# Supplementary material for: Motivating factors on performance of primary care workers in China: a systematic review and meta-analysis
Source: PubMed Central journal article supplement — BMJ Open. 2019 Nov 21;9(11):e028619. doi: 10.1136/bmjopen-2018-028619 (PMC6886956; doi:10.1136/bmjopen-2018-028619), 2019-11-21
Supplement: bmjopen-2018-028619.draft_revisions.pdf [file bmjopen-2018-028619.draft_revisions.pdf]

# BMJ Open

BMJ Open is committed to open peer review. As part of this commitment we make the peer review history of every article we publish publicly available.

When an article is published we post the peer reviewers' comments and the authors' responses online. We also post the versions of the paper that were used during peer review. These are the versions that the peer review comments apply to.

The versions of the paper that follow are the versions that were submitted during the peer review process. They are not the versions of record or the final published versions. They should not be cited or distributed as the published version of this manuscript.

BMJ Open is an open access journal and the full, final, typeset and author-corrected version of record of the manuscript is available on our site with no access controls, subscription charges or pay-per-view fees (<http://bmjopen.bmj.com>).

If you have any questions on BMJ Open's open peer review process please email [info.bmjopen@bmj.com](mailto:info.bmjopen@bmj.com)

# BMJ Open

## Motivating factors on performance of primary care workers in China: A systematic review and meta-analysis

|                               |                                                                                                                                                                                                                                                                                                                          |
|-------------------------------|--------------------------------------------------------------------------------------------------------------------------------------------------------------------------------------------------------------------------------------------------------------------------------------------------------------------------|
| Journal:                      | <i>BMJ Open</i>                                                                                                                                                                                                                                                                                                          |
| Manuscript ID                 | bmjopen-2018-028619                                                                                                                                                                                                                                                                                                      |
| Article Type:                 | Research                                                                                                                                                                                                                                                                                                                 |
| Date Submitted by the Author: | 17-Dec-2018                                                                                                                                                                                                                                                                                                              |
| Complete List of Authors:     | Li, Huiwen; China Centre for Health Development Studies, Peking University<br>Yuan, Beibei; China Centre for Health Development Studies, Peking University<br>Wang, Dan; China Centre for Health Development Studies, Peking University<br>Meng, Qingyue; China Centre for Health Development Studies, Peking University |
| Keywords:                     | Primary health care, Primary care workers, Performance, Motivation, Health policy < HEALTH SERVICES ADMINISTRATION & MANAGEMENT                                                                                                                                                                                          |
|                               |                                                                                                                                                                                                                                                                                                                          |

SCHOLARONE™  
Manuscripts

1  
2  
3  
4 1 **Motivating factors on performance of primary care workers in**  
5  
6  
7 2 **China: A systematic review and meta-analysis**  
8  
9

10 3  
11  
12  
13 4 Huiwen Li, Beibei Yuan\*, Dan Wang and Qingyue Meng  
14  
15

16 5  
17  
18  
19  
20 6 China Centre for Health Development Studies, Peking University, Beijing, China  
21  
22

23 7 (H Li PhD, Prof B Yuan PhD, D Wang MD, Prof Q Meng PhD)  
24  
25

26 8 Email: hli@bjmu.edu.cn, beibeiyuan@pku.edu.cn, wangdanevelyn@163.com,  
27  
28

29 9 qmeng@pku.edu.cn  
30  
31

32 10  
33  
34

35 11 Correspondence: Prof Beibei Yuan, China Centre for Health Development Studies, Peking  
36  
37

38 12 University, Beijing 100191, China  
39  
40

41 13 Email: beibeiyuan@pku.edu.cn  
42  
43

44 14  
45  
46

47 15 **Number of tables and figures:** 2 table, 3 figures are included in this article.  
48  
49

50 16  
51  
52

53 17  
54  
55

56 18  
57  
58  
59  
60

## 19 Abstract

20 **Objective:** Although China has made remarkable progress in strengthening its primary health  
21 care system, lack of well-performed primary health workforce is still the bottleneck of  
22 deepening the reform. The objective of this review is to understand the current profile of  
23 Chinese primary care workers (PCWs) and their motivating factors of performance and  
24 propose targeted policy suggestions on improving their work performance.

25 **Design:** Systematic review

26 **Methods:** A systematic search of PubMed and MEDLINE was conducted to identify articles  
27 published from Jan 1, 2000 to Jun 2, 2018. Quality assessment and data extraction for the  
28 studies closely relevant to performance of PCWs in China were conducted by two reviewers  
29 independently. A preliminary framework containing different levels of factors influencing  
30 PCWs' motivation based on ERG theory guided the synthesis analysis. In addition, we used a  
31 random-effects model to pool individual studies on job satisfaction and estimate the overall  
32 job satisfaction of PCWs.

33 **Results:** A total of 36 articles were included; 16 (23 882 participants) in the meta-analysis.  
34 Regarding the individual level of motivation, 3 overarching themes and 12 sub-themes were  
35 developed. The sub-themes of financial incentives, career advancement and work itself were  
36 frequently mentioned and have more influences on PCWs' performance. Moreover, the  
37 healthcare system reform policies have inevitable and complex impacts on different levels of  
38 human needs, and then influences on the motivation and performance of PCWs.  
39 Meta-analysis showed that the overall job satisfaction score among PCWs was 3.30, just

1  
2  
3  
4 40 reaching a satisfied rating and varied in different regions.  
5  
6

7 41 **Conclusions:** This study suggests low work satisfaction among PCWs in China, with  
8  
9  
10 42 financial incentives and career advancement being two most important motivating factors.  
11  
12 43 Efforts to improve the work performance in PCWs should give priority to these motivating  
13  
14 44 factors and systematically take into account the health policy's impacts on performance of  
15  
16  
17 45 PCWs.  
18  
19

## 20 21 46 **Keywords**

22  
23  
24 47 Primary health care, Primary care workers, Performance, Motivation, Health policy  
25  
26

## 27 48 **Strengths and limitations of this study**

28  
29  
30 49 ► This is the first comprehensive systematic review that identifies the motivating factors on  
31  
32  
33 50 performance of Chinses primary care workers including both individual level factors and  
34  
35  
36 51 health system level factors.  
37

38  
39 52 ► Reliability of the study selection, data extraction and rating of the study quality was  
40  
41  
42 53 ensured using two independent reviewers.  
43

44  
45 54 ► Studies providing job satisfaction data of primary care workers were systematically  
46  
47  
48 55 performed by a separate meta-analysis. In addition, three main primary health sector reform  
49  
50  
51 56 policies were comprehensively analyzed.  
52

53 57 ► Chinese articles were not included in this review.  
54  
55

## 56 58 **Introduction**

57  
58  
59 59 Primary health care (PHC) services in China including public health service and basic  
60

1  
2  
3  
4 60 medical health service, are provided by urban community health centres (CHCs) and affiliated  
5  
6 61 community health stations (CHSs), rural township health centres (THCs) and affiliated village  
7  
8  
9 62 clinics (VCs). These four types of primary health institutions (PHIs) act as the essential part  
10  
11 63 of three-tertiary health care delivery network in China. Strengthening primary health care has  
12  
13  
14 64 been a central aim in China's health system reform initiated in 2009<sup>1</sup>. However, the structure  
15  
16  
17 65 of health care delivery system in China still faced lots of challenges since the 2009 health  
18  
19  
20 66 system reform, and the low-performance of PHC delivery system is the bottleneck to  
21  
22 67 deepening the reform<sup>2</sup>. Although the number of PCWs increased from 3.3 million in 2010 to  
23  
24  
25 68 3.7 million in 2016, the proportion of them in all health workers decreased from 40.0% to  
26  
27  
28 69 33.0%. The utilization of health services provided by PHIs had the same pattern that the  
29  
30  
31 70 proportion of PHIs' outpatient visits decreased from 61.9% (3.6 billion visits) to 55.1% (4.4  
32  
33 71 billion visits) and the proportion of PHIs' inpatient visits decreased from 27.9% (39.5 million  
34  
35 72 hospitalizations) to 18.3% (41.7 million hospitalizations) between 2010 and 2016<sup>3</sup>. Under  
36  
37  
38 73 these circumstances, the strengthening of primary health system will still be the emphasis of  
39  
40  
41 74 health system reform in near future: the Outline of Healthy China 2030 Plan, a government  
42  
43  
44 75 blueprint for health system development, specially highlighted the important role of primary  
45  
46 76 health care<sup>4</sup>.

47  
48 77 Health workforce shortage is one of the major obstacles in the process of strengthening  
49  
50  
51 78 primary health care services in China<sup>5</sup>. The primary health workforce is facing serious  
52  
53  
54 79 challenges including low education level, lack of qualifications, aging, high turnover and poor  
55  
56  
57 80 working performance<sup>6</sup>. In all determinants of performance of PCWs, improving work  
58  
59 81 motivation is a crucial channel to change the behavior of health providers, as motivation in  
60

1  
2  
3  
4 82 the work context can be defined as an individual's degree of willingness to exert and maintain  
5  
6  
7 83 an effort towards organizational goals<sup>7</sup>. It has been demonstrated that work motivation can  
8  
9  
10 84 influence job satisfaction, and then influence job performance<sup>8 9</sup>. In this review, we aim to  
11  
12 85 synthesize and analyze the motivating factors of PCWs and provide evidence-based policy  
13  
14  
15 86 implication on how to improve the performance of PCWs in China.  
16  
17

## 18 87 **Methods**

### 22 88 **Search strategy and eligibility criteria**

25 89 We searched the PubMed and MEDLINE on June 2, 2018 to identify relevant studies  
26  
27  
28 90 using MeSH and free-text words, including all their possible synonyms and spellings terms<sup>6</sup>,  
29  
30  
31 91 in conjunction to increase sensitivity to potentially appropriate literature published. Full  
32  
33  
34 92 search terms are provided in the Supplementary Appendix 1. Search results were exported to  
35  
36  
37 93 EndNote X7 to be organized and duplicates records were removed firstly. Two authors  
38  
39  
40 94 exported the citations to Microsoft Excel and independently conducted the literature screening  
41  
42  
43 95 and selection. Divergent judgments were solved by discussion. We searched for and included  
44  
45  
46 96 articles about the motivating factors on performance of PCWs who work in four kinds of  
47  
48  
49 97 PHIs, including rural THCs, VCs and urban CHCs and CHSs in China. This study defined  
50  
51  
52 98 motivation in the work context as an individual's degree of willingness to exert and maintain  
53  
54  
55 99 an effort towards organizational or system goals<sup>10</sup>, and we also regarded the degree of job  
56  
57  
58 100 satisfaction, work stress and turnover intention as the possible reflections of motivation which  
59  
60 101 may influence work performance. We also searched for relevant studies identified from  
102 references of included articles and other sources. The study designs we included are any

1  
2  
3  
4 103 observational or experimental studies with primary quantitative or qualitative data. Only  
5  
6 104 English language articles published between 2000 and 2018 were included. Records were  
7  
8  
9 105 excluded if the study did not address the motivating factors of PCWs, and of the participants  
10  
11  
12 106 of study were not PCWs or not belong to the four kinds of PHIs mentioned above.

### 107 **Data extraction and synthesis**

108       Extracted items included study design, year or years of study, settings, participants,  
109 sample sizes, measurement of motivation, objective, key motivation conclusions and  
110 motivating factors. Data extraction and analysis were guided by Alderfer's ERG Theory,  
111 which elicits three core human needs in organizational settings: Existence (the desire for  
112 material things), Relatedness (the desire for cordial interpersonal relations), and Growth (the  
113 desire for opportunities to be creative and to develop one's skills)<sup>11</sup>. A thematic synthesis  
114 approach was used for data analysis to capture the ranges of evidence illustrating PCWs'  
115 motivation. Motivating factors extracted from included articles were grouped into four themes  
116 based on the ERG framework: 1) existence needs factors include payment, fringe benefits and  
117 physical working conditions; 2) relatedness needs factors refer to the social environment and  
118 relationship; 3) growth needs factors refer to career or self-development and management  
119 environment; 4) health policy context factors and organizational context which could  
120 influence one or more needs categories mentioned above. The first three themes of motivating  
121 factors represent three different dimensions of human needs in PHIs at individual level and  
122 the last theme was listed separately because the different health policies have complex  
123 impacts on performance through influencing more than one dimension of human needs at



1  
2  
3  
4 124 macro level. Firstly, authors began to aggregate data into motivating factors, extracted all  
5  
6 125 original motivating factors in each articles and classified them to one of the four relevance  
7  
8  
9 126 themes. Then we identified correlations between the different factors, refined them through  
10  
11  
12 127 discussion and synthesized the familiar factors into a higher level theme.

13  
14  
15 128 We used meta-analysis to synthesize the 16 articles providing job satisfaction data of  
16  
17 129 PCWs. We pooled the study-specific estimates using a random effects meta-analysis model to  
18  
19  
20 130 obtain an overall summary job satisfaction scores across studies in China<sup>12</sup>. We analyzed data  
21  
22  
23 131 using Stata version 14.0 for Windows.

## 132 **Role of the funding source**

24  
25  
26  
27  
28  
29  
30 133 The funders of the study had no role in study design; collection, analysis, and interpretation  
31  
32 134 of data; writing the report; or the decision to submit the paper for publication.

## 135 **Results**

### 136 **Characteristics of reviewed studies**

33  
34  
35  
36  
37  
38  
39  
40  
41  
42  
43 137 We firstly screened 5466 titles and abstracts, and then 348 full-texts of potential  
44  
45  
46 138 relevant studies were retrieved and screened to evaluate their eligibility (Figure 1). After full  
47  
48  
49 139 text screening, 119 studies relevant to the human resources of primary health care in China  
50  
51  
52 140 were included for us to understand the current status of PCWs. To obtain sufficient  
53  
54 141 information related to motivation of PCWs, 1 additional article from reference search was  
55  
56  
57 142 also identified and included after applying the eligibility criteria. Finally, from 119 studies, 83  
58  
59 143 studies which did not contain specific motivating factors were excluded and 36 studies closely  
60

1  
2  
3  
4 144 related to motivation of PCWs were selected for data extraction and synthesis. A list of  
5  
6  
7 145 included articles' basic characteristics can be found in Supplementary Appendix 2. This  
8  
9 146 review covered at least 27 provinces of China. 25 quantitative, 7 qualitative, and 4 mixed  
10  
11 147 methods primary studies were included. All of 36 articles are cross-sectional study. 17 studies  
12  
13  
14 148 took place in rural areas of China, 11 took place in urban areas, and 8 in both urban and rural  
15  
16  
17 149 areas. Among the 17 studies about rural areas, 8 articles only included village doctors in  
18  
19 150 village clinics as participants, 5 articles only studied health workers in THCs and 4 articles  
20  
21  
22 151 are about rural PCWs in both village clinics and THCs. The 11 studies in urban areas are  
23  
24 152 about urban PCWs in community health centers/stations. 4 articles studied all types of PCWs  
25  
26  
27 153 in different kinds of rural and urban PHIs. Included studies analyzed the motivation of PCWs  
28  
29 154 from different perspectives: some directly using job satisfaction as measurement tool<sup>13-28</sup>,  
30  
31 155 some explored the motivation factors' influence on attrition and retention<sup>16 20 29-33</sup>, some  
32  
33 156 studied the impact of some policies or interventions on motivation factors of health workers<sup>29</sup>  
34  
35 157 <sup>34-38 39-44</sup>.

## 158 **Motivating factors for PCWs**

### 159 **Existence need factors**

160 Financial incentives, workload and work conditions related to a person's physical needs  
161 such as food, clothing, and shelter are clustered as existence need factors. In this review, we  
162 found that work conditions, payment and the workload that had to be done were considered as  
163 significant factors relating to dissatisfaction<sup>13 17 18 20 21 23 28 45</sup> and turnover intention<sup>16 20</sup> of  
164 PCWs. 26 out of 36 articles reported financial incentives (Table 1). Financial incentives

1  
2  
3  
4 165 including the income and fringe benefits were significantly associated with job satisfaction<sup>13</sup>  
5  
6 166<sup>15 28</sup> and difficulties in recruitment of PCWs<sup>30 32 33</sup>. Moreover, both financial incentives and  
7  
8  
9 167 working conditions were the most important motivating factors for PCWs to improve  
10  
11  
12 168 performance<sup>19 31</sup>.

13  
14  
15 169 Another part of literatures explored different health system reform policies on this kind  
16  
17 170 of motivation factors. For example, in a qualitative study, administrators and frontline  
18  
19  
20 171 healthcare workers in PHIs mentioned that the increased income after the 2009 health system  
21  
22  
23 172 reforms did not fully reflect the increased workload, and those who worked mostly hardly did  
24  
25  
26 173 not necessarily get paid the most, which led to some health workers becoming demotivated<sup>35</sup>.

#### 174 **Relatedness need factors**

175 Relatedness need factors which related to a person's interpersonal needs within his  
176 personal as well as professional settings, were regarded as the relationship with four  
177 dimensions: the living environment, the society, the coworkers and the nature of work in this  
178 review.

179 Work itself and working relationships were reported by 17 and 11 studies respectively  
180 (Table 1). The PCWs were more satisfied with nature of work and work relationships as  
181 compared with satisfaction level with existence need factors<sup>18 23 28</sup>. It suggests that most  
182 workers get along well with their colleagues and consider their jobs to be of importance,  
183 which provide a good motivating source in the circumstances of poor physical environment.

184 13 of selected studies reported recognition from society including understanding by  
185 society, physical-patient relationships (Table 1). Satisfaction with social status, relationship

1  
2  
3  
4 186 with patients were significantly associated with job satisfaction<sup>13,28</sup>. There are some  
5  
6 187 significant rural–urban differences, with rural PCWs were slightly more satisfied with  
7  
8  
9 188 patients' respect than their urban counterparts <sup>21</sup>. However, few rural PCWs expressed  
10  
11 189 satisfaction with their current relationships and indicated that the patients could not  
12  
13  
14 190 understand the doctor's work<sup>45</sup>. In addition, the increasing workplace violence had negative  
15  
16  
17 191 effects on the job performance and quality of life of PCWs <sup>46</sup> and become a major contributor  
18  
19  
20 192 to doctors' low morale in recent years <sup>14</sup>.

21  
22  
23 193 6 studies reported the living environment as a relatedness need motivator (Table 1).  
24  
25 194 Studies revealed that there were greater needs for improvement in rural areas than needs in  
26  
27  
28 195 urban settings, especially in living environment <sup>19,31</sup>. The young health workers' sense of  
29  
30  
31 196 belonging and responsibility to their hometown is gradually disappearing, which results in  
32  
33  
34 197 more difficulties in recruiting young health workers born in local areas<sup>30</sup>.

### 198 **Growth need factors**

35  
36  
37  
38  
39 199 Career advancement, training, rewards, management and autonomy relating to a  
40  
41  
42 200 person's needs of personal development were considered as growth need factors in this  
43  
44  
45 201 review.

46  
47  
48 202 19 out of 36 articles reported the factor of career advancement (Table 1), which was  
49  
50  
51 203 considered as the one of top three items leading to dissatisfaction <sup>13,14,17,18,20,21,27</sup>. The gap  
52  
53  
54 204 between desired and actual professional development was one of the main sources of job  
55  
56  
57 205 satisfaction <sup>15</sup>. Limited opportunities for job promotion was also a way to describe how this  
58  
59  
60 206 factor contributing to lower work passion <sup>17</sup> and the turnover intention of village doctors <sup>16,20</sup>.

1  
2  
3  
4 207 The main causes might be few positions and opportunities for the health professionals in PHIs  
5  
6 208 to get higher professional titles on the regular payroll, especially compared with the  
7  
8  
9 209 opportunities in higher level health institutions even with the same education background and  
10  
11 210 technical carder.

12  
13  
14  
15 211 Training was mentioned as a motivating factor by 13 out of 36 articles (Table 1).  
16  
17 212 Learning and training were significantly associated with work passion<sup>17</sup>, job satisfaction<sup>13</sup>  
18  
19 213 <sup>27</sup>and turnover intention<sup>20</sup>. Along with career advancement, training was also considered as  
20  
21 214 one of the most important motivating factors for PCWs to improve performance <sup>19</sup>. However,  
22  
23 215 the training arrangements and needs of China's PCWs were segmented and inadequate <sup>32 47 48</sup>.  
24  
25 216 Health workers wanted to extend the training time, converted the training method from  
26  
27 217 knowledge-focus to practice-focused training (on-site guidance from senior doctors, clinical  
28  
29 218 further education), and had more needs for training content of clinical skills, preventive  
30  
31 219 healthcare and medication knowledge education <sup>47</sup>. Consequently, although training was  
32  
33 220 reported to be an effective form of incentive for recruitment, it has not acted as an effective  
34  
35 221 motivator to attract young doctors to rural areas in China <sup>32</sup>.

36  
37  
38  
39  
40  
41  
42  
43  
44 222 There are 9, 9 and 14 selected studies reported the motivation factors of rewards,  
45  
46 223 management and autonomy, respectively (Table 1). Most articles reported that PCWs were  
47  
48 224 relatively satisfied with the decision-making ability of their superiors, contingent reward and  
49  
50 225 opportunities to do work by making own decisions and utilize professional skills and talents <sup>13</sup>  
51  
52 226 <sup>20</sup>.

53  
54  
55  
56  
57  
58 227 **System and policy factors**  
59  
60

1  
2  
3  
4 228 Motivation is not only influenced by individual level motivators but also by the whole  
5  
6 229 range of health sector reforms and specific incentive schemes targeting workers <sup>7</sup>.

7  
8  
9 230 Theoretically, any health sector reforms would directly influence the motivation factors the  
10  
11 231 health workers will feel or have influences on how the health organizations designed their  
12  
13 232 institutions, which in turn would have an impact on what health workers will get from their  
14  
15 233 works. 18 out of 36 articles reported the macro-level factors (Table 1), health system and  
16  
17 234 policy factors, like National Essential Medicines System (NEMS), National Basic Public  
18  
19 235 Health Service Program (NBPHSP) and Township and Village Health Services Integration  
20  
21 236 Management (TVHSIM). The gap between desired and actual policies' implementation  
22  
23 237 consequences was one of the main determinants of job satisfaction <sup>15</sup>. The comprehensive  
24  
25 238 reform of PHC in Anhui has changed their compensation patterns and improved the income  
26  
27 239 and work efficiency of PCWs, but decreased their work enthusiasm because of  
28  
29 240 inappropriately designed performance-based evaluation system<sup>35</sup>. Different economic status  
30  
31 241 and health reform processes may lead to different consequences. PCWs under the  
32  
33 242 comprehensive reform of PHC in Shandong perceived their job as more trivial, heavy  
34  
35 243 workload, blurred job description, unsatisfactory income, and a lack of professional  
36  
37 244 development, but satisfied with the relationship with community and low work pressure<sup>39</sup>.

38  
39  
40  
41  
42  
43  
44  
45  
46  
47  
48 245 The NEMS uses a new National Essential Drugs List to ensure free access to safe,  
49  
50 246 effective medication for the patients, and also includes a series polices on drug production,  
51  
52 247 pricing and distribution to encourage rational prescribing by changing their reliance on drug  
53  
54 248 sales and profit seeking behaviors. The impacts of the NEMP vary by region, professional  
55  
56 249 practice and the income level<sup>40</sup>. In a survey most PCWs perceived no change in their income  
57  
58  
59  
60

1  
2  
3  
4 250 and had a high level of satisfaction towards NEMS<sup>43</sup>. However, according to another in-depth  
5  
6 251 interviews with village doctors<sup>34</sup>, the introduction of an essential drug list for PHIs, in which  
7  
8  
9 252 only drugs on the list were allowed to be prescribed in VCs and providers were forbidden to  
10  
11 253 add a profit (zero mark-up) in drug prices, dramatically decreased their medical income in  
12  
13  
14 254 most areas with limited amounts of drug subsidies from the government to supplement their  
15  
16  
17 255 incomes. At the same time, they also complained that they had lost patients' trust and work  
18  
19 256 enthusiasm as the species and total amount of essential medicines were not enough for daily  
20  
21  
22 257 treatment needs. <sup>40 43</sup>

25 258 The NBPHSP starting from 2009 provides a package of basic public health services for  
26  
27  
28 259 all residents, with a focus on the management of non-communicable disease. To motivate  
29  
30  
31 260 PCWs to provide preventive health services, the government pays the subsidies based on the  
32  
33  
34 261 number of covered residents. At the beginning of this reform, due to the broad scope of basic  
35  
36 262 public health services and limited financial incentives, providers felt that they were under  
37  
38  
39 263 great stress because of many competing demands for their time and complained about the  
40  
41 264 heavy workload, insufficient remuneration, staff shortage, lack of formal professional identity  
42  
43  
44 265 and ineffective performance appraisal, in addition to distrust and disrespect from some  
45  
46 266 residents <sup>38 44</sup>, especially those only working for public health works being regarded as having  
47  
48  
49 267 lower levels of knowledge and skill than specialists<sup>37</sup>. Providers who received more subsidies,  
50  
51 268 training opportunities and integrated management had better performance in service provision  
52  
53  
54 269 <sup>42</sup>.

57 270 The TVHSIM regarding a vertical integrated management which requires upper-level  
58  
59 271 health institutions, THCs, to direct and supervise VCs in their works on medicine, personnel

1  
2  
3  
4 272 management, financing, facilities upgrading and maintaining and other routine works, had  
5  
6 273 complex influences on village doctors. Under the integrated management, most village  
7  
8  
9 274 doctors felt more respected because they were more recognized as health workers in formal  
10  
11 275 health system under integrated management instead of private drug salesmen. Nevertheless  
12  
13  
14 276 they were not allowed to perform agricultural or other side activities for other income<sup>24,34</sup>,  
15  
16  
17 277 which had a negative impact on the financial resources.

### 21 278 **Job satisfaction for PCWs**

22  
23  
24 279 The performance of healthcare delivery system is critically dependent on worker  
25  
26 280 motivation directly mediated by workers' willingness<sup>7</sup>. And satisfaction is one of the  
27  
28  
29 281 important indicators to measure the workers' willingness to exert efforts and has important  
30  
31 282 implications for sustainable development of primary healthcare in China. 17 included articles  
32  
33 283 assessed the job satisfaction as one of the important dimensions reflecting providers'  
34  
35 284 motivation (Supplementary Appendix 3). As 2 articles<sup>22,37</sup> provided data of 2 provinces/cities  
36  
37 285 and 1 article<sup>18</sup> represented data of two years, there is totally 20 investigation samples  
38  
39 286 extracted from these 17 cross-sectional study design articles, representing more than half of  
40  
41 287 the provinces in China. The overall job satisfaction score ranged from 1.82 to 4.49. The  
42  
43 288 satisfaction level varied from region to region (Figure 2). The satisfaction scores of most  
44  
45 289 samples from more than three provinces were stable between 3.37 and 3.55. The scores of  
46  
47 290 samples from the middle areas were lower than the eastern areas and the score of Xinjiang  
48  
49 291 representing the western areas was the highest among the included samples.

50  
51 292 Meta-analysis methods of combining results weighted by sample size showed that the  
52  
53  
54  
55  
56  
57  
58  
59  
60



1  
2  
3  
4 293 overall job satisfaction score among PCWs was 3.30, equivalent 0.66 ([95% CI 0.61–0.71];  
5  
6 294  $I^2=98.7\%$ ;  $P<0.001$ ; Figure 3), just reaching a satisfied rating. But the overall satisfaction  
7  
8  
9 295 mean of rural health workers was lower than the urban workers (Table 2).  
10  
11  
12

## 13 296 **Discussion**

14  
15  
16  
17 297 **Financial incentives and career advancement were the most important**  
18  
19 298 **motivating factors for PCWs in China.** The balance between remuneration and  
20  
21  
22 299 workload, and career promotion opportunities were most frequently mentioned in the  
23  
24 300 included articles as critical motivating factors on performance of PCWs. Though in recent  
25  
26  
27 301 years, China government has input a lot to improve the income security of health workers in  
28  
29 302 PHIs, with increasing urbanization and life costs, the gaps between actual and expected  
30  
31 303 income have been increasing. Performance-related salary was mentioned by some doctors in  
32  
33 304 THCs as a policy which was supposed to account for 30-40% of the salary based on their  
34  
35 305 workload, quality of service and patients' satisfaction, but with limitation of overall revenue  
36  
37 306 level and its structure, in order to only reward well-performed health worked by reducing the  
38  
39 307 income levels of those poorly performed. Actually this payment method was rarely operated  
40  
41 308 well in practice for motivating health workers at this moment <sup>[33]</sup>. How to improve the income  
42  
43 309 level of health workers in primary health delivery system is a crucial but very hard policy  
44  
45 310 problem in the near future.  
46  
47  
48  
49  
50  
51  
52  
53

54 311 Besides, according to our analysis from Figure 2, financial incentives are no longer the sole  
55  
56 312 means for stimulating motivation, improving job satisfaction and work performance. Other  
57  
58 313 factors, particularly professional development, work characteristics and training has been  
59  
60

1  
2  
3  
4 314 equally, if not more, important for PCWs in China. In particular, the lack of chances for  
5  
6 315 professional title promotion and limited career development space are important reasons that  
7  
8  
9 316 lead to turnover intention. This is in line with other studies published internationally and  
10  
11 317 highlights the importance of packaging financial and non-financial incentives<sup>7 49</sup>. The ERG  
12  
13  
14 318 framework implies that the fulfillment of human needs has an important role in PCWs'  
15  
16  
17 319 motivation and the order of importance of the existence need, relatedness needs and growth  
18  
19  
20 320 needs may vary from each individual. In this review, we find that Chinese PCWs are at the  
21  
22 321 stage where barriers exist in fulfillment of all three levels human needs. Income security has  
23  
24  
25 322 increased, but far lower than the expected level; the recognition and cooperation of residents  
26  
27  
28 323 on the public health works of PCWs have played negative role in influencing the motivation  
29  
30  
31 324 and behaviors of health workers; career promotion system and training arrangements did not  
32  
33  
34 325 meet their growth need neither. Policy makers must recognize that a health worker has  
35  
36  
37 326 multiple needs to satisfy simultaneously and priority measures in improving the motivation  
38  
39  
40 327 should be selected based on local institutional environments and personal preference.  
41  
42  
43 328 Focusing exclusively on one kind of need at a time will not effectively work for motivating  
44  
45  
46 329 PCWs.

47 330 **The overall job satisfaction score among PCWs was still low, especially in rural**  
48  
49 331 **areas.** The overall job satisfaction score was considered as the predictors of job satisfaction,  
50  
51  
52 332 reflecting the PCWs' emotional situation and status of human needs satisfaction. There is  
53  
54  
55 333 considerable room for improvement in Chinese PCWs' performance by identifying  
56  
57  
58 334 motivating factors and increasing their work satisfaction. The most prominent factor causing  
59  
60 335 general dissatisfaction of PCWs, especially of those from rural areas is the financial rewards

1  
2  
3  
4 336 from work The annual income of 84.06% village doctors was less than 30 000 renminbi  
5  
6 337 (RMB), which is still much lower than the average income for a doctor in higher level health  
7  
8  
9 338 institutions of Jiangxi Province in 2014 (56 394 RMB) and nearly half the village doctors  
10  
11 339 thought their income level was lower compared with other people in the local area<sup>13</sup>. In  
12  
13  
14 340 addition, the health system reform policies also have indirect and negative consequences on  
15  
16  
17 341 PCWs' income level and are further damaging their job satisfaction, which is discussed in the  
18  
19  
20 342 following paragraphs. These findings have significant implications for policy makers and  
21  
22 343 managers of PHIs regarding their efforts to improve workers' job satisfaction <sup>15 26</sup>. Another  
23  
24  
25 344 finding of the synthesis was the significant differences of satisfaction scores among eastern,  
26  
27  
28 345 western and middle areas of China. It is no doubt that there is imbalance existing among all  
29  
30  
31 346 levels of areas in China. Provinces in the eastern areas were more developed in economy and  
32  
33  
34 347 health facilities there are better equipped than other areas, so the job satisfaction of PCWs  
35  
36  
37 348 was higher than it in the middle areas China under better environments. However, the job  
38  
39  
40 349 satisfaction score in western China was better than it in the eastern areas. Considering western  
41  
42  
43 350 areas of China are remote areas with less economic development status the higher job  
44  
45  
46 351 satisfaction of PCWs may due to the lower expectations of PCWs in western areas and more  
47  
48  
49 352 financial transfer subsidies and other supports from central government directing to remote  
50  
51  
52 353 western areas. The government should also considered the imbalance the development in  
53  
54  
55 354 different areas specially the middle areas China where the economic development and  
56  
57  
58 355 resources inputs are limited, and the central government's transfer subsidy are also neglected.  
59  
60  
61 356 **The health system reform and some specific policies have inevitable and indirect**  
62  
63  
64 357 **impacts on PCWs.** In 2009, China launched a landmark healthcare reform with the goal of

1  
2  
3  
4 358 providing affordable and equitable basic health care for all by 2020<sup>5</sup>. Strengthening the  
5  
6  
7 359 primary health system is one of the key reform aspects in the health system reform, so several  
8  
9  
10 360 policies directly targeted to PHIs or PCWs. The satisfaction of pay and contingent rewards  
11  
12 361 has slightly improved, which may be attributed to the guarantee of the PCWs' basic wages by  
13  
14 362 government finance<sup>18</sup>. However, with China making remarkable progress in strengthening  
15  
16  
17 363 the primary health system, some new problems or unintended consequences of related  
18  
19  
20 364 reforms appeared, for example, a brain drain of experienced health workers from THCs, and  
21  
22 365 patients have flowed to county hospitals at greater cost<sup>6 29</sup>. In the process of health system  
23  
24  
25 366 reforms, three policies and their impacts on motivation of health workers were frequently  
26  
27  
28 367 studied in literatures:

30  
31 368 The NEMS has had lasting impacts on PCWs' income structure since the policies'  
32  
33 369 implementation in 2009<sup>34</sup>. The essential drug list removed the incentives for overprescribing,  
34  
35  
36 370 but led to falls in income and loss of autonomy<sup>29</sup> because the government subsidies for public  
37  
38  
39 371 health works were not enough to offset the decline in revenue from drug prescriptions at  
40  
41  
42 372 PHIs. With problems in drug supply procurement, unintended consequences on motivation  
43  
44  
45 373 and related behavior of health workers emerged: a brain drain of experienced health workers  
46  
47  
48 374 from THCs have flowed to county hospitals because the limited supply of many medicines  
49  
50  
51 375 have restricted their prescription behavior and resulted in the loss of many patients. In  
52  
53  
54 376 conclusion, policy makers should consider how to reduce the adverse effects of essential drug  
55  
56  
57 377 policy on motivation of PCWs, including how to appropriately remunerate health workers and  
58  
59  
60 378 ensure the enough clinical autonomy, and to ensure a timely supplied, transparent and  
379 accountable the drug supply procurement.

1  
2  
3  
4 380 At the beginning of the NBPHSP, PCWs - who were responsible for basic public health  
5  
6 381 services held negative attitudes toward the sustainable provision of these basic public health  
7  
8  
9 382 services, because this policy increased their workload and the subsidy being insufficient  
10  
11 383 remuneration for their efforts<sup>36 38 44 50</sup>. To motivate PCWs to provide these health services, the  
12  
13  
14 384 government subsidies have increased from 15 RMB per person for 2009 to 50 RMB for 2017.  
15  
16  
17 385 However, the heavy workload, rigid performance assessment procedure and lack of  
18  
19 386 professional knowledge still exist, resulting in a negative effect on PCWs' job satisfaction and  
20  
21  
22 387 performance. We would suggest shifting the evaluation of PCWs' performance from faults  
23  
24 388 seeking to supportive directions, improving ability of public health providers or strengthening  
25  
26  
27 389 the team work between clinical doctors with public health workers in order to strengthen the  
28  
29  
30 390 overall capacity on delivery of these public health services.  
31  
32

33 391 After the implementing of TVHSIM, village doctors were managed just as the same  
34  
35 392 role as staff of THCs and no longer the self-employed status that was not integrated in to  
36  
37  
38 393 formal health delivery system. Their income structure had gradually transformed as  
39  
40  
41 394 government subsidy has become an increasing source of income. They were motivated not  
42  
43  
44 395 only by the more stable financial subsidy from government, but also enjoyed good reputation  
45  
46 396 and respect from local residents as a health provider with formal status. However, the income  
47  
48  
49 397 level and fringe benefit village doctors obtained are still lower than the regular employee in  
50  
51 398 THCs, which still be an demotivating factor for village doctors<sup>32</sup>. A well-rounded social  
52  
53  
54 399 insurance model for village doctors is urgently needed further promotion<sup>41</sup>.  
55  
56

57 400 The findings of this review adds value to the current literature, as it included  
58  
59 401 qualitative, quantitative and mix methods studies to present an overview on the motivation of  
60

1  
2  
3  
4 402 primary health workers in China, but it should be interpreted with caution because of several  
5  
6 403 limitations. First, this review only focuses on the motivating factors of PCWs' work  
7  
8  
9 404 performance, and other relevant articles on motivation factors for attracting or retaining  
10  
11 405 PCWs had been excluded by the search strategy. Secondly, all included studies analyzed  
12  
13  
14 406 PCWs' motivation from the perspective of negative problems and critics, which could lead to  
15  
16  
17 407 some bias because of few positive thoughts on current motivation status of PCWs being  
18  
19 408 found.  
20  
21  
22  
23  
24  
25

## 26 410 **Conclusions**

27  
28  
29 411 Low motivation of PCWs is a bottleneck for promoting work performance of  
30  
31 412 on-service PCWs in China. Policy makers should take account of all level of human needs  
32  
33 413 influencing motivation of PCWs based on local reality, and consider firstly ensuring PCWs'  
34  
35 414 appropriate remuneration level and career development space as priorities. We also suggest  
36  
37 415 that countries undergoing health system level reform should consider the views of different  
38  
39 416 stakeholders and analyze the potential side effects on health providers of some specific  
40  
41 417 policies who are not directly targeted, in order to achieve benefits for both providers and  
42  
43 418 demanders<sup>13</sup>  
44  
45  
46  
47  
48  
49  
50  
51  
52  
53

## 54 420 **Abbreviations**

55  
56  
57 421 PCW: Primary care worker; PHC: Primary health care; CHC: Community health  
58  
59 422 centre; CHS: Community health station; THC: Township health centre; VC: Village clinic;  
60

1  
2  
3  
4 423 PHI: Primary health institution; NEMS: National Essential Medicines System; NBPHSP:  
5  
6  
7 424 National Basic Public Health Service Program; TVHSIM: Township and Village Health  
8  
9 425 Services Integration Management; RMB: renminbi  
10  
11

## 12 426 **Acknowledgements**

13  
14  
15 427 We are grateful to Xi Li from National Clinical Research Center of Cardiovascular  
16  
17  
18 428 Diseases, State Key Laboratory of Cardiovascular Disease, Fuwai Hospital, National Center  
19  
20  
21 429 for Cardiovascular Diseases, Chinese Academy of Medical Sciences and Peking Union  
22  
23  
24 430 Medical College, Beijing, People's Republic of China, for support and technical advice on the  
25  
26 431 inclusion criteria.  
27  
28

## 29 432 **Contributors**

30  
31  
32 433 All authors proposed the hypothesis and idea for the systematic review and take  
33  
34  
35 434 responsibility for all aspects of it. QM, BY and HL discussed and contributed to  
36  
37  
38 435 conceptualization of this review and development of review protocol. BY applied the  
39  
40  
41 436 inclusion criteria. HL and DW applied data extraction. HL was a major contributor in writing  
42  
43  
44 437 the manuscript. All authors read and approved the final manuscript.  
45  
46

## 47 438 **Funding**

48  
49 439 This review was funded by National Natural Science Foundation of China (71403008)  
50  
51  
52 440 and Alliance for Health Policy and Systems Research, World Health Organization.  
53  
54

## 55 441 **Competing interests**

56  
57  
58 442 The authors declare that they have no competing interests.  
59  
60

## 443 Patient and Public Involvement

444 Not required.

## 445 Provenance and peer review

446 Not commissioned; externally peer reviewed.

## 447 Data sharing statement

448 There are no additional data available.

## 449 References

- 450 1. Council CCoCPoCaS. Guanyu shenhua yiyao weisheng tizhi gaige de yijian (Opinions on Deepening  
451 Health System Reform). 2009 [cited 2013 February 6]
- 452 2. Huang J, Shi L, Chen Y. Staff retention after the privatization of township-village health centers: a  
453 case study from the Haimen City of East China. *BMC health services research* 2013;13:136.  
454 doi: 10.1186/1472-6963-13-136 [published Online First: 2013/04/17]
- 455 3. China NHaFPCotPsRo. China health and family planning statistical yearbook 2016. *Beijing: Peking  
456 Union Medical College Publishing House;2017* (in Chinese)
- 457 4. CPC Central Committee SC. The plan for “Healthy China 2030”.2017  
458 [http://www.gov.cn/zhengce/2016-10/25/content\\_5124174.htm](http://www.gov.cn/zhengce/2016-10/25/content_5124174.htm). (in Chinese).
- 459 5. Yip WC, Hsiao WC, Chen W, et al. Early appraisal of China's huge and complex health-care reforms.  
460 *Lancet (London, England)* 2012;379(9818):833.
- 461 6. Li X LJ, Hu S, Cheng KK, De Maeseneer J, Meng Q, Mossialos E, Xu DR, Yip W, Zhang H, Krumholz  
462 HM, Jiang L, Hu S. The primary health-care system in China. *Lancet*  
463 2017;390(10112):2584-94.
- 464 7. Franco LM, Bennett S, Kanfer R. Health sector reform and public sector health worker motivation: a  
465 conceptual framework. *Social Science & Medicine* 2002;54(8):1255.
- 466 8. Dolea C, Adams O. Motivation of health care workers-review of theories and empirical evidence.  
467 *Cahiers de sociologie et de demographie medicales* 2005;45(1):135.
- 468 9. Fisher CD. Why do lay people believe that satisfaction and performance are correlated? possible  
469 sources of a commonsense theory. *Journal of Organizational Behavior* 2003;24(6):753–77.
- 470 10. Bennett S, Franco L. Health worker motivation and health sector reform. *Bethesda, Maryland, Abt  
471 Associates, Partnerships for Health Reform, [2000] 2000*
- 472 11. Alderfer CP. Existence, relatedness, and growth: Human needs in organizational settings.  
473 *Contemporary Sociology* 1974;3(6):511.
- 474 12. Zhang M, Yang R, Wang W, et al. Job satisfaction of urban community health workers after the  
475 2009 healthcare reform in China: a systematic review. *International Journal for Quality in  
476 Health Care Journal of the International Society for Quality in Health Care* 2015;28(1):14.



- 1  
2  
3 477 13. Zhang X, Fang P. Job satisfaction of village doctors during the new healthcare reforms in China.  
4 478 *Australian health review : a publication of the Australian Hospital Association*  
5 479 2016;40(2):225-33. doi: 10.1071/ah15205 [published Online First: 2016/02/26]  
6  
7 480 14. Wu D, Wang Y, Lam KF, et al. Health system reforms, violence against doctors and job satisfaction  
8 481 in the medical profession: a cross-sectional survey in Zhejiang Province, Eastern China. *BMJ*  
9 482 *open* 2014;4(12):e006431. doi: 10.1136/bmjopen-2014-006431 [published Online First:  
10 483 2015/01/02]  
11  
12 484 15. Li L, Zhang Z, Sun Z, et al. Relationships between actual and desired workplace characteristics and  
13 485 job satisfaction for community health workers in China: a cross-sectional study. *BMC family*  
14 486 *practice* 2014;15:180. doi: 10.1186/s12875-014-0180-y [published Online First: 2014/11/19]  
15  
16 487 16. Fang P, Liu X, Huang L, et al. Factors that influence the turnover intention of Chinese village  
17 488 doctors based on the investigation results of Xiangyang City in Hubei Province. *International*  
18 489 *journal for equity in health* 2014;13:84. doi: 10.1186/s12939-014-0084-4 [published Online  
19 490 First: 2014/11/05]  
20  
21 491 17. Luo Z, Bai X, Min R, et al. Factors influencing the work passion of Chinese community health  
22 492 service workers: an investigation in five provinces. *BMC family practice* 2014;15:77. doi:  
23 493 10.1186/1471-2296-15-77 [published Online First: 2014/06/03]  
24  
25 494 18. Ding H, Sun X, Chang WW, et al. A comparison of job satisfaction of community health workers  
26 495 before and after local comprehensive medical care reform: a typical field investigation in  
27 496 Central China. *PloS one* 2013;8(9):e73438. doi: 10.1371/journal.pone.0073438 [published  
28 497 Online First: 2013/09/24]  
29  
30 498 19. Hung LM, Shi L, Wang H, et al. Chinese primary care providers and motivating factors on  
31 499 performance. *Family practice* 2013;30(5):576-86. doi: 10.1093/fampra/cmt026 [published  
32 500 Online First: 2013/06/22]  
33  
34 501 20. Sun Y, Luo Z, Fang P. Factors influencing the turnover intention of Chinese community health  
35 502 service workers based on the investigation results of five provinces. *Journal of community*  
36 503 *health* 2013;38(6):1058-66. doi: 10.1007/s10900-013-9714-9 [published Online First:  
37 504 2013/06/19]  
38  
39 505 21. Shi L, Song K, Rane S, et al. Factors associated with job satisfaction by Chinese primary care  
40 506 providers. *Primary health care research & development* 2014;15(1):46-57. doi:  
41 507 10.1017/s1463423612000692 [published Online First: 2013/02/08]  
42  
43 508 22. Ge C, Fu J, Chang Y, et al. Factors associated with job satisfaction among Chinese community  
44 509 health workers: a cross-sectional study. *BMC public health* 2011;11:884. doi:  
45 510 10.1186/1471-2458-11-884 [published Online First: 2011/11/25]  
46  
47 511 23. Liu JA, Wang Q, Lu ZX. Job satisfaction and its modeling among township health center employees:  
48 512 a quantitative study in poor rural China. *BMC health services research* 2010;10:115. doi:  
49 513 10.1186/1472-6963-10-115 [published Online First: 2010/05/13]  
50  
51 514 24. Li T, Lei T, Sun F, et al. Determinants of village doctors' job satisfaction under China's health sector  
52 515 reform: a cross-sectional mixed methods study. *International journal for equity in health*  
53 516 2017;16(1):64.  
54  
55 517 25. Li L, Hu H, Zhou H, et al. Work stress, work motivation and their effects on job satisfaction in  
56 518 community health workers: a cross-sectional survey in China. 2014;4(6):e004897.  
57  
58 519 26. Health sector reform and public sector health worker motivation: a conceptual frameworkZhang  
59 520 M, Yan F, Wang W, et al. Is the effect of person-organisation fit on turnover intention  
60

- 1  
2  
3 521 mediated by job satisfaction? A survey of community health workers in China. *BMJ open*  
4 522 2017;7(2):e013872.
- 523 27. Wang H, Tang C, Zhao S, et al. Job Satisfaction among Health-Care Staff in Township Health  
524 Centers in Rural China: Results from a Latent Class Analysis. *International journal of*  
525 *environmental research and public health* 2017;14(10) doi: 10.3390/ijerph14101101  
526 [published Online First: 2017/09/25]
- 527 28. Lu Y, Hu XM, Huang XL, et al. Job satisfaction and associated factors among healthcare staff: a  
528 cross-sectional study in Guangdong Province, China. *BMJ open* 2016;6(7):e011388. doi:  
529 10.1136/bmjopen-2016-011388 [published Online First: 2016/07/21]
- 530 29. Zhou XD, Li L, Hesketh T. Health system reform in rural China: voices of healthworkers and  
531 service-users. *Social science & medicine (1982)* 2014;117:134-41. doi:  
532 10.1016/j.socscimed.2014.07.040 [published Online First: 2014/07/27]
- 533 30. Chen M, Lu J, Hao C, et al. Developing challenges in the urbanisation of village doctors in  
534 economically developed regions: A survey of 844 village doctors in Changzhou, China. *The*  
535 *Australian journal of rural health* 2015 doi: 10.1111/ajr.12159 [published Online First:  
536 2015/03/31]
- 537 31. Meng Q, Yuan J, Jing L, et al. Mobility of primary health care workers in China. *Human resources*  
538 *for health* 2009;7(1):24.
- 539 32. Wang J, Su J, Zuo H, et al. What interventions do rural doctors think will increase recruitment in  
540 rural areas: a survey of 2778 health workers in Beijing. *Human resources for health*  
541 2013;11:40. doi: 10.1186/1478-4491-11-40 [published Online First: 2013/08/24]
- 542 33. Song K, Scott A, Sivey P, et al. Improving Chinese primary care providers' recruitment and  
543 retention: a discrete choice experiment. *Health policy and planning* 2015;30(1):68-77. doi:  
544 10.1093/heapol/czt098 [published Online First: 2013/12/21]
- 545 34. Zhang S, Zhang W, Zhou H, et al. How China's new health reform influences village doctors'  
546 income structure: evidence from a qualitative study in six counties in China. *Human*  
547 *resources for health* 2015;13:26. doi: 10.1186/s12960-015-0019-1 [published Online First:  
548 2015/05/06]
- 549 35. Liu Q, Tian X, Tian J, et al. Evaluation of the effects of comprehensive reform on primary  
550 healthcare institutions in Anhui Province. *BMC health services research* 2014;14:268. doi:  
551 10.1186/1472-6963-14-268 [published Online First: 2014/06/20]
- 552 36. Ding Y, Smith HJ, Fei Y, et al. Factors influencing the provision of public health services by village  
553 doctors in Hubei and Jiangxi provinces, China. *Bulletin of the World Health Organization*  
554 2013;91(1):64-9. doi: 10.2471/blt.12.109447 [published Online First: 2013/02/12]
- 555 37. Zhao Y, Cui S, Yang J, et al. Basic public health services delivered in an urban community: a  
556 qualitative study. *Public health* 2011;125(1):37-45. doi: 10.1016/j.puhe.2010.09.003  
557 [published Online First: 2010/12/15]
- 558 38. Zhou H, Zhang W, Zhang S, et al. Health providers' perspectives on delivering public health  
559 services under the contract service policy in rural China: evidence from Xinjian County. *BMC*  
560 *health services research* 2015;15:75. doi: 10.1186/s12913-015-0739-x [published Online First:  
561 2015/04/19]
- 562 39. Zhang M, Wang W, Millar R, et al. Coping and compromise: a qualitative study of how primary  
563 health care providers respond to health reform in China. *Human resources for health*  
564 2017;15(1):50. doi: 10.1186/s12960-017-0226-z [published Online First: 2017/08/06]

- 1  
2  
3 565 40. Zhang T, Liu C, Ren J, et al. Perceived impacts of the national essential medicines system: a  
4 566 cross-sectional survey of health workers in urban community health services in China. *BMJ*  
5 567 *open* 2017;7(7):e014621. doi: 10.1136/bmjopen-2016-014621 [published Online First:  
6 568 2017/07/13]
- 7  
8 569 41. Feng D, Zhang L, Xiang YX, et al. Satisfaction of village doctors with the township and village health  
9 570 services integration policy in the western minority-inhabited areas of China. *Journal of*  
10 571 *Huazhong University of Science and Technology Medical sciences = Hua zhong ke ji da xue*  
11 572 *xue bao Yi xue Ying De wen ban = Huazhong keji daxue xuebao Yixue Yingdewen ban*  
12 573 2017;37(1):11-19. doi: 10.1007/s11596-017-1687-y [published Online First: 2017/02/23]
- 13  
14 574 42. Li T, Lei T, Xie Z, et al. Determinants of basic public health services provision by village doctors in  
15 575 China: using non-communicable diseases management as an example. *BMC health services*  
16 576 *research* 2016;16:42. doi: 10.1186/s12913-016-1276-y [published Online First: 2016/02/06]
- 17  
18 577 43. Song Y, Bian Y, Li L. Current perspectives on China's national essential medicine system: primary  
19 578 care provider and patient views. *BMC health services research* 2016;16:30. doi:  
20 579 10.1186/s12913-016-1283-z [published Online First: 2016/01/28]
- 21  
22 580 44. Li X, Cochran C, Lu J, et al. Understanding the shortage of village doctors in China and solutions  
23 581 under the policy of basic public health service equalization: evidence from Changzhou. *The*  
24 582 *International journal of health planning and management* 2015;30(1):E42-55. doi:  
25 583 10.1002/hpm.2258 [published Online First: 2014/07/06]
- 26  
27 584 45. Chen Q, Yang L, Feng Q. Job Satisfaction Analysis in Rural China: A Qualitative Study of Doctors in a  
28 585 Township Hospital. 2017;2017:1964087. doi: 10.1155/2017/1964087
- 29  
30 586 46. Lin WQ, Wu J, Yuan LX, et al. Workplace Violence and Job Performance among Community  
31 587 Healthcare Workers in China: The Mediator Role of Quality of Life. *International journal of*  
32 588 *environmental research and public health* 2015;12(11):14872-86. doi:  
33 589 10.3390/ijerph121114872 [published Online First: 2015/11/28]
- 34  
35 590 47. Li X, Liu J, Huang J, et al. An analysis of the current educational status and future training needs of  
36 591 China's rural doctors in 2011. *Postgraduate medical journal* 2013;89(1050):202-8. doi:  
37 592 10.1136/postgradmedj-2012-131094 [published Online First: 2013/02/08]
- 38  
39 593 48. Mo Y, Hu G. Unmet needs in health training among nurses in rural Chinese township health  
40 594 centers: a cross-sectional hospital-based study. 2017;14:22. doi: 10.1016/j.ejon.2017.07.003  
41 595 10.3352/jeehp.2017.14.22 [published Online First: 2017/10/17]
- 42  
43 596 49. Henderson LN, Tulloch J. Incentives for retaining and motivating health workers in Pacific and  
44 597 Asian countries. *Human resources for health* 2008;6(1):18.
- 45  
46 598 50. Li T, Lei T, Zheng X, et al. Determinants of basic public health services provision by village doctors  
47 599 in China: using non-communicable diseases management as an example. *BMC health services*  
48 600 *research* 2015;16(1):42.  
49 601  
50  
51  
52  
53  
54  
55  
56  
57  
58  
59  
60

602 **Figure legends**

603 **Figure 1.** PRISMA diagram.

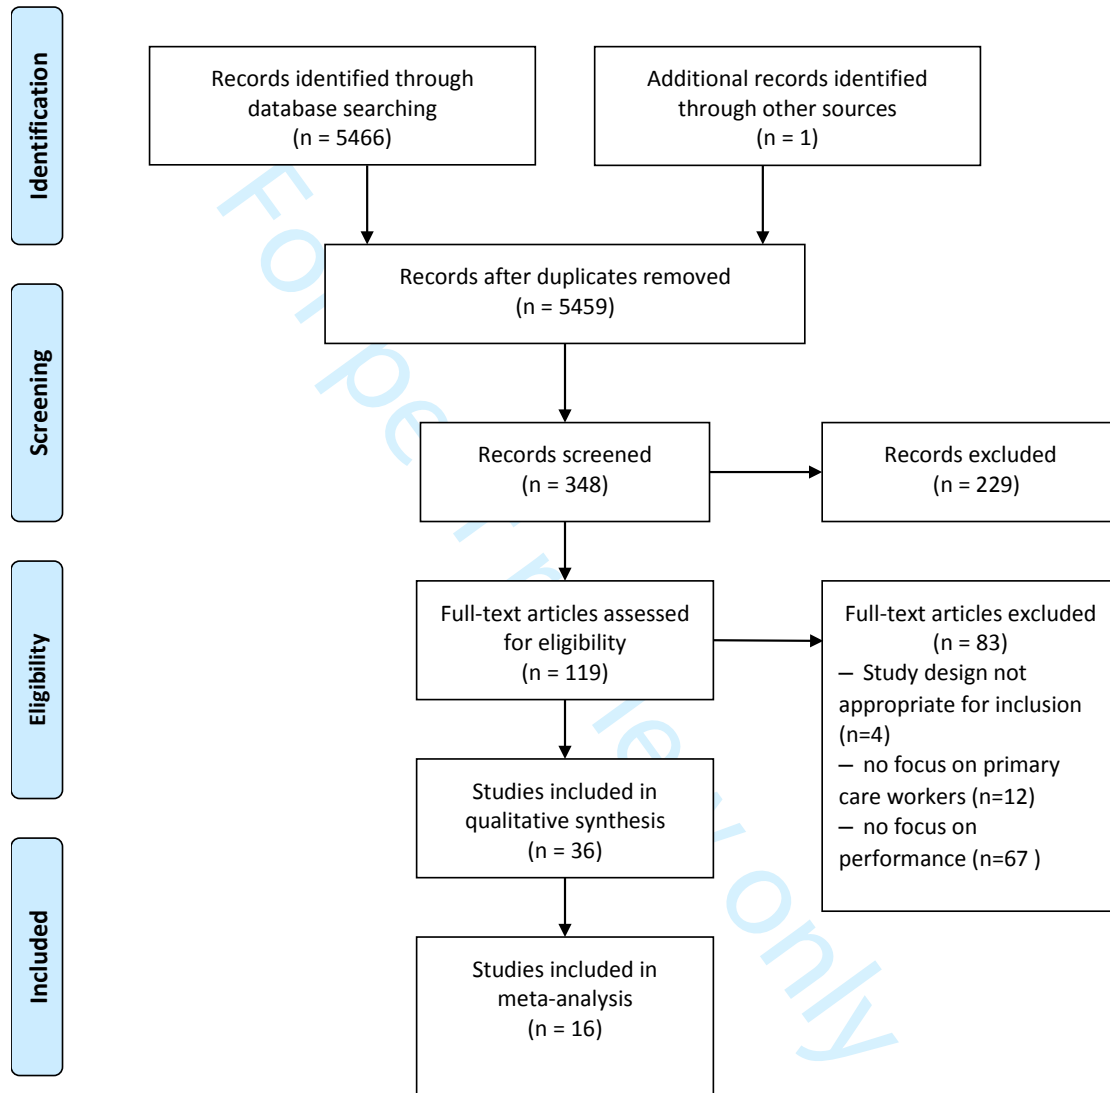

604

605 **Figure 2.** Job satisfaction score among primary care workers across different regions in China

606 **Figure 3.** Forest plot of the Job satisfaction score among primary care workers

607 **Tables**608 **Table 1.** Motivating factors for primary care workers609 **Table 2** Means of overall job satisfaction score among primary care workers

| Study                  | No. of included studies | Mean |
|------------------------|-------------------------|------|
| All included studies   | 20                      | 3.30 |
| Studies in urban areas | 9                       | 3.35 |
| Studies in rural areas | 7                       | 3.06 |

For peer review only

**Table 1**

| Motivating factor               | Definition                                                                                                 | Motivation to stay | Motivation to join/leave | Number of selected studies reporting the factors |
|---------------------------------|------------------------------------------------------------------------------------------------------------|--------------------|--------------------------|--------------------------------------------------|
| <b>Existence</b>                |                                                                                                            |                    |                          |                                                  |
| Financial incentives            | Basic salary, bonus, benefits (insurances, vacation, etc.)                                                 | 22                 | 5                        | 26                                               |
| Workload                        | Hours of work, the amount of work done, flexibility in scheduling                                          | 12                 | 1                        | 13                                               |
| Work conditions                 | Work environment, job stability, job security,                                                             | 14                 | 2                        | 15                                               |
| <b>Relatedness</b>              |                                                                                                            |                    |                          |                                                  |
| Living environment              | Geographical location and socioeconomic level of workplace                                                 | 4                  | 2                        | 6                                                |
| Recognition in society          | Patients' respect, workplace violence, social status                                                       | 11                 | 2                        | 13                                               |
| Work itself                     | Nature of work (interest, meaningfulness, enjoyment), Job fulfilment, Job achievement, work enthusiasm     | 17                 | 1                        | 17                                               |
| Working relationships           | Relationships with coworkers/subordinates/nurses, communication                                            | 11                 | 0                        | 11                                               |
| <b>Growth</b>                   |                                                                                                            |                    |                          |                                                  |
| Career advancement              | opportunities for professional development                                                                 | 17                 | 3                        | 19                                               |
| Training                        | Support for training and education, opportunity to learn new skills and new knowledge                      | 11                 | 2                        | 13                                               |
| Rewards                         | recognition, appreciation, contingent rewards,                                                             | 9                  | 0                        | 9                                                |
| Management                      | Supervision(level of competence, fairness, interest in subordinates), relationship with superior           | 8                  | 1                        | 9                                                |
| Autonomy                        | Opportunities to do work making own decisions, opportunity to utilize your professional skills and talents | 14                 | 0                        | 14                                               |
| <b>System and policy</b>        |                                                                                                            |                    |                          |                                                  |
| The health-care reform policies | Putting organizational policies into practice                                                              | 18                 | 1                        | 18                                               |

1  
2  
3  
4  
5  
6  
7  
8  
9  
10  
11  
12  
13  
14  
15  
16  
17  
18  
19  
20  
21  
22  
23  
24  
25  
26  
27  
28  
29  
30  
31  
32  
33  
34  
35  
36  
37  
38  
39  
40  
41  
42  
43  
44  
45  
46

For peer review only

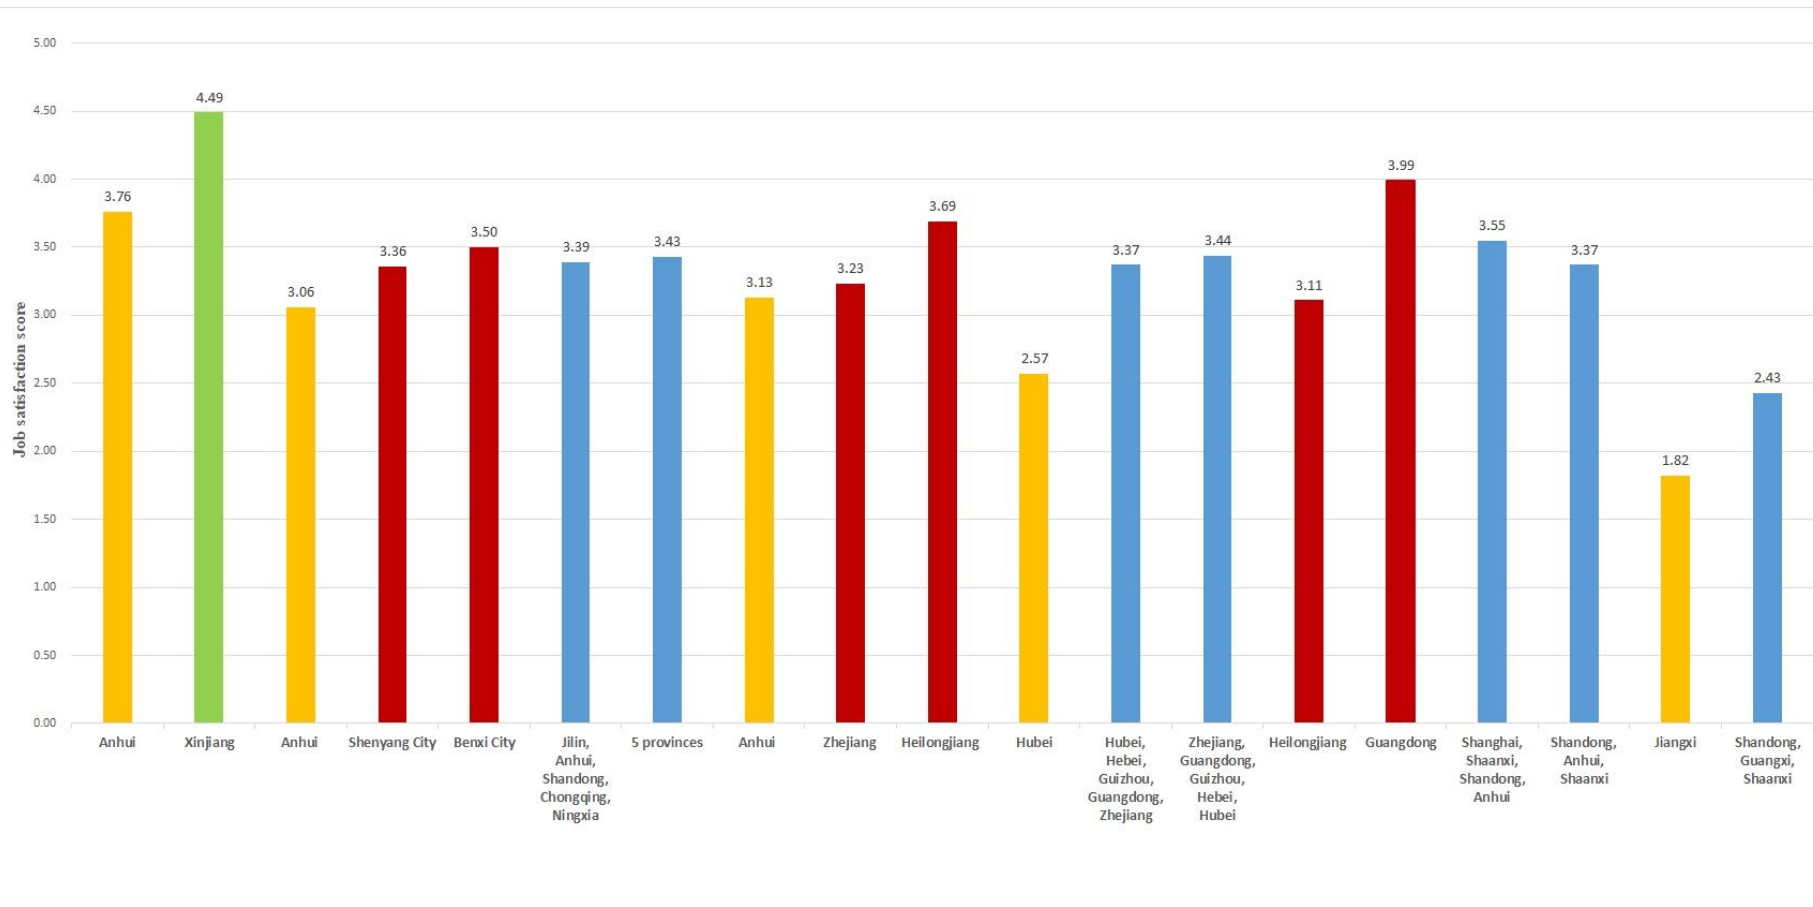

1  
2  
3  
4  
5  
6  
7  
8  
9  
10  
11  
12  
13  
14  
15  
16  
17  
18  
19  
20  
21  
22  
23  
24  
25  
26  
27  
28  
29  
30  
31  
32  
33  
34  
35  
36  
37  
38  
39  
40  
41  
42  
43  
44  
45  
46



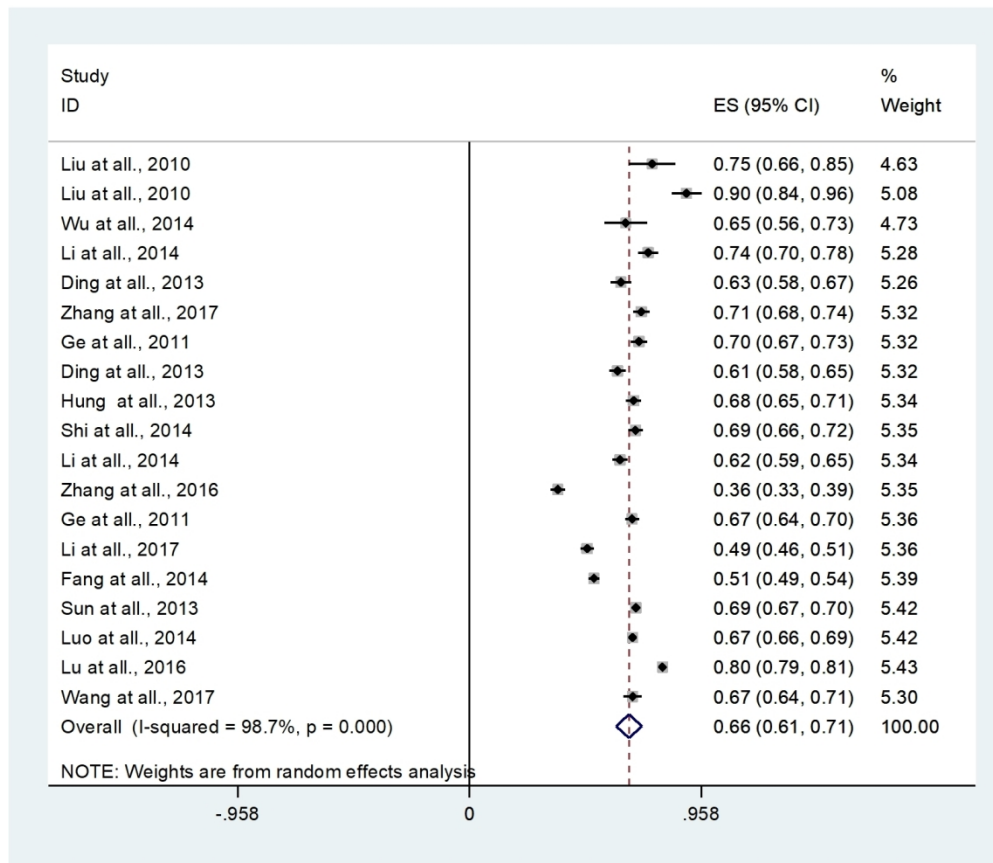

34 Figure 3. Forest plot of the Job satisfaction score among primary care workers

35 143x124mm (288 x 288 DPI)

## Supplementary Appendix

### 1. Search terms

(China[Title/Abstract] OR Chinese[Title/Abstract]) AND ("primary health care"[Mesh] OR "General Practice"[Mesh] OR "General Practitioners"[Mesh] OR "Physicians, Family"[Mesh] OR "Community Health Services"[Mesh] OR "Delivery of Health Care"[Mesh] OR "township hospital"[Title/Abstract] OR "township health center"[Title/Abstract] OR "township health centre"[Title/Abstract] OR "community health station"[Title/Abstract] OR "village clinic"[Title/Abstract] OR "community health center"[Title/Abstract] OR "community health centre"[Title/Abstract]) AND ("manpower"[Mesh] OR "Education, Public Health Professional"[Mesh] OR "Education, Professional"[Mesh] OR "Education, Medical, Continuing"[Mesh] OR "Professionalism"[Mesh] OR "Career Choice"[Mesh] OR "Career Mobility"[Mesh] OR "human resources"[Title/Abstract] OR "retention"[Title/Abstract] OR "incentives"[Title/Abstract] OR "salary"[Title/Abstract] OR "professional medical master"[Title/Abstract] OR Motivation[Mesh] OR "Salaries and Fringe Benefits"[Mesh] OR "Staff Development"[Mesh] OR recruit[Title/Abstract] OR recruited[Title/Abstract] OR recruits[Title/Abstract] OR migration[Title/Abstract] OR migrate[Title/Abstract] OR migrating[Title/Abstract] OR migrated[Title/Abstract] OR migrates[Title/Abstract] OR immigration[Title/Abstract] OR immigrate[Title/Abstract] OR immigrating[Title/Abstract] OR immigrated[Title/Abstract] OR immigrates[Title/Abstract] OR emigration[Title/Abstract] OR emigrate[Title/Abstract] OR emigrating[Title/Abstract] OR emigrated[Title/Abstract] OR emigrates[Title/Abstract] OR mobility[Title/Abstract] OR turnover[Title/Abstract] OR "brain drain"[Title/Abstract]) AND ((eng[Language]) OR chi[Language]) NOT "Autobiography"[ptyp] NOT "Bibliography"[ptyp] NOT "Biography"[ptyp] NOT "Consensus Development Conference"[ptyp] NOT "Consensus Development Conference, NIH"[ptyp] NOT "Corrected and Republished Article"[ptyp] NOT "Dataset"[ptyp] NOT "Dictionary"[ptyp] NOT "Directory"[ptyp] NOT "Duplicate Publication"[ptyp] NOT "Electronic Supplementary Materials"[ptyp] NOT "Festschrift"[ptyp] NOT "Interactive Tutorial"[ptyp] NOT "Legal Cases"[ptyp] NOT "Letter"[ptyp] NOT "News"[ptyp] NOT "Patient Education Handout"[ptyp] NOT "Periodical Index"[ptyp] NOT "Personal Narratives"[ptyp] NOT "Portraits"[ptyp] NOT "Published Erratum"[ptyp] NOT "Retracted Publication"[ptyp] NOT "Retraction of Publication"[ptyp] NOT "Twin Study"[ptyp] NOT "Video-Audio Media"[ptyp] NOT "Webcasts"[ptyp].

1  
2  
3  
4  
5  
6  
7  
8  
9  
10  
11  
12  
13  
14  
15  
16  
17  
18  
19  
20  
21  
22  
23  
24  
25  
26  
27  
28  
29  
30  
31  
32  
33  
34  
35  
36  
37  
38  
39  
40  
41  
42  
43  
44  
45  
46

**2. List of included studies' general characteristics**

| <b>Study [Citation]</b>    | <b>Study period</b> | <b>Study design</b> | <b>Province</b> | <b>Area</b> | <b>Institution</b>      | <b>Objective</b>                                                                                                                                                                   | <b>Key motivation conclusions</b>                                                                                                                                              | <b>Influencing factors</b>                                                                                                                                                                                                     |
|----------------------------|---------------------|---------------------|-----------------|-------------|-------------------------|------------------------------------------------------------------------------------------------------------------------------------------------------------------------------------|--------------------------------------------------------------------------------------------------------------------------------------------------------------------------------|--------------------------------------------------------------------------------------------------------------------------------------------------------------------------------------------------------------------------------|
| Zhang <i>et al.</i> , 2016 | 2014                | Quantitative study  | Jiangxi         | Rural       | Village Clinic          | To assess village doctors' job satisfaction during the reforms and to explore factors affecting job satisfaction.                                                                  | Low job satisfaction. The top three items leading to dissatisfaction were pay and the amount of work that had to be done, opportunities for job promotion and work conditions. | Marriage, income, intention to leave, satisfaction with learning and training, social status, relationship with patients and satisfaction with the new healthcare reforms were significantly associated with job satisfaction. |
| Lin <i>et al.</i> , 2015   | 2013.9-2014.4       | Quantitative study  | Guangdong       | Urban       | Community Health Centre | To explore the impact of workplace violence on job performance and quality of life of community healthcare workers in China, especially the relationship of these three variables. | Workplace violence among community healthcare workers is prevalent in China.                                                                                                   | The workplace violence had negative effects on the job performance and quality of life of CHCs' workers.                                                                                                                       |

|    |                  |         |              |               |       |           |                      |                           |                           |
|----|------------------|---------|--------------|---------------|-------|-----------|----------------------|---------------------------|---------------------------|
| 1  |                  |         |              |               |       |           |                      |                           |                           |
| 2  |                  |         |              |               |       |           |                      |                           |                           |
| 3  |                  |         |              |               |       |           |                      |                           |                           |
| 4  |                  |         |              |               |       |           |                      |                           |                           |
| 5  | Zhang            | 2013.8- | Qualitative  | Jiangsu,      | Rural | Village   | To investigate the   | The health-care reform    | Several policies such as  |
| 6  | <i>at all.</i> , | 2014.1  | Study        | Henan,        |       | Clinic    | village doctors'     | policies have had lasting | the National Essential    |
| 7  | 2015             |         |              | Jiangxi,      |       |           | income structure and | impacts on village        | Medicines System,         |
| 8  |                  |         |              | Heilongjiang, |       |           | analyze how these    | doctors' income           | Integrated management,    |
| 9  |                  |         |              | Sichuan,      |       |           | health policies      | structure since the       | National Basic Public     |
| 10 |                  |         |              | Gansu.        |       |           | influenced it.       | policies' implementation  | Health Services, New      |
| 11 |                  |         |              |               |       |           |                      | in 2009.                  | Rural Cooperative         |
| 12 |                  |         |              |               |       |           |                      |                           | Medical Scheme had        |
| 13 |                  |         |              |               |       |           |                      |                           | major impact on village   |
| 14 |                  |         |              |               |       |           |                      |                           | doctors.                  |
| 15 |                  |         |              |               |       |           |                      |                           |                           |
| 16 |                  |         |              |               |       |           |                      |                           |                           |
| 17 |                  |         |              |               |       |           |                      |                           |                           |
| 18 | Wu <i>at</i>     | 2012    | Quantitative | Zhejiang      | Both  | Community | To explore the       | Low job satisfaction.     | Doctors in the provincial |
| 19 | <i>all.</i> ,    |         | study        |               |       | Health    | factors influencing  | Primary care doctors      | hospital appeared to be   |
| 20 | 2014             |         |              |               |       | Centre;   | doctors' job         | were the least            | the most dissatisfied     |
| 21 |                  |         |              |               |       | Township  | satisfaction and     | dissatisfied with the     | group, and primary care   |
| 22 |                  |         |              |               |       | Health    | morale in China, in  | income and                | physicians were most      |
| 23 |                  |         |              |               |       | Centre    | the context of the   | opportunities for         | satisfied with their work |
| 24 |                  |         |              |               |       |           | ongoing health       | promotion.                | and the causes of         |
| 25 |                  |         |              |               |       |           | system reforms and   | Patients were becoming    | dissatisfaction fall into |
| 26 |                  |         |              |               |       |           | the deteriorating    | more aggressive in their  | three main areas: low     |
| 27 |                  |         |              |               |       |           | doctor-patient       | demands and there was     | income, heavy workload    |
| 28 |                  |         |              |               |       |           | relationship.        | an increasing trend of    | and patient aggression.   |
| 29 |                  |         |              |               |       |           |                      |                           |                           |
| 30 |                  |         |              |               |       |           |                      |                           |                           |
| 31 |                  |         |              |               |       |           |                      |                           |                           |
| 32 |                  |         |              |               |       |           |                      |                           |                           |
| 33 |                  |         |              |               |       |           |                      |                           |                           |
| 34 |                  |         |              |               |       |           |                      |                           |                           |
| 35 |                  |         |              |               |       |           |                      |                           |                           |
| 36 |                  |         |              |               |       |           |                      |                           |                           |
| 37 |                  |         |              |               |       |           |                      |                           |                           |
| 38 |                  |         |              |               |       |           |                      |                           |                           |
| 39 |                  |         |              |               |       |           |                      |                           |                           |
| 40 |                  |         |              |               |       |           |                      |                           |                           |
| 41 |                  |         |              |               |       |           |                      |                           |                           |
| 42 |                  |         |              |               |       |           |                      |                           |                           |
| 43 |                  |         |              |               |       |           |                      |                           |                           |
| 44 |                  |         |              |               |       |           |                      |                           |                           |
| 45 |                  |         |              |               |       |           |                      |                           |                           |
| 46 |                  |         |              |               |       |           |                      |                           |                           |

1  
2  
3  
4  
5  
6  
7  
8  
9  
10  
11  
12  
13  
14  
15  
16  
17  
18  
19  
20  
21  
22  
23  
24  
25  
26  
27  
28  
29  
30  
31  
32  
33  
34  
35  
36  
37  
38  
39  
40  
41  
42  
43  
44  
45  
46

|                            |            |                    |              |       |                         |                                                                                                                                                                                          |                                                                                                                                                                                                                                        |                                                                                                                                                                                                                                                                                                                       |
|----------------------------|------------|--------------------|--------------|-------|-------------------------|------------------------------------------------------------------------------------------------------------------------------------------------------------------------------------------|----------------------------------------------------------------------------------------------------------------------------------------------------------------------------------------------------------------------------------------|-----------------------------------------------------------------------------------------------------------------------------------------------------------------------------------------------------------------------------------------------------------------------------------------------------------------------|
| Li <i>at all.</i> , 2014   | 2012       | Quantitative study | Heilongjiang | Urban | Community Health Centre | To assess the determinants of job satisfaction in community health workers in one Chinese province.                                                                                      | Overall job satisfaction was higher than extrinsic job satisfaction and lower than intrinsic job satisfaction. All desired workplace characteristics were higher than the associated actual workplace characteristics.                 | The main determinants of job satisfaction were occupation, years worked in health service institution, and five subscales representing the gap between desired and actual workplace characteristics, which were system and policy; fringe benefits; working relationship; professional development; and remuneration. |
| Fang <i>at all.</i> , 2014 | 2012.07-08 | Quantitative study | Hubei        | Rural | Village Clinic          | To analyzes the factors that influence the turnover intention of village doctors by investigating village clinic workers in rural areas, particularly in Xiangyang City, Hubei Province. | Village doctors were most dissatisfied with my pay and the amount of work I do, the chances for advancement on this job, and the work conditions. Highlight the influence of job satisfaction on turnover intention of village doctors | Income satisfaction, the way organization policies are put into practice, my pay and the amount of work I do, the chances for advancement on this job and the work conditions were significantly related to the turnover intention of village doctors.                                                                |

|    |                  |         |             |           |       |          |                        |                            |                              |
|----|------------------|---------|-------------|-----------|-------|----------|------------------------|----------------------------|------------------------------|
| 1  |                  |         |             |           |       |          |                        |                            |                              |
| 2  |                  |         |             |           |       |          |                        |                            |                              |
| 3  |                  |         |             |           |       |          |                        |                            |                              |
| 4  |                  |         |             |           |       |          |                        |                            |                              |
| 5  | Zhou             | 2013.1- | Qualitative | Zhejiang, | Rural | Township | To explore the         | Some elements of the       | The health workers'          |
| 6  | <i>at all.</i> , | 3       | Study       | Yunnan    |       | Health   | impacts of these       | reforms may actually be    | intention was mostly         |
| 7  | 2014             |         |             |           |       | Centre   | reforms on health      | undermining primary        | blamed on the loss of        |
| 8  |                  |         |             |           |       |          | workers and service    | care. While the new        | income and incentives        |
| 9  |                  |         |             |           |       |          | users at township      | health insurance system    | and in the larger hospitals, |
| 10 |                  |         |             |           |       |          | level, which has been  | was popular among          | on the essential drug list,  |
| 11 |                  |         |             |           |       |          | the major target of    | service-users, it was      | and the way it limits        |
| 12 |                  |         |             |           |       |          | the first phase of the | criticized for             | clinical autonomy and the    |
| 13 |                  |         |             |           |       |          | reforms.               | contributing to            | provision of specialist      |
| 14 |                  |         |             |           |       |          |                        | fast-growing medical       | services.                    |
| 15 |                  |         |             |           |       |          |                        | costs, and for an          |                              |
| 16 |                  |         |             |           |       |          |                        | imbalance of benefits      |                              |
| 17 |                  |         |             |           |       |          |                        | between outpatient and     |                              |
| 18 |                  |         |             |           |       |          |                        | inpatient services. Salary |                              |
| 19 |                  |         |             |           |       |          |                        | reform has guaranteed      |                              |
| 20 |                  |         |             |           |       |          |                        | health workers' income,    |                              |
| 21 |                  |         |             |           |       |          |                        | but greatly reduced their  |                              |
| 22 |                  |         |             |           |       |          |                        | incentives. The essential  |                              |
| 23 |                  |         |             |           |       |          |                        | drug list removed          |                              |
| 24 |                  |         |             |           |       |          |                        | perverse incentives to     |                              |
| 25 |                  |         |             |           |       |          |                        | overprescribe, but led to  |                              |
| 26 |                  |         |             |           |       |          |                        | falls in income for health |                              |
| 27 |                  |         |             |           |       |          |                        | workers, and loss of       |                              |
| 28 |                  |         |             |           |       |          |                        | autonomy for doctors.      |                              |
| 29 |                  |         |             |           |       |          |                        |                            |                              |
| 30 |                  |         |             |           |       |          |                        |                            |                              |
| 31 |                  |         |             |           |       |          |                        |                            |                              |
| 32 |                  |         |             |           |       |          |                        |                            |                              |
| 33 |                  |         |             |           |       |          |                        |                            |                              |
| 34 |                  |         |             |           |       |          |                        |                            |                              |
| 35 |                  |         |             |           |       |          |                        |                            |                              |
| 36 |                  |         |             |           |       |          |                        |                            |                              |
| 37 |                  |         |             |           |       |          |                        |                            |                              |
| 38 |                  |         |             |           |       |          |                        |                            |                              |
| 39 |                  |         |             |           |       |          |                        |                            |                              |
| 40 |                  |         |             |           |       |          |                        |                            |                              |
| 41 |                  |         |             |           |       |          |                        |                            |                              |
| 42 |                  |         |             |           |       |          |                        |                            |                              |
| 43 |                  |         |             |           |       |          |                        |                            |                              |
| 44 |                  |         |             |           |       |          |                        |                            |                              |
| 45 |                  |         |             |           |       |          |                        |                            |                              |
| 46 |                  |         |             |           |       |          |                        |                            |                              |

1  
2  
3  
4  
5  
6  
7  
8  
9  
10  
11  
12  
13  
14  
15  
16  
17  
18  
19  
20  
21  
22  
23  
24  
25  
26  
27  
28  
29  
30  
31  
32  
33  
34  
35  
36  
37  
38  
39  
40  
41  
42  
43  
44  
45  
46

|                          |           |                    |       |      |                                                                          |                                                                                            |                                                                                                                                                                                                                                                                                                                                                                                                                                                                                                     |                                                                                                                                                                |
|--------------------------|-----------|--------------------|-------|------|--------------------------------------------------------------------------|--------------------------------------------------------------------------------------------|-----------------------------------------------------------------------------------------------------------------------------------------------------------------------------------------------------------------------------------------------------------------------------------------------------------------------------------------------------------------------------------------------------------------------------------------------------------------------------------------------------|----------------------------------------------------------------------------------------------------------------------------------------------------------------|
| Liu <i>et al.</i> , 2014 | 2009-2010 | Mixed method study | Anhui | Both | Township Health Centre; Village Clinic; Community Health Centre/ Station | To conduct an initial assessment of the effects of specific parts of the reforms in Anhui. | The reform of primary healthcare institutions in Anhui has improved the personnel structures surrounding frontline healthcare workers, increased their incomes, improved work efficiency, and changed the compensation patterns of primary healthcare institutions, improved hardware, reduced drug prices, and, to some extent, improved the diagnosis and treatment structure. However, the reforms have not radically changed the behavior of medical workers or the visit patterns of patients. | Two problems emerged from the reforms. First, the enthusiasm of medical staff decreased, and second, the supply of drugs could not adequately meet the demand. |
|--------------------------|-----------|--------------------|-------|------|--------------------------------------------------------------------------|--------------------------------------------------------------------------------------------|-----------------------------------------------------------------------------------------------------------------------------------------------------------------------------------------------------------------------------------------------------------------------------------------------------------------------------------------------------------------------------------------------------------------------------------------------------------------------------------------------------|----------------------------------------------------------------------------------------------------------------------------------------------------------------|

For peer review only

|    |               |       |              |             |       |           |                      |                         |                            |
|----|---------------|-------|--------------|-------------|-------|-----------|----------------------|-------------------------|----------------------------|
| 1  |               |       |              |             |       |           |                      |                         |                            |
| 2  |               |       |              |             |       |           |                      |                         |                            |
| 3  |               |       |              |             |       |           |                      |                         |                            |
| 4  |               |       |              |             |       |           |                      |                         |                            |
| 5  | Luo <i>at</i> | maybe | Quantitative | Hubei ,     | Urban | Community | To analyze and       | Low passion for current | The related factors that   |
| 6  | <i>all.</i> , | 2012  | study        | Guizhou,    |       | Health    | determine the main   | work.                   | influence CHS workers'     |
| 7  | 2014          |       |              | Hebei ,     |       | Centre    | related factors that | Workers were most       | work passion are           |
| 8  |               |       |              | Guangdong , |       |           | influence work       | dissatisfied with the   | socio-demographic          |
| 9  |               |       |              | Zhejiang    |       |           | passion of CHS       | balance between         | factors such as age, and   |
| 10 |               |       |              |             |       |           | workers by           | remuneration and        | years of employment, and   |
| 11 |               |       |              |             |       |           | investigating CHS    | workload, job promotion | other work-related factors |
| 12 |               |       |              |             |       |           | workers from five    | opportunities and most  | such as learning and       |
| 13 |               |       |              |             |       |           | Chinese provinces.   | dissatisfied with the   | training opportunities,    |
| 14 |               |       |              |             |       |           |                      | balance between         | compensation packages,     |
| 15 |               |       |              |             |       |           |                      | remuneration and        | work stress, and personal  |
| 16 |               |       |              |             |       |           |                      | workload, job promotion | development                |
| 17 |               |       |              |             |       |           |                      | opportunities.          | opportunities.             |
| 18 |               |       |              |             |       |           |                      |                         |                            |
| 19 |               |       |              |             |       |           |                      |                         |                            |
| 20 |               |       |              |             |       |           |                      |                         |                            |
| 21 |               |       |              |             |       |           |                      |                         |                            |
| 22 |               |       |              |             |       |           |                      |                         |                            |
| 23 |               |       |              |             |       |           |                      |                         |                            |
| 24 |               |       |              |             |       |           |                      |                         |                            |
| 25 |               |       |              |             |       |           |                      |                         |                            |
| 26 |               |       |              |             |       |           |                      |                         |                            |
| 27 |               |       |              |             |       |           |                      |                         |                            |
| 28 |               |       |              |             |       |           |                      |                         |                            |
| 29 |               |       |              |             |       |           |                      |                         |                            |
| 30 |               |       |              |             |       |           |                      |                         |                            |
| 31 |               |       |              |             |       |           |                      |                         |                            |
| 32 |               |       |              |             |       |           |                      |                         |                            |
| 33 |               |       |              |             |       |           |                      |                         |                            |
| 34 |               |       |              |             |       |           |                      |                         |                            |
| 35 |               |       |              |             |       |           |                      |                         |                            |
| 36 |               |       |              |             |       |           |                      |                         |                            |
| 37 |               |       |              |             |       |           |                      |                         |                            |
| 38 |               |       |              |             |       |           |                      |                         |                            |
| 39 |               |       |              |             |       |           |                      |                         |                            |
| 40 |               |       |              |             |       |           |                      |                         |                            |
| 41 |               |       |              |             |       |           |                      |                         |                            |
| 42 |               |       |              |             |       |           |                      |                         |                            |
| 43 |               |       |              |             |       |           |                      |                         |                            |
| 44 |               |       |              |             |       |           |                      |                         |                            |
| 45 |               |       |              |             |       |           |                      |                         |                            |
| 46 |               |       |              |             |       |           |                      |                         |                            |



1  
2  
3  
4  
5  
6  
7  
8  
9  
10  
11  
12  
13  
14  
15  
16  
17  
18  
19  
20  
21  
22  
23  
24  
25  
26  
27  
28  
29  
30  
31  
32  
33  
34  
35  
36  
37  
38  
39  
40  
41  
42  
43  
44  
45  
46

|                                  |                      |                       |       |       |                               |                                                                                                                                                                                                                                                                                    |                                                                                                                                                                                                                                         |                                                                                                                                                                                                                                                                                                                                                                                                                                          |
|----------------------------------|----------------------|-----------------------|-------|-------|-------------------------------|------------------------------------------------------------------------------------------------------------------------------------------------------------------------------------------------------------------------------------------------------------------------------------|-----------------------------------------------------------------------------------------------------------------------------------------------------------------------------------------------------------------------------------------|------------------------------------------------------------------------------------------------------------------------------------------------------------------------------------------------------------------------------------------------------------------------------------------------------------------------------------------------------------------------------------------------------------------------------------------|
| Ding<br><i>at all.</i> ,<br>2013 | 2009<br>v.s.<br>2012 | Quantitative<br>study | Anhui | Urban | Community<br>Health<br>Centre | To compare the job<br>satisfaction (JS) of<br>community health<br>workers (CHWs)<br>before and after the<br>local comprehensive<br>medical care reform<br>(LCMR) in Anhui<br>Province to provide<br>evidence for<br>improving the<br>LCMR policy to<br>increase the JS of<br>CHWs. | After two years'<br>implementation of the<br>LCMR, CHWs' total JS<br>have a small<br>improvement.<br>CHWs have lower<br>satisfaction in the<br>dimensions of pay,<br>promotion and benefits<br>dimensions before and<br>after the LCMR. | The average scores of<br>total JS and satisfaction<br>with pay, contingent<br>rewards, operating<br>procedures and<br>communication in the<br>effect evaluation survey<br>were statistically<br>significantly higher than<br>those of the baseline<br>survey. The average score<br>of satisfaction with<br>promotion in the effect<br>evaluation survey was<br>statistically significantly<br>lower than that in the<br>baseline survey. |
|----------------------------------|----------------------|-----------------------|-------|-------|-------------------------------|------------------------------------------------------------------------------------------------------------------------------------------------------------------------------------------------------------------------------------------------------------------------------------|-----------------------------------------------------------------------------------------------------------------------------------------------------------------------------------------------------------------------------------------|------------------------------------------------------------------------------------------------------------------------------------------------------------------------------------------------------------------------------------------------------------------------------------------------------------------------------------------------------------------------------------------------------------------------------------------|

For peer review only

|    |                  |       |              |            |       |           |                        |                           |                              |
|----|------------------|-------|--------------|------------|-------|-----------|------------------------|---------------------------|------------------------------|
| 1  |                  |       |              |            |       |           |                        |                           |                              |
| 2  |                  |       |              |            |       |           |                        |                           |                              |
| 3  |                  |       |              |            |       |           |                        |                           |                              |
| 4  |                  |       |              |            |       |           |                        |                           |                              |
| 5  | Hung             | 2011  | Quantitative | Jilin,     | Both  | Township  | To provide an          | There were greater needs  | The most important           |
| 6  | <i>at all.</i> , |       | study        | Shandong,  |       | Health    | overview of major      | for improvement in rural  | motivating factors for       |
| 7  | 2013             |       |              | Anhui,     |       | Centre;   | performance            | than urban settings,      | PCPs to improve              |
| 8  |                  |       |              | Chongqing, |       | Village   | motivating factors     | especially in living      | performance were             |
| 9  |                  |       |              | Ningxia    |       | Clinic;   | for primary care       | environment.              | professional development,    |
| 10 |                  |       |              |            |       | Community | providers (PCPs) in    | Types of PCPs were        | training opportunities,      |
| 11 |                  |       |              |            |       | Health    | China and examine      | associated with needs for | living environment,          |
| 12 |                  |       |              |            |       | Centre/   | associations between   | improvement in different  | benefits, working            |
| 13 |                  |       |              |            |       | Station   | these factors and      | factors. There were more  | conditions and income.       |
| 14 |                  |       |              |            |       |           | individual and         | needs from nurses and     |                              |
| 15 |                  |       |              |            |       |           | practice setting       | village doctors.          |                              |
| 16 |                  |       |              |            |       |           | characteristics.       |                           |                              |
| 17 |                  |       |              |            |       |           |                        |                           |                              |
| 18 |                  |       |              |            |       |           |                        |                           |                              |
| 19 |                  |       |              |            |       |           |                        |                           |                              |
| 20 |                  |       |              |            |       |           |                        |                           |                              |
| 21 | Sun <i>at</i>    | Maybe | Quantitative | Zhejiang,  | Urban | Community | To ascertain the key   | 38.7 % community          | The influencing factors      |
| 22 | <i>all.</i> ,    | 2012  | study        | Guangdong, |       | Health    | factors that influence | health workers intended   | that result in CHS worker    |
| 23 | 2013             |       |              | Guizhou,   |       | Centre    | the CHS worker         | to quit.                  | turnover intention are       |
| 24 |                  |       |              | Hebei, and |       |           | turnover intention to  | CHS workers were less     | socio-demographic            |
| 25 |                  |       |              | Hubei      |       |           | increase their work    | satisfied with the        | factors such as age, post    |
| 26 |                  |       |              |            |       |           | satisfaction and       | balance between           | of duty, professional title, |
| 27 |                  |       |              |            |       |           | stability.             | payment and work          | and working seniority,       |
| 28 |                  |       |              |            |       |           |                        | quantity, promotion       | and other work-related       |
| 29 |                  |       |              |            |       |           |                        | opportunity, and          | factors such as pay          |
| 30 |                  |       |              |            |       |           |                        | working conditions.       | packets, learning and        |
| 31 |                  |       |              |            |       |           |                        |                           | training opportunities,      |
| 32 |                  |       |              |            |       |           |                        |                           | promotion and personal       |
| 33 |                  |       |              |            |       |           |                        |                           | development space, and       |
| 34 |                  |       |              |            |       |           |                        |                           | working stress.              |
| 35 |                  |       |              |            |       |           |                        |                           |                              |
| 36 |                  |       |              |            |       |           |                        |                           |                              |
| 37 |                  |       |              |            |       |           |                        |                           |                              |
| 38 |                  |       |              |            |       |           |                        |                           |                              |
| 39 |                  |       |              |            |       |           |                        |                           |                              |
| 40 |                  |       |              |            |       |           |                        |                           |                              |
| 41 |                  |       |              |            |       |           |                        |                           |                              |
| 42 |                  |       |              |            |       |           |                        |                           |                              |
| 43 |                  |       |              |            |       |           |                        |                           |                              |
| 44 |                  |       |              |            |       |           |                        |                           |                              |
| 45 |                  |       |              |            |       |           |                        |                           |                              |
| 46 |                  |       |              |            |       |           |                        |                           |                              |

1  
2  
3  
4  
5 Ding 2011.3- Quantitative Hubei, Jiangxi Rural Township To improve the early Village doctors prioritize Factors to consider in  
6 *at all.*, 6 study Hubei, Jiangxi Rural Township Health detection of medical services but future activities to  
7 2013 Centre; epidemics in rural they do their best to improve the quality and  
8 Village China by integrating manage their time to extent of public health  
9 Clinic syndromic services. The willingness services provided by  
10 surveillance with the of township health village doctors include  
11 existing case report centre directors and actual and potential  
12 system. village doctors to income (i.e. medical  
13 provide public health services, social pension  
14 since the introduction of and other government  
15 the package and a support), the relationship  
16 minimum subsidy, but between village clinics  
17 village doctors do not and township health  
18 find the subsidy to be centres and the amount of  
19 sufficient remuneration public health subsidy.  
20 for their efforts.  
21  
22  
23  
24  
25  
26  
27  
28  
29  
30  
31  
32  
33  
34  
35  
36  
37  
38  
39  
40  
41  
42  
43  
44  
45  
46

|    |               |         |              |               |       |           |                       |                           |                             |
|----|---------------|---------|--------------|---------------|-------|-----------|-----------------------|---------------------------|-----------------------------|
| 1  |               |         |              |               |       |           |                       |                           |                             |
| 2  |               |         |              |               |       |           |                       |                           |                             |
| 3  |               |         |              |               |       |           |                       |                           |                             |
| 4  |               |         |              |               |       |           |                       |                           |                             |
| 5  | Li <i>at</i>  | 2009.12 | Quantitative | Beijing,      | Rural | Township  | To analyze the        | Rural health              | Rural doctors wanted to     |
| 6  | <i>all.</i> , | -2010.1 | study        | Jiangsu,      |       | Health    | educational status    | professionals in China    | extend the training time,   |
| 7  | 2013          | 2       |              | Zhejiang,     |       | Centre;   | and future training   | who have relatively low   | preferred to                |
| 8  |               |         |              | Hainan ,Guang |       | Village   | needs of China's      | healthcare education      | practice-focused training   |
| 9  |               |         |              | xi , Shanxi,  |       | Clinic    | rural doctors and     | should be focused on.     | (on-site guidance from      |
| 10 |               |         |              | Jiangxi,      |       |           | provide a basis to    | Rural doctors the         | senior doctors, clinical    |
| 11 |               |         |              | Guizhou,      |       |           | improve their future  | training status and needs | further education), and     |
| 12 |               |         |              | Yunnan,       |       |           | training.             | of China's rural doctors  | had greater desire for      |
| 13 |               |         |              | Gansu         |       |           |                       | are still disjointed in   | clinical skills, preventive |
| 14 |               |         |              |               |       |           |                       | terms of the training     | healthcare and medication   |
| 15 |               |         |              |               |       |           |                       | time, training method     | knowledge education.        |
| 16 |               |         |              |               |       |           |                       | and training content.     |                             |
| 17 |               |         |              |               |       |           |                       |                           |                             |
| 18 |               |         |              |               |       |           |                       |                           |                             |
| 19 |               |         |              |               |       |           |                       |                           |                             |
| 20 | Shi <i>at</i> | 2011    | Quantitative | 5 provinces   | Both  | Township  | To provide a          | Low job satisfaction      | Lower income and higher     |
| 21 | <i>all.</i> , |         | study        | representing  |       | Health    | snapshot of the       | PCW are least satisfied   | workload are the two        |
| 22 | 2014          |         |              | Eastern,      |       | Centre;   | current state of      | with their income level   | major contributing factors  |
| 23 |               |         |              | Central, and  |       | Village   | primary care          | (only 8.6% are either     | toward job dissatisfaction. |
| 24 |               |         |              | Western China |       | Clinic;   | workforce (PCW)       | satisfied or very         |                             |
| 25 |               |         |              |               |       | Community | serving China's       | satisfied), benefits      |                             |
| 26 |               |         |              |               |       | Health    | grassroots            | (12.8%), and              |                             |
| 27 |               |         |              |               |       | Centre/   | communities and       | professional              |                             |
| 28 |               |         |              |               |       | Station   | examine the factors   | development (19.5%).      |                             |
| 29 |               |         |              |               |       |           | associated with their |                           |                             |
| 30 |               |         |              |               |       |           | job satisfaction.     |                           |                             |
| 31 |               |         |              |               |       |           |                       |                           |                             |
| 32 |               |         |              |               |       |           |                       |                           |                             |
| 33 |               |         |              |               |       |           |                       |                           |                             |
| 34 |               |         |              |               |       |           |                       |                           |                             |
| 35 |               |         |              |               |       |           |                       |                           |                             |
| 36 |               |         |              |               |       |           |                       |                           |                             |
| 37 |               |         |              |               |       |           |                       |                           |                             |
| 38 |               |         |              |               |       |           |                       |                           |                             |
| 39 |               |         |              |               |       |           |                       |                           |                             |
| 40 |               |         |              |               |       |           |                       |                           |                             |
| 41 |               |         |              |               |       |           |                       |                           |                             |
| 42 |               |         |              |               |       |           |                       |                           |                             |
| 43 |               |         |              |               |       |           |                       |                           |                             |
| 44 |               |         |              |               |       |           |                       |                           |                             |
| 45 |               |         |              |               |       |           |                       |                           |                             |
| 46 |               |         |              |               |       |           |                       |                           |                             |

1  
2  
3  
4  
5  
6  
7  
8  
9  
10  
11  
12  
13  
14  
15  
16  
17  
18  
19  
20  
21  
22  
23  
24  
25  
26  
27  
28  
29  
30  
31  
32  
33  
34  
35  
36  
37  
38  
39  
40  
41  
42  
43  
44  
45  
46

|                           |                  |                    |          |       |                         |                                                                                                                                                                                                  |                                                                                                                                                    |                                                                                                                                                                                                                                                                                                                       |
|---------------------------|------------------|--------------------|----------|-------|-------------------------|--------------------------------------------------------------------------------------------------------------------------------------------------------------------------------------------------|----------------------------------------------------------------------------------------------------------------------------------------------------|-----------------------------------------------------------------------------------------------------------------------------------------------------------------------------------------------------------------------------------------------------------------------------------------------------------------------|
| Ge <i>et al.</i> , 2011   | 2009.12 -2010.2  | Quantitative study | Liaoning | Urban | Community Health Centre | To clarify the level of job satisfaction of Chinese community health workers between a metropolitan (Shenyang) and a small city (Benxi) in Liaoning province and explore its associated factors. | A moderate level of job satisfactions. Community health workers in a metropolitan had lower job satisfaction as compared to those in a small city. | Three significant predictors of intrinsic and extrinsic job satisfactions were the two dimensions (social support and decision latitude) of stress and cynicism of burnout.                                                                                                                                           |
| Zhao <i>et al.</i> , 2011 | 2008.12 - 2009.2 | Qualitative study  | Beijing  | Urban | Community Health Centre | To understand the advancements in and barriers to the implementation of measures to improve basic public health services in an urban Chinese community.                                          | The number of practitioners and their low levels of skill were insufficient to provide adequate services for community residents.                  | Due to the broad scope of basic public health services and limited financial incentives, providers felt that they were under great stress and often complained that community members for whom they were responsible did not trust them as these clinicians had lower levels of knowledge and skill than specialists. |

|    |                  |      |              |          |       |          |                        |                           |                            |
|----|------------------|------|--------------|----------|-------|----------|------------------------|---------------------------|----------------------------|
| 1  |                  |      |              |          |       |          |                        |                           |                            |
| 2  |                  |      |              |          |       |          |                        |                           |                            |
| 3  |                  |      |              |          |       |          |                        |                           |                            |
| 4  |                  |      |              |          |       |          |                        |                           |                            |
| 5  | Liu <i>at</i>    | 2007 | Quantitative | Anhui,   | Rural | Township | To measure job         | Moderate job              | Township health centers    |
| 6  | <i>all.</i> ,    |      | study        | Xinjiang |       | Health   | satisfaction level of  | satisfactions in poor     | employees are more         |
| 7  | 2010             |      |              |          |       | Centre   | THC employees in       | areas. Job satisfaction   | satisfied with the work    |
| 8  |                  |      |              |          |       |          | poor rural China and   | scores reflecting job     | significance and           |
| 9  |                  |      |              |          |       |          | to identify relevant   | significance, job         | cooperation with           |
| 10 |                  |      |              |          |       |          | features in order to   | competency and team       | colleagues, while less     |
| 11 |                  |      |              |          |       |          | provide policy advice  | work were highest, while  | satisfied with work        |
| 12 |                  |      |              |          |       |          | on human resource      | work conditions and       | conditions, reward and     |
| 13 |                  |      |              |          |       |          | development of         | atmosphere and job        | promotion opportunities.   |
| 14 |                  |      |              |          |       |          | health service         | reward were lowest.       |                            |
| 15 |                  |      |              |          |       |          | institutions in poor   |                           |                            |
| 16 |                  |      |              |          |       |          | regions.               |                           |                            |
| 17 |                  |      |              |          |       |          |                        |                           |                            |
| 18 |                  |      |              |          |       |          |                        |                           |                            |
| 19 |                  |      |              |          |       |          |                        |                           |                            |
| 20 |                  |      |              |          |       |          |                        |                           |                            |
| 21 | Zhou             | 2013 | Qualitative  | Jiangxi  | Rural | Township | To explore the         | The contract service      | Most health providers      |
| 22 | <i>at all.</i> , |      | Study        |          |       | Health   | perspectives of        | actually promoted the     | complained about the       |
| 23 | 2015             |      |              |          |       | Centre;  | health providers on    | supply side to provide    | heavy workload,            |
| 24 | Feb              |      |              |          |       | Village  | the contract service   | more public health        | insufficient remuneration, |
| 25 |                  |      |              |          |       | Clinic   | policy, and            | services to the villagers | staff shortage, lack of    |
| 26 |                  |      |              |          |       |          | investigate the        | and contracted patients   | official identity and      |
| 27 |                  |      |              |          |       |          | demand side's          | felt satisfied with the   | ineffective performance    |
| 28 |                  |      |              |          |       |          | attitude toward the    | doctor-patient            | appraisal, in addition to  |
| 29 |                  |      |              |          |       |          | public health services | relationship.             | contempt from some         |
| 30 |                  |      |              |          |       |          | delivered under the    |                           | villagers and supervisors  |
| 31 |                  |      |              |          |       |          | contract policy.       |                           | after the implementation   |
| 32 |                  |      |              |          |       |          |                        |                           | of the contract service.   |
| 33 |                  |      |              |          |       |          |                        |                           |                            |
| 34 |                  |      |              |          |       |          |                        |                           |                            |
| 35 |                  |      |              |          |       |          |                        |                           |                            |
| 36 |                  |      |              |          |       |          |                        |                           |                            |
| 37 |                  |      |              |          |       |          |                        |                           |                            |
| 38 |                  |      |              |          |       |          |                        |                           |                            |
| 39 |                  |      |              |          |       |          |                        |                           |                            |
| 40 |                  |      |              |          |       |          |                        |                           |                            |
| 41 |                  |      |              |          |       |          |                        |                           |                            |
| 42 |                  |      |              |          |       |          |                        |                           |                            |
| 43 |                  |      |              |          |       |          |                        |                           |                            |
| 44 |                  |      |              |          |       |          |                        |                           |                            |
| 45 |                  |      |              |          |       |          |                        |                           |                            |
| 46 |                  |      |              |          |       |          |                        |                           |                            |

1  
2  
3  
4  
5  
6  
7  
8  
9  
10  
11  
12  
13  
14  
15  
16  
17  
18  
19  
20  
21  
22  
23  
24  
25  
26  
27  
28  
29  
30  
31  
32  
33  
34  
35  
36  
37  
38  
39  
40  
41  
42  
43  
44  
45  
46

|                                  |               |                       |         |       |                                                    |                                                                                                                                        |                                                                                                                                                                                                                                                      |                                                                                                                                                                                                                                                                                                                                                              |
|----------------------------------|---------------|-----------------------|---------|-------|----------------------------------------------------|----------------------------------------------------------------------------------------------------------------------------------------|------------------------------------------------------------------------------------------------------------------------------------------------------------------------------------------------------------------------------------------------------|--------------------------------------------------------------------------------------------------------------------------------------------------------------------------------------------------------------------------------------------------------------------------------------------------------------------------------------------------------------|
| Chen<br><i>at all.</i> ,<br>2015 | 2012.5-<br>7  | Mixed<br>method study | Jiangsu | Rural | Township<br>Health<br>Centre;<br>Village<br>Clinic | To reveal the<br>challenges of village<br>doctors' survival and<br>training in<br>economically<br>developed areas in<br>eastern China. | The main challenges in<br>Changzhou include an<br>insufficient amount of<br>village doctors,<br>difficulties in obtaining<br>professional<br>qualification for village<br>doctors, low salaries and<br>benefits, and difficulties<br>in recruitment. | The gap between<br>expected and actual<br>income is the primary<br>factor affecting the<br>attractiveness of a career<br>as a village doctor.<br>Changes to training have<br>influenced the stability of<br>village doctor teams.<br>Declining attachment of<br>young people to their<br>hometown village has<br>contributed to recruitment<br>difficulties. |
| Wang<br><i>at all.</i> ,<br>2013 | 2009.9-<br>11 | Quantitative<br>study | Beijing | Rural | Village<br>Clinic                                  | To explore the<br>reasons for the poor<br>recruitment and to<br>propose possible<br>strategies to improve<br>the situation.            | Rural doctors were<br>generally older than<br>average and considered<br>the training strategy to<br>be inadequate in in<br>China.                                                                                                                    | In general, the initiatives<br>identified by rural doctors<br>as being of most value in<br>the recruitment of doctors<br>were those targeting<br>retirement pension and<br>income.                                                                                                                                                                           |

|    |                  |        |              |           |       |           |                        |                           |                             |
|----|------------------|--------|--------------|-----------|-------|-----------|------------------------|---------------------------|-----------------------------|
| 1  |                  |        |              |           |       |           |                        |                           |                             |
| 2  |                  |        |              |           |       |           |                        |                           |                             |
| 3  |                  |        |              |           |       |           |                        |                           |                             |
| 4  |                  |        |              |           |       |           |                        |                           |                             |
| 5  | Li <i>at</i>     | 2014.4 | Mixed        | Shandong, | Rural | Village   | To describe village    | Low job satisfaction.     | From interviews, most       |
| 6  | <i>all.</i> ,    |        | method study | Guangxi,  |       | Clinic    | doctors' job           | Village doctors who       | workers believed that age,  |
| 7  | 2017             |        |              | Shaanxi   |       |           | satisfaction under the | earned the top level of   | income, and integrated      |
| 8  |                  |        |              |           |       |           | context of health      | monthly income felt       | management had a            |
| 9  |                  |        |              |           |       |           | sector reform and      | more satisfied, while on  | positive influence on the   |
| 10 |                  |        |              |           |       |           | investigate the        | the county level, those   | job satisfaction, while     |
| 11 |                  |        |              |           |       |           | associated factors.    | who lived in counties     | pension plan and basic      |
| 12 |                  |        |              |           |       |           |                        | with the highest GDP      | public health care policies |
| 13 |                  |        |              |           |       |           |                        | felt less satisfied.      | exhibited negative effects. |
| 14 |                  |        |              |           |       |           |                        |                           | Also, the increasing in     |
| 15 |                  |        |              |           |       |           |                        |                           | availability of healthcare  |
| 16 |                  |        |              |           |       |           |                        |                           | and health resources        |
| 17 |                  |        |              |           |       |           |                        |                           | along with local economic   |
| 18 |                  |        |              |           |       |           |                        |                           | development had negative    |
| 19 |                  |        |              |           |       |           |                        |                           | effects on village doctors' |
| 20 |                  |        |              |           |       |           |                        |                           | job satisfaction.           |
| 21 |                  |        |              |           |       |           |                        |                           |                             |
| 22 |                  |        |              |           |       |           |                        |                           |                             |
| 23 |                  |        |              |           |       |           |                        |                           |                             |
| 24 |                  |        |              |           |       |           |                        |                           |                             |
| 25 | Zhang            | 2013   | Quantitative | Shanghai, | Urban | Community | To examine the         | The effect of P-O fit on  | P-O fit was directly        |
| 26 | <i>at all.</i> , |        | study        | Shaanxi,  |       | Health    | mediation effect of    | turnover intention was    | related to job satisfaction |
| 27 | 2017             |        |              | Shandong, |       | Centre    | job satisfaction on    | partially mediated        | and inversely related to    |
| 28 |                  |        |              | Anhui     |       |           | the relationship       | through job satisfaction. | turnover intention.         |
| 29 |                  |        |              |           |       |           | between                |                           |                             |
| 30 |                  |        |              |           |       |           | person-organization    |                           |                             |
| 31 |                  |        |              |           |       |           | fit (P-O fit) and      |                           |                             |
| 32 |                  |        |              |           |       |           | turnover intention     |                           |                             |
| 33 |                  |        |              |           |       |           | based on data from     |                           |                             |
| 34 |                  |        |              |           |       |           | China.                 |                           |                             |
| 35 |                  |        |              |           |       |           |                        |                           |                             |
| 36 |                  |        |              |           |       |           |                        |                           |                             |
| 37 |                  |        |              |           |       |           |                        |                           |                             |
| 38 |                  |        |              |           |       |           |                        |                           |                             |
| 39 |                  |        |              |           |       |           |                        |                           |                             |
| 40 |                  |        |              |           |       |           |                        |                           |                             |
| 41 |                  |        |              |           |       |           |                        |                           |                             |
| 42 |                  |        |              |           |       |           |                        |                           |                             |
| 43 |                  |        |              |           |       |           |                        |                           |                             |
| 44 |                  |        |              |           |       |           |                        |                           |                             |
| 45 |                  |        |              |           |       |           |                        |                           |                             |
| 46 |                  |        |              |           |       |           |                        |                           |                             |



1  
2  
3  
4  
5  
6  
7  
8  
9  
10  
11  
12  
13  
14  
15  
16  
17  
18  
19  
20  
21  
22  
23  
24  
25  
26  
27  
28  
29  
30  
31  
32  
33  
34  
35  
36  
37  
38  
39  
40  
41  
42  
43  
44  
45  
46

|                            |                 |                    |              |       |                                                 |                                                                                                                                                            |                                                                                                                                                                                                                                                 |                                                                                                                                                                                                                                         |
|----------------------------|-----------------|--------------------|--------------|-------|-------------------------------------------------|------------------------------------------------------------------------------------------------------------------------------------------------------------|-------------------------------------------------------------------------------------------------------------------------------------------------------------------------------------------------------------------------------------------------|-----------------------------------------------------------------------------------------------------------------------------------------------------------------------------------------------------------------------------------------|
| Li <i>at all.</i> , 2014   | 2013.3.1 -10.31 | Quantitative study | Heilongjiang | Urban | Community Health Centre                         | To examine levels of work stress and motivation and their contribution to job satisfaction among community health workers in Heilongjiang Province, China. | Levels of overall motivation perception and scores on the career development, responsibility and recognition motivation subscales were higher in satisfied respondents relative to dissatisfied respondents.                                    | The main determinants of job satisfaction were occupation; age; title; income; the career development, and wages and benefits subscales of work stress; and the recognition, responsibility and financial subscales of work motivation. |
| Meng <i>at all.</i> , 2009 | 2006            | Qualitative Study  | 10 provinces | Both  | Township Health Centre; Community Health Centre | To analyze the mobility of health workers in township and community health centres.                                                                        | Increased rate of workers leaving township and community health centres between 2000 and 2005, with the majority of the mobile health workers moving to higher-level health facilities; very few moving to other rural township health centres. | The main reasons for leaving were low salaries, limited opportunities for professional development and poor living conditions.                                                                                                          |

|    |          |       |              |           |       |          |                         |                           |                            |
|----|----------|-------|--------------|-----------|-------|----------|-------------------------|---------------------------|----------------------------|
| 1  |          |       |              |           |       |          |                         |                           |                            |
| 2  |          |       |              |           |       |          |                         |                           |                            |
| 3  |          |       |              |           |       |          |                         |                           |                            |
| 4  |          |       |              |           |       |          |                         |                           |                            |
| 5  | Wang     | 2013  | Quantitative | Shandong, | Rural | Township | To investigate the      | The minority of           | Low job satisfaction was   |
| 6  | at all., |       | study        | Anhui,    |       | Health   | association between     | health-care staff belong  | associated with specialty, |
| 7  | 2017     |       |              | Shaanxi   |       | Centre   | the latent clusters     | to the “satisfied class”. | training opportunity, and  |
| 8  |          |       |              |           |       |          | and health-care         | Three among four          | income inequality.         |
| 9  |          |       |              |           |       |          | staff’s personal and    | subgroups are not         |                            |
| 10 |          |       |              |           |       |          | professional features.  | satisfied with income,    |                            |
| 11 |          |       |              |           |       |          |                         | benefit, training, and    |                            |
| 12 |          |       |              |           |       |          |                         | career development.       |                            |
| 13 |          |       |              |           |       |          |                         |                           |                            |
| 14 |          |       |              |           |       |          |                         |                           |                            |
| 15 |          |       |              |           |       |          |                         |                           |                            |
| 16 | Chen     | After | Qualitative  | Guangxi   | Rural | Township | To understand the       | Increasing the incomes    | The main concerns related  |
| 17 | at all., | 2009  | study        |           |       | Health   | level of job            | and fringe benefits of    | to job satisfaction        |
| 18 | 2017     |       |              |           |       | Centre   | satisfaction as felt by | healthcare workers,       | included working           |
| 19 |          |       |              |           |       |          | primary health care     | improving their work      | conditions, financial      |
| 20 |          |       |              |           |       |          | providers.              | conditions, and           | rewards, and the doctor’s  |
| 21 |          |       |              |           |       |          |                         | providing training and    | relationships with         |
| 22 |          |       |              |           |       |          |                         | continuing education      | patients.                  |
| 23 |          |       |              |           |       |          |                         | opportunities would help  |                            |
| 24 |          |       |              |           |       |          |                         | rural clinics retain      |                            |
| 25 |          |       |              |           |       |          |                         | doctors and eliminate the |                            |
| 26 |          |       |              |           |       |          |                         | current unsatisfactory    |                            |
| 27 |          |       |              |           |       |          |                         | conditions.               |                            |
| 28 |          |       |              |           |       |          |                         |                           |                            |
| 29 |          |       |              |           |       |          |                         |                           |                            |
| 30 |          |       |              |           |       |          |                         |                           |                            |
| 31 |          |       |              |           |       |          |                         |                           |                            |
| 32 |          |       |              |           |       |          |                         |                           |                            |
| 33 |          |       |              |           |       |          |                         |                           |                            |
| 34 |          |       |              |           |       |          |                         |                           |                            |
| 35 |          |       |              |           |       |          |                         |                           |                            |
| 36 |          |       |              |           |       |          |                         |                           |                            |
| 37 |          |       |              |           |       |          |                         |                           |                            |
| 38 |          |       |              |           |       |          |                         |                           |                            |
| 39 |          |       |              |           |       |          |                         |                           |                            |
| 40 |          |       |              |           |       |          |                         |                           |                            |
| 41 |          |       |              |           |       |          |                         |                           |                            |
| 42 |          |       |              |           |       |          |                         |                           |                            |
| 43 |          |       |              |           |       |          |                         |                           |                            |
| 44 |          |       |              |           |       |          |                         |                           |                            |
| 45 |          |       |              |           |       |          |                         |                           |                            |
| 46 |          |       |              |           |       |          |                         |                           |                            |

1  
2  
3  
4  
5  
6  
7  
8  
9  
10  
11  
12  
13  
14  
15  
16  
17  
18  
19  
20  
21  
22  
23  
24  
25  
26  
27  
28  
29  
30  
31  
32  
33  
34  
35  
36  
37  
38  
39  
40  
41  
42  
43  
44  
45  
46

|                        |      |                       |           |      |                                                                                                  |                                                                                                                                                                                                                                                                                         |                                                                                                                                                                                                                                                                                              |                                                                                                                                                                                                                                                                                                                             |
|------------------------|------|-----------------------|-----------|------|--------------------------------------------------------------------------------------------------|-----------------------------------------------------------------------------------------------------------------------------------------------------------------------------------------------------------------------------------------------------------------------------------------|----------------------------------------------------------------------------------------------------------------------------------------------------------------------------------------------------------------------------------------------------------------------------------------------|-----------------------------------------------------------------------------------------------------------------------------------------------------------------------------------------------------------------------------------------------------------------------------------------------------------------------------|
| Lu at<br>all.,<br>2016 | 2013 | Quantitative<br>study | Guangdong | Both | Township<br>Health<br>Centre;<br>Village<br>Clinic;<br>Community<br>Health<br>Centre/<br>Station | To explore job<br>satisfaction among<br>healthcare staff in<br>Guangdong<br>following the health<br>system reforms in<br>2009, and to<br>investigate the<br>association between<br>job satisfaction and<br>work stress, work-<br>family conflict and<br>doctor-patient<br>relationship. | The overall job<br>satisfaction exceeded<br>slightly dissatisfied and<br>approached slightly<br>satisfied. Measures to<br>enhance job satisfaction<br>include the reduction of<br>workload, increase of<br>welfare, maintaining<br>moderate stress and<br>balancing work-family<br>conflict. | The sociodemographic<br>variables including<br>occupation, educational<br>background, professional<br>status, years of service,<br>annual income and night<br>shift, work stress, work-<br>family conflict and<br>doctor-patient<br>relationship frequency<br>significantly influenced<br>the level of job<br>satisfaction. |
|------------------------|------|-----------------------|-----------|------|--------------------------------------------------------------------------------------------------|-----------------------------------------------------------------------------------------------------------------------------------------------------------------------------------------------------------------------------------------------------------------------------------------|----------------------------------------------------------------------------------------------------------------------------------------------------------------------------------------------------------------------------------------------------------------------------------------------|-----------------------------------------------------------------------------------------------------------------------------------------------------------------------------------------------------------------------------------------------------------------------------------------------------------------------------|

For peer review only

|    |          |      |              |            |       |           |                       |                            |                            |
|----|----------|------|--------------|------------|-------|-----------|-----------------------|----------------------------|----------------------------|
| 1  |          |      |              |            |       |           |                       |                            |                            |
| 2  |          |      |              |            |       |           |                       |                            |                            |
| 3  |          |      |              |            |       |           |                       |                            |                            |
| 4  |          |      |              |            |       |           |                       |                            |                            |
| 5  | Song     | 2011 | Quantitative | Jilin,     | Both  | Township  | To find out which     | Policymakers need to       | Though income was          |
| 6  | at all., |      | study        | Shandong,  |       | Health    | job attributes affect | improve primary care       | important, Chinese         |
| 7  | 2015     |      |              | Anhui,     |       | Centre;   | Chinese primary care  | providers' income,         | primary care providers     |
| 8  |          |      |              | Chongqing, |       | Community | providers' choice of  | benefits and working       | also had strong            |
| 9  |          |      |              | Shaanxi    |       | Health    | job and whether       | conditions to fulfil their | preferences for sufficient |
| 10 |          |      |              |            |       | Centre    | there are any         | basic needs, invest in     | welfare benefits,          |
| 11 |          |      |              |            |       |           | differences in these  | infrastructure and         | sufficient essential       |
| 12 |          |      |              |            |       |           | job preferences       | strengthen training        | equipment and respect      |
| 13 |          |      |              |            |       |           | between doctors and   | programmes in order to     | from the community.        |
| 14 |          |      |              |            |       |           | nurses.               | raise the community's      |                            |
| 15 |          |      |              |            |       |           |                       | confidence in the          |                            |
| 16 |          |      |              |            |       |           |                       | services.                  |                            |
| 17 |          |      |              |            |       |           |                       |                            |                            |
| 18 |          |      |              |            |       |           |                       |                            |                            |
| 19 |          |      |              |            |       |           |                       |                            |                            |
| 20 |          |      |              |            |       |           |                       |                            |                            |
| 21 | Mo at    | 2014 | Quantitative | Guangxi    | Rural | Township  | To explore the        | A decentralized            | Mismatch between           |
| 22 | all.,    |      | study        |            |       | Health    | current health        | degree-linked training     | current health training    |
| 23 | 2017     |      |              |            |       | Centre    | training status of    | program in which           | initiatives and desired    |
| 24 |          |      |              |            |       |           | nurses working in     | medical universities and   | programs in terms of       |
| 25 |          |      |              |            |       |           | rural Chinese         | city hospitals collaborate | training setting, content, |
| 26 |          |      |              |            |       |           | township health       | would be an appropriate    | and delivery mode          |
| 27 |          |      |              |            |       |           | centers and to        | mode of delivery.          |                            |
| 28 |          |      |              |            |       |           | ascertain their       |                            |                            |
| 29 |          |      |              |            |       |           | perceived needs.      |                            |                            |
| 30 |          |      |              |            |       |           |                       |                            |                            |
| 31 |          |      |              |            |       |           |                       |                            |                            |
| 32 |          |      |              |            |       |           |                       |                            |                            |
| 33 |          |      |              |            |       |           |                       |                            |                            |
| 34 |          |      |              |            |       |           |                       |                            |                            |
| 35 |          |      |              |            |       |           |                       |                            |                            |
| 36 |          |      |              |            |       |           |                       |                            |                            |
| 37 |          |      |              |            |       |           |                       |                            |                            |
| 38 |          |      |              |            |       |           |                       |                            |                            |
| 39 |          |      |              |            |       |           |                       |                            |                            |
| 40 |          |      |              |            |       |           |                       |                            |                            |
| 41 |          |      |              |            |       |           |                       |                            |                            |
| 42 |          |      |              |            |       |           |                       |                            |                            |
| 43 |          |      |              |            |       |           |                       |                            |                            |
| 44 |          |      |              |            |       |           |                       |                            |                            |
| 45 |          |      |              |            |       |           |                       |                            |                            |
| 46 |          |      |              |            |       |           |                       |                            |                            |

1  
2  
3  
4  
5  
6  
7  
8  
9  
10  
11  
12  
13  
14  
15  
16  
17  
18  
19  
20  
21  
22  
23  
24  
25  
26  
27  
28  
29  
30  
31  
32  
33  
34  
35  
36  
37  
38  
39  
40  
41  
42  
43  
44  
45  
46

|                     |      |                    |                                      |       |                                  |                                                                                                                             |                                                                                                                                                         |                                                                                                                                                                                                                                     |
|---------------------|------|--------------------|--------------------------------------|-------|----------------------------------|-----------------------------------------------------------------------------------------------------------------------------|---------------------------------------------------------------------------------------------------------------------------------------------------------|-------------------------------------------------------------------------------------------------------------------------------------------------------------------------------------------------------------------------------------|
| Zhang at all., 2017 | 2013 | Qualitative Study  | Shandong                             | Urban | Community Health Centre/ Station | To analyze how health reform of CHS led to changing job features for primary health providers.                              | The new model of primary health care significantly affected the nature of primary health work and triggered a range of PHC providers' coping processes. | Health workers perceived their job as less intensive than hospital medical work but often more trivial, characterized by heavy workload, blurred job description, unsatisfactory income, and a lack of professional development.    |
| Zhang at all., 2017 | 2014 | Quantitative study | Zhejiang, Jiangxi, Shaanxi, Xinjiang | Urban | Community Health Centre          | To investigate the perceptions of primary care workers about the impacts of the national essential medicines policy (NEMP). | The NEMP has significant impacts (as perceived by the health workers) on health services delivery in primary care settings.                             | The impacts of the NEMP vary by region, professional practice and the income level of health workers. It is important to maintain support from physicians through income subsidies (to compensate for potential loss) and training. |

|    |          |      |              |           |       |         |                         |                          |                             |
|----|----------|------|--------------|-----------|-------|---------|-------------------------|--------------------------|-----------------------------|
| 1  |          |      |              |           |       |         |                         |                          |                             |
| 2  |          |      |              |           |       |         |                         |                          |                             |
| 3  |          |      |              |           |       |         |                         |                          |                             |
| 4  |          |      |              |           |       |         |                         |                          |                             |
| 5  | Feng     | 2014 | Quantitative | Qinghai,  | Rural | Village | To examine the          | Low satisfaction with    | Social insurance, essential |
| 6  | at all., |      | study        | Inner     |       | Clinic  | satisfaction of village | the TVHSIM.              | medical knowledge, year     |
| 7  | 2017     |      |              | Mongolia, |       |         | doctors with the        | A well-rounded social    | of practice significantly   |
| 8  |          |      |              | Xinjiang  |       |         | Township and            | insurance model for      | influenced satisfaction of  |
| 9  |          |      |              |           |       |         | Village Health          | village doctors is       | village doctors on human    |
| 10 |          |      |              |           |       |         | Services Integration    | urgently needed and      | resources management,       |
| 11 |          |      |              |           |       |         | Management              | enhancing essential      | drug and medical device     |
| 12 |          |      |              |           |       |         | (TVHSIM).               | medical training should  | management, and             |
| 13 |          |      |              |           |       |         |                         | be carefully considered. | financing management.       |
| 14 |          |      |              |           |       |         |                         |                          |                             |
| 15 |          |      |              |           |       |         |                         |                          |                             |
| 16 |          |      |              |           |       |         |                         |                          |                             |
| 17 |          |      |              |           |       |         |                         |                          |                             |
| 18 |          |      |              |           |       |         |                         |                          |                             |
| 19 | Li at    | 2014 | Quantitative | Shandong, | Rural | Village | To identify factors     | There is considerable    | Increasing public health    |
| 20 | all.,    |      | study        | Guangxi,  |       | Clinic  | associated with         | room for improvement     | care subsidies received by  |
| 21 | 2016     |      |              | Shaanxi   |       |         | village doctors' basic  | regarding the factors    | individual village doctors, |
| 22 |          |      |              |           |       |         | public health services  | associated with village  | availability and            |
| 23 |          |      |              |           |       |         | provision and to        | doctors' basic public    | attendance of training      |
| 24 |          |      |              |           |       |         | formulate targeted      | health services          | opportunities, and          |
| 25 |          |      |              |           |       |         | interventions in rural  | provision.               | integrated management       |
| 26 |          |      |              |           |       |         | China.                  |                          | and NCMS contracting of     |
| 27 |          |      |              |           |       |         |                         |                          | village clinics are         |
| 28 |          |      |              |           |       |         |                         |                          | important factors in        |
| 29 |          |      |              |           |       |         |                         |                          | increasing basic public     |
| 30 |          |      |              |           |       |         |                         |                          | health services revision in |
| 31 |          |      |              |           |       |         |                         |                          | rural areas.                |
| 32 |          |      |              |           |       |         |                         |                          |                             |
| 33 |          |      |              |           |       |         |                         |                          |                             |
| 34 |          |      |              |           |       |         |                         |                          |                             |
| 35 |          |      |              |           |       |         |                         |                          |                             |
| 36 |          |      |              |           |       |         |                         |                          |                             |
| 37 |          |      |              |           |       |         |                         |                          |                             |
| 38 |          |      |              |           |       |         |                         |                          |                             |
| 39 |          |      |              |           |       |         |                         |                          |                             |
| 40 |          |      |              |           |       |         |                         |                          |                             |
| 41 |          |      |              |           |       |         |                         |                          |                             |
| 42 |          |      |              |           |       |         |                         |                          |                             |
| 43 |          |      |              |           |       |         |                         |                          |                             |
| 44 |          |      |              |           |       |         |                         |                          |                             |
| 45 |          |      |              |           |       |         |                         |                          |                             |
| 46 |          |      |              |           |       |         |                         |                          |                             |

1  
2  
3  
4  
5  
6  
7  
8  
9  
10  
11  
12  
13  
14  
15  
16  
17  
18  
19  
20  
21  
22  
23  
24  
25  
26  
27  
28  
29  
30  
31  
32  
33  
34  
35  
36  
37  
38  
39  
40  
41  
42  
43  
44  
45  
46

|                    |      |                    |         |       |                            |                                                                                                                                            |                                                                                                                                            |                                                                                                                                                                                                                                             |
|--------------------|------|--------------------|---------|-------|----------------------------|--------------------------------------------------------------------------------------------------------------------------------------------|--------------------------------------------------------------------------------------------------------------------------------------------|---------------------------------------------------------------------------------------------------------------------------------------------------------------------------------------------------------------------------------------------|
| Song at all., 2016 | 2011 | Quantitative study | Ningxia | Both  | Primary healthcare centers | To examine current understanding and opinions of China’s National Essential Medicine System (NEMS) of primary care providers and patients. | High level of satisfaction towards NEMS among primary care providers, which is a reflection of the improvements in the health care system. | Overall there was a link between knowledge about NEMS and satisfaction with the program: the providers with greater knowledge of NEMS, reported higher satisfaction.                                                                        |
| Feng at all., 2025 | 2012 | Mixed method study | Jiangsu | Rural | Village Clinic             | To identify specific factors of and potential solutions to the shortage in village doctors.                                                | The shortage in village doctors presents a major obstacle toward the realization of China’s policy of public health service equalization.  | Many factors associated with the shortage of village doctors were payment related including low salaries and bonuses, heavy workload, few opportunities for continuing education, unattractive pension plans and poor working environments. |

### 3. Overall job satisfaction score among primary care workers

| Study [Citation]                       | Study period | Province/city                              | Area  | Sample size | Measurement of scales | Measurement of overall satisfaction | Job satisfaction score | Standard deviation |
|----------------------------------------|--------------|--------------------------------------------|-------|-------------|-----------------------|-------------------------------------|------------------------|--------------------|
| Liu <i>at all.</i> , 2010              | 2007         | Anhui                                      | rural | 77          | Likert 5 point        | Sum of dimension                    | 3.76*                  | -                  |
| Liu <i>at all.</i> , 2010              | 2007         | Xinjiang                                   | rural | 95          | Likert 5 point        | Sum of dimension                    | 4.49*                  | -                  |
| Ding <i>at all.</i> , 2013             | 2009         | Anhui                                      | urban | 765         | Likert 5 point        | Sum of dimension                    | 3.06                   | 0.497              |
| Ge <i>at all.</i> , 2011 <sup>22</sup> | 2009-2010    | Shenyang City                              | urban | 1010        | Likert 5 point        | Sum of dimension                    | 3.36*                  | -                  |
| Ge <i>at all.</i> , 2011 <sup>22</sup> | 2009-2010    | Benxi City                                 | urban | 684         | Likert 5 point        | Sum of dimension                    | 3.50*                  | -                  |
| Shi <i>at all.</i> , 2014              | 2011         | 5 provinces                                | both  | 863         | Likert 5 point        | Sum of dimension                    | 3.43                   | 0.77               |
| Hung <i>at all.</i> , 2013             | 2011         | Jilin, Anhui, Shandong, Chongqing, Ningxia | both  | 823         | Likert 5 point        | Sum of dimension                    | 3.39                   | -                  |
| Wu <i>at all.</i> , 2014               | 2012         | Zhejiang                                   | both  | 111         | Likert 5 point        | Sum of dimension                    | 3.23                   | 0.06               |
| Li <i>at all.</i> , 2014               | 2012         | Heilongjiang                               | urban | 448         | Likert 5 point        | Sum of dimension                    | 3.69                   | -                  |
| Ding <i>at all.</i> , 2013             | 2012         | Anhui                                      | urban | 495         | Likert 5 point        | Sum of dimension                    | 3.13                   | 0.643              |
| Luo <i>at all.</i> , 2014              | 2012         | Hubei, Hebei, Guizhou, Guangdong, Zhejiang | urban | 3220        | Likert 5 point        | Sum of dimension                    | 3.37                   | -                  |



|    |                                                                                                                                               |      |                                                  |       |      |                |                  |       |      |
|----|-----------------------------------------------------------------------------------------------------------------------------------------------|------|--------------------------------------------------|-------|------|----------------|------------------|-------|------|
| 1  |                                                                                                                                               |      |                                                  |       |      |                |                  |       |      |
| 2  |                                                                                                                                               |      |                                                  |       |      |                |                  |       |      |
| 3  |                                                                                                                                               |      |                                                  |       |      |                |                  |       |      |
| 4  |                                                                                                                                               |      |                                                  |       |      |                |                  |       |      |
| 5  | Sun <i>at all.</i> , 2013                                                                                                                     | 2013 | Zhejiang, Guangdong,<br>Guizhou, Hebei,<br>Hubei | urban | 3212 | Likert 5 point | Sum of dimension | 3.44  | -    |
| 6  |                                                                                                                                               |      |                                                  |       |      |                |                  |       |      |
| 7  |                                                                                                                                               |      |                                                  |       |      |                |                  |       |      |
| 8  |                                                                                                                                               |      |                                                  |       |      |                |                  |       |      |
| 9  | Fang <i>at all.</i> , 2014                                                                                                                    | 2012 | Hubei                                            | rural | 1889 | Likert 5 point | Sum of dimension | 2.57  | -    |
| 10 |                                                                                                                                               |      |                                                  |       |      |                |                  |       |      |
| 11 | Zhang <i>at all.</i> , 2017                                                                                                                   | 2013 | Shanghai, Shaanxi,<br>Shandong,<br>Anhui         | urban | 656  | Likert 5 point | Standalone item  | 3.55  | 0.74 |
| 12 |                                                                                                                                               |      |                                                  |       |      |                |                  |       |      |
| 13 |                                                                                                                                               |      |                                                  |       |      |                |                  |       |      |
| 14 |                                                                                                                                               |      |                                                  |       |      |                |                  |       |      |
| 15 | Li <i>at all.</i> , 2014                                                                                                                      | 2013 | Heilongjiang                                     | urban | 930  | 4 point        | Sum of dimension | 3.11  | 0.68 |
| 16 |                                                                                                                                               |      |                                                  |       |      |                |                  |       |      |
| 17 | Zhang <i>at all.</i> , 2016                                                                                                                   | 2014 | Jiangxi                                          | rural | 935  | Likert 5 point | Standalone item  | 1.82  | 0.63 |
| 18 |                                                                                                                                               |      |                                                  |       |      |                |                  |       |      |
| 19 | Li <i>at all.</i> , 2017                                                                                                                      | 2014 | Shandong,<br>Guangxi, Shaanxi                    | rural | 1221 | 4 point        | Standalone item  | 2.43* | -    |
| 20 |                                                                                                                                               |      |                                                  |       |      |                |                  |       |      |
| 21 |                                                                                                                                               |      |                                                  |       |      |                |                  |       |      |
| 22 | Lu <i>at all.</i> , 2016                                                                                                                      | 2013 | Guangdong                                        | both  | 5845 | Likert 6 point | Sum of dimension | 3.99  | 0.99 |
| 23 |                                                                                                                                               |      |                                                  |       |      |                |                  |       |      |
| 24 |                                                                                                                                               |      |                                                  |       |      |                |                  |       |      |
| 25 | Wang <i>at all.</i> , 2017                                                                                                                    | 2013 | Shandong, Anhui,<br>Shaanxi                      | rural | 603  | Likert 5 point | Sum of dimension | 3.37  | -    |
| 26 |                                                                                                                                               |      |                                                  |       |      |                |                  |       |      |
| 27 |                                                                                                                                               |      |                                                  |       |      |                |                  |       |      |
| 28 |                                                                                                                                               |      |                                                  |       |      |                |                  |       |      |
| 29 | * We converted these scores from the sum of percentage scores into 5-grade score: Overall satisfaction = summed score/maximum total score × 5 |      |                                                  |       |      |                |                  |       |      |
| 30 |                                                                                                                                               |      |                                                  |       |      |                |                  |       |      |
| 31 |                                                                                                                                               |      |                                                  |       |      |                |                  |       |      |
| 32 |                                                                                                                                               |      |                                                  |       |      |                |                  |       |      |
| 33 |                                                                                                                                               |      |                                                  |       |      |                |                  |       |      |
| 34 |                                                                                                                                               |      |                                                  |       |      |                |                  |       |      |
| 35 |                                                                                                                                               |      |                                                  |       |      |                |                  |       |      |
| 36 |                                                                                                                                               |      |                                                  |       |      |                |                  |       |      |
| 37 |                                                                                                                                               |      |                                                  |       |      |                |                  |       |      |
| 38 |                                                                                                                                               |      |                                                  |       |      |                |                  |       |      |
| 39 |                                                                                                                                               |      |                                                  |       |      |                |                  |       |      |
| 40 |                                                                                                                                               |      |                                                  |       |      |                |                  |       |      |
| 41 |                                                                                                                                               |      |                                                  |       |      |                |                  |       |      |
| 42 |                                                                                                                                               |      |                                                  |       |      |                |                  |       |      |
| 43 |                                                                                                                                               |      |                                                  |       |      |                |                  |       |      |
| 44 |                                                                                                                                               |      |                                                  |       |      |                |                  |       |      |
| 45 |                                                                                                                                               |      |                                                  |       |      |                |                  |       |      |
| 46 |                                                                                                                                               |      |                                                  |       |      |                |                  |       |      |

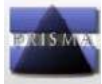

# PRISMA 2009 Checklist

| Section/topic                      | #  | Checklist item                                                                                                                                                                                                                                                                                              | Reported on page # |
|------------------------------------|----|-------------------------------------------------------------------------------------------------------------------------------------------------------------------------------------------------------------------------------------------------------------------------------------------------------------|--------------------|
| <b>TITLE</b>                       |    |                                                                                                                                                                                                                                                                                                             |                    |
| Title                              | 1  | Identify the report as a systematic review, meta-analysis, or both.                                                                                                                                                                                                                                         | 1                  |
| <b>ABSTRACT</b>                    |    |                                                                                                                                                                                                                                                                                                             |                    |
| Structured summary                 | 2  | Provide a structured summary including, as applicable: background; objectives; data sources; study eligibility criteria, participants, and interventions; study appraisal and synthesis methods; results; limitations; conclusions and implications of key findings; systematic review registration number. | 2-3                |
| <b>INTRODUCTION</b>                |    |                                                                                                                                                                                                                                                                                                             |                    |
| Rationale                          | 3  | Describe the rationale for the review in the context of what is already known.                                                                                                                                                                                                                              | 3-4                |
| Objectives                         | 4  | Provide an explicit statement of questions being addressed with reference to participants, interventions, comparisons, outcomes, and study design (PICOS).                                                                                                                                                  | 5                  |
| <b>METHODS</b>                     |    |                                                                                                                                                                                                                                                                                                             |                    |
| Protocol and registration          | 5  | Indicate if a review protocol exists, if and where it can be accessed (e.g., Web address), and, if available, provide registration information including registration number.                                                                                                                               | 5                  |
| Eligibility criteria               | 6  | Specify study characteristics (e.g., PICOS, length of follow-up) and report characteristics (e.g., years considered, language, publication status) used as criteria for eligibility, giving rationale.                                                                                                      | 5                  |
| Information sources                | 7  | Describe all information sources (e.g., databases with dates of coverage, contact with study authors to identify additional studies) in the search and date last searched.                                                                                                                                  | 5                  |
| Search                             | 8  | Present full electronic search strategy for at least one database, including any limits used, such that it could be repeated.                                                                                                                                                                               | 5                  |
| Study selection                    | 9  | State the process for selecting studies (i.e., screening, eligibility, included in systematic review, and, if applicable, included in the meta-analysis).                                                                                                                                                   | 5                  |
| Data collection process            | 10 | Describe method of data extraction from reports (e.g., piloted forms, independently, in duplicate) and any processes for obtaining and confirming data from investigators.                                                                                                                                  | 6                  |
| Data items                         | 11 | List and define all variables for which data were sought (e.g., PICOS, funding sources) and any assumptions and simplifications made.                                                                                                                                                                       | 7                  |
| Risk of bias in individual studies | 12 | Describe methods used for assessing risk of bias of individual studies (including specification of whether this was done at the study or outcome level), and how this information is to be used in any data synthesis.                                                                                      | N/A                |
| Summary measures                   | 13 | State the principal summary measures (e.g., risk ratio, difference in means).                                                                                                                                                                                                                               | 7                  |
| Synthesis of results               | 14 | Describe the methods of handling data and combining results of studies, if done, including measures of consistency (e.g., $I^2$ ) for each meta-analysis.                                                                                                                                                   | 7                  |

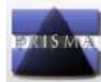

# PRISMA 2009 Checklist

| Section/topic                 | #  | Checklist item                                                                                                                                                                                           | Reported on page #     |
|-------------------------------|----|----------------------------------------------------------------------------------------------------------------------------------------------------------------------------------------------------------|------------------------|
| Risk of bias across studies   | 15 | Specify any assessment of risk of bias that may affect the cumulative evidence (e.g., publication bias, selective reporting within studies).                                                             | N/A                    |
| Additional analyses           | 16 | Describe methods of additional analyses (e.g., sensitivity or subgroup analyses, meta-regression), if done, indicating which were pre-specified.                                                         | N/A                    |
| <b>RESULTS</b>                |    |                                                                                                                                                                                                          |                        |
| Study selection               | 17 | Give numbers of studies screened, assessed for eligibility, and included in the review, with reasons for exclusions at each stage, ideally with a flow diagram.                                          | 7                      |
| Study characteristics         | 18 | For each study, present characteristics for which data were extracted (e.g., study size, PICOS, follow-up period) and provide the citations.                                                             | Supplementary Material |
| Risk of bias within studies   | 19 | Present data on risk of bias of each study and, if available, any outcome level assessment (see item 12).                                                                                                | N/A                    |
| Results of individual studies | 20 | For all outcomes considered (benefits or harms), present, for each study: (a) simple summary data for each intervention group (b) effect estimates and confidence intervals, ideally with a forest plot. | 8-14                   |
| Synthesis of results          | 21 | Present results of each meta-analysis done, including confidence intervals and measures of consistency.                                                                                                  | 14-15                  |
| Risk of bias across studies   | 22 | Present results of any assessment of risk of bias across studies (see Item 15).                                                                                                                          | N/A                    |
| Additional analysis           | 23 | Give results of additional analyses, if done (e.g., sensitivity or subgroup analyses, meta-regression [see Item 16]).                                                                                    | N/A                    |
| <b>DISCUSSION</b>             |    |                                                                                                                                                                                                          |                        |
| Summary of evidence           | 24 | Summarize the main findings including the strength of evidence for each main outcome; consider their relevance to key groups (e.g., healthcare providers, users, and policy makers).                     | 15-19                  |
| Limitations                   | 25 | Discuss limitations at study and outcome level (e.g., risk of bias), and at review-level (e.g., incomplete retrieval of identified research, reporting bias).                                            | 19-20                  |
| Conclusions                   | 26 | Provide a general interpretation of the results in the context of other evidence, and implications for future research.                                                                                  | 20                     |
| <b>FUNDING</b>                |    |                                                                                                                                                                                                          |                        |
| Funding                       | 27 | Describe sources of funding for the systematic review and other support (e.g., supply of data); role of funders for the systematic review.                                                               | 21                     |

From: Moher D, Liberati A, Tetzlaff J, Altman DG, The PRISMA Group (2009). Preferred Reporting Items for Systematic Reviews and Meta-Analyses: The PRISMA Statement. PLoS Med 6(6): e1000097. doi:10.1371/journal.pmed1000097

For more information, visit: [www.prisma-statement.org](http://www.prisma-statement.org).

# BMJ Open

## Motivating factors on performance of primary care workers in China: A systematic review and meta-analysis

|                                 |                                                                                                                                                                                                                                                                                                                          |
|---------------------------------|--------------------------------------------------------------------------------------------------------------------------------------------------------------------------------------------------------------------------------------------------------------------------------------------------------------------------|
| Journal:                        | <i>BMJ Open</i>                                                                                                                                                                                                                                                                                                          |
| Manuscript ID                   | bmjopen-2018-028619.R1                                                                                                                                                                                                                                                                                                   |
| Article Type:                   | Original research                                                                                                                                                                                                                                                                                                        |
| Date Submitted by the Author:   | 12-Jul-2019                                                                                                                                                                                                                                                                                                              |
| Complete List of Authors:       | Li, Huiwen; China Centre for Health Development Studies, Peking University<br>Yuan, Beibei; China Centre for Health Development Studies, Peking University<br>Wang, Dan; China Centre for Health Development Studies, Peking University<br>Meng, Qingyue; China Centre for Health Development Studies, Peking University |
| <b>Primary Subject Heading</b>: | Public health                                                                                                                                                                                                                                                                                                            |
| Secondary Subject Heading:      | Health services research, Health policy, General practice / Family practice                                                                                                                                                                                                                                              |
| Keywords:                       | Primary health care, Primary health worker, Motivation, Performance, Health policy < HEALTH SERVICES ADMINISTRATION & MANAGEMENT                                                                                                                                                                                         |
|                                 |                                                                                                                                                                                                                                                                                                                          |

SCHOLARONE™  
Manuscripts

1  
2  
3  
4 **1 Motivating factors on performance of primary care workers in China:**  
5  
6  
7 **2 A systematic review and meta-analysis**  
8  
9

10  
11  
12  
13  
14  
15  
16  
17  
18  
19  
20  
21  
22  
23  
24  
25  
26  
27  
28  
29  
30  
31  
32  
33  
34  
35  
36  
37  
38  
39  
40  
41  
42  
43  
44  
45  
46  
47  
48  
49  
50  
51  
52  
53  
54  
55  
56  
57  
58  
59  
60

3

4 Huiwen Li, Beibei Yuan\*, Dan Wang and Qingyue Meng

5

6 China Centre for Health Development Studies, Peking University, Beijing, China

7 (H Li Ph.D, Prof. B Yuan Ph.D, D Wang MD, Prof. Q Meng Ph.D)

8 Email: hli@bjmu.edu.cn, beibeiyuan@pku.edu.cn, wangdanevelyn@163.com,

9 qmeng@pku.edu.cn

10

11 Correspondence: Prof Beibei Yuan, China Centre for Health Development Studies, Peking

12 University, Beijing 100191, China

13 Email: beibeiyuan@pku.edu.cn

14

15 **Number of tables and figures:** 2 tables and 3 figures are included in this article.

16

17

18

## 19 Abstract

20 **Objective:** Although China has made remarkable progress in strengthening its primary health  
21 care system, lack of well-performed primary health workforce is still the bottleneck of  
22 deepening the reform. The objective of this review is to understand the current profile of  
23 Chinese primary care workers (PCWs) and their motivating factors of performance and  
24 propose targeted policy suggestions on improving their work performance.

25 **Design:** Systematic review

26 **Methods:** A systematic search of PubMed and MEDLINE was conducted to identify articles  
27 published from Jan 1, 2000 to Jun 2, 2018. Quality assessment and data extraction for the  
28 studies closely relevant to performance of PCWs in China were conducted by two reviewers  
29 independently. A preliminary framework containing different levels of factors influencing  
30 PCWs' motivation based on ERG theory guided the synthesis analysis. In addition, we used a  
31 random-effects model to pool individual studies on job satisfaction and estimate the overall  
32 job satisfaction of PCWs.

33 **Results:** A total of 36 articles were included; 16 (23 882 participants) in the meta-analysis.  
34 Regarding the individual level of motivation, 3 overarching themes and 12 sub-themes were  
35 developed. The sub-themes of financial incentives, career advancement and work itself were  
36 frequently mentioned and have more influences on PCWs' performance. Moreover, the  
37 healthcare system reform policies have inevitable and complex impacts on different levels of  
38 human needs, and then influences on the motivation and performance of PCWs.  
39 Meta-analysis showed that the overall job satisfaction score among PCWs was 3.30, just

1  
2  
3  
4 40 reaching a satisfied rating and varied in different regions.  
5  
6

7 41 **Conclusions:** This study suggests low work satisfaction among PCWs in China, with  
8  
9  
10 42 financial incentives and career advancement being two most important motivating factors.  
11  
12 43 Efforts to improve the work performance in PCWs should give priority to these motivating  
13  
14  
15 44 factors and systematically take into account the health policy's impacts on performance of  
16  
17 45 PCWs.  
18  
19

## 20 46 **Keywords**

21  
22  
23  
24 47 Primary health care, Primary care worker, Performance, Motivation, Health policy  
25  
26

## 27 48 **Strengths and limitations of this study**

28  
29  
30 49 ► A myriad of potentially eligible articles were screened and included using a comprehensive  
31  
32  
33 50 search strategy.  
34  
35

36 51 ► Reliability of the study selection, data extraction and quality assessment was ensured by  
37  
38  
39 52 involving two independent reviewers.  
40  
41

42 53 ► This review contributes to the current literature as it included studies that adopted  
43  
44  
45 54 qualitative, quantitative or mix methods to present a comprehensive overview of the  
46  
47  
48 55 motivating factors on performance of China's primary care workers.  
49

50 56 ► This study benefited from summarizing all the motivating factors on performance of  
51  
52  
53 57 China's primary care workers in a systematical way, namely, at both an individual level and a  
54  
55  
56 58 health system level.  
57

58  
59 59 ► Chinese articles were not included in this review.  
60

## 60 Introduction

61 In China, the primary health care (PHC) services that include public health services and basic  
62 medical health services are provided by community health centres (CHCs) and their affiliated  
63 community health stations (CHSs) in the urban areas and by township health centres (THCs)  
64 and their affiliated village clinics (VCs) in the rural areas. These four types of PHC  
65 institutions constitute the essential part of China's three-tertiary health care delivery network.  
66 Administered by CHCs and THCs respectively, CHSs and VCs function as the satellite sites  
67 of their superior institutions. As is central to China's health system reform initiated in 2009<sup>1</sup>,  
68 the strengthening of the primary health care has been hindered by the grave challenges  
69 concerning the structure of China's health care delivery system, in particular, the  
70 low-performance of PHC delivery system<sup>2</sup>. From 2010 to 2016, China's PCWs have  
71 experienced a rise in their number from 3.3 million to 3.7 million, but a decrease in their  
72 proportion in health workers, from 40.0% to 33.0%. This trend is mirrored by the utilization  
73 of health services during the same period of time: PHC institutions' proportion has dropped  
74 from 61.9% (3.6 billion visits) to 55.1% (4.4 billion visits) in terms of the outpatient visits  
75 and from 27.9% (39.5 million hospitalizations) to 18.3% (41.7 million hospitalizations) in  
76 terms of the inpatient visits<sup>3</sup>. Against this backdrop, the strengthening of primary health  
77 system will remain as the focus of health system reform in the near future, which can be seen  
78 from the fact that *the Outline of Healthy China 2030 Plan*, the government's blueprint for  
79 health system development, has underscored the importance of primary health care<sup>4</sup>.  
80 Health workforce shortage is one of the major obstacles to strengthen China's primary health  
81 care services<sup>5</sup>. To make matters worse, the primary health workforce is confronted with



1  
2  
3  
4 82 serious challenges such as low education level, lack of qualifications, aging, high turnover  
5  
6 83 and poor working performance<sup>6</sup>. Of all the determinants of PCWs' performance, work  
7  
8  
9 84 motivation, defined as an individual's degree of willingness to exert and maintain an effort  
10  
11 85 towards organizational goals<sup>7</sup>, plays a crucial role in changing the behavior of health  
12  
13  
14 86 providers. It has been demonstrated that work motivation can influence job satisfaction, hence  
15  
16  
17 87 influencing job performance<sup>8 9</sup>. There has been an expanding body of studies exploring the  
18  
19  
20 88 motivating factors for PCWs through qualitative, quantitative or mixed methods, but the study  
21  
22  
23 89 sites and methodological quality of these studies varied. Synthesizing these motivating factors  
24  
25 90 in different areas of China could help identify the most important motivating factors and  
26  
27 91 appreciate the overall job satisfaction level of PHWs in China. In addition, synthesizing the  
28  
29  
30 92 motivating factors for PCWs and analyzing the complexity pathway between motivating  
31  
32  
33 93 factors and performance hold general and applicable implications for improving the  
34  
35 94 motivation and performance of China's PCWs. In light of this, this review aims to synthesize  
36  
37  
38 95 and analyze the motivating factors for PCWs and provide evidence-based policy implication  
39  
40  
41 96 on how to improve the performance of China's PCWs.

## 97 **Methods**

### 98 **Search strategy and eligibility criteria**

99 We searched the PubMed and MEDLINE on June 2, 2018 to identify relevant studies  
100 using MeSH terms in conjunction with free-text words including all the possible synonyms,  
101 alternative terms and spellings<sup>6</sup> to increase sensitivity to any potentially eligible literature. All  
102 the search terms were provided in the Supplementary Appendix 1. Search results were

1  
2  
3  
4 103 exported to EndNote X7 to be organized and duplicate records were removed in the first  
5  
6 104 place. Then two authors exported the citations to Microsoft Excel and conducted the literature  
7  
8  
9 105 screening and selection independently. Divergent judgments were settled through discussion.  
10  
11 106 We searched for and included articles about the motivating factors on performance of the  
12  
13 107 PCWs who work in four types of China's PHC institutions: rural THCs, rural VCs, urban  
14  
15  
16 108 CHCs and urban CHSs. In this study, motivation in the work context is defined as an  
17  
18  
19 109 individual's degree of willingness to exert and maintain an effort towards organizational or  
20  
21  
22 110 system goals<sup>10</sup>, and the degree of job satisfaction, work stress and turnover intention seen as  
23  
24  
25 111 possible reflections of motivation which may influence work performance. Therefore, all the  
26  
27  
28 112 studies that explored the level of work motivation, job satisfaction, work stress, turnover  
29  
30  
31 113 intention and the influencing factors of these motivation expressions were included. We also  
32  
33 114 searched for relevant studies found in the references of the included articles and other sources.  
34  
35 115 The included studies adopted either observational or experimental design, and presented  
36  
37  
38 116 primary quantitative or qualitative data. All the included articles were in English language  
39  
40  
41 117 and published between 2000 and 2018. Studies were excluded if they did not address the  
42  
43  
44 118 motivating factors for PCWs, or if the participants were not PCWs or did not work in the four  
45  
46  
47 119 types of PHC institutions mentioned above.

## 120 **Assessment of risk of bias**

121 Methodological quality of the included studies was evaluated using Hoy's risk of bias  
122 tool which is adapted from the one developed by Leboeuf-Yde and Lauritsen<sup>11</sup>. Based on a  
123 total score, studies are put into three categories: low risk of bias (8-10), moderate risk of bias

1  
2  
3  
4 124 (5-7) and high risk of bias (0-4).  
5  
6  
7

8 125 **Data extraction and synthesis**  
9

10  
11 126 Extracted data included study design, year or years of study, settings, participants,  
12  
13 127 sample sizes, measurement of motivation, objective, key motivation, conclusions and  
14  
15  
16 128 motivating factors. Data extraction and analysis were guided by Alderfer's ERG theory, which  
17  
18 129 proposes three core human needs in organizational settings: existence (the desire for material  
19  
20 130 things), relatedness (the desire for cordial interpersonal relations), and growth (the desire for  
21  
22 131 opportunities to be creative and to develop one's skills)<sup>12</sup>. A thematic synthesis approach was  
23  
24 132 adopted for data analysis to capture the evidence illustrating PCWs' motivation. Motivating  
25  
26 133 factors extracted from the included articles were grouped into four themes: 1) factors  
27  
28 134 concerning the existence needs, including payment, fringe benefits and physical working  
29  
30 135 conditions; 2) factors concerning the relatedness needs, which are concerned with social  
31  
32 136 environment and relationship; 3) factors concerning the growth needs, referring to career or  
33  
34 137 self-development and management environment; 4) factors concerning the health policy  
35  
36 138 context and organizational context that could influence one or more needs categories  
37  
38 139 mentioned above. The first three themes of motivating factors represented, at an individual  
39  
40 140 level, three different dimensions of human needs in PHC institutions based on the ERG  
41  
42 141 framework and the last theme was singled out because different health policies had complex  
43  
44 142 impacts on the performance by influencing more than one dimension of human needs at a  
45  
46 143 macro level. First, authors aggregated data into motivating factors and extracted all original  
47  
48 144 motivating factors in each article to put them into one of the four themes. Then we identified  
49  
50  
51  
52  
53  
54  
55  
56  
57  
58  
59  
60

1  
2  
3  
4 145 correlations between the different factors, refined them through discussion and synthesized  
5  
6  
7 146 similar factors into a higher level theme.  
8  
9

10 147 As job satisfaction was positively associated with job performance<sup>13</sup> and nearly half of  
11  
12 148 the selected articles studied job satisfaction with quantitative measurement, we resorted to  
13  
14  
15 149 meta-analysis to synthesize the 16 articles that provide data of PCWs' job satisfactions. We  
16  
17  
18 150 unified the measurement of overall job satisfaction by transforming different calculations into  
19  
20  
21 151 a 5-point rating scale and pooled the study-specific estimates using a random effects  
22  
23 152 meta-analysis model to obtain an overall summary of the job satisfaction scores across studies  
24  
25  
26 153 <sup>14</sup>. We analyzed the data using Stata version 14.0 for Windows.  
27  
28

#### 29 154 **Patient and public involvement**

30  
31  
32 155 Patients and public were not involved in this study.  
33  
34  
35

#### 36 156 **Role of the funding source**

37  
38  
39  
40 157 The funders of the study had no role in study design; data collection, analysis and  
41  
42 158 interpretation; writing of the report; and the decision to submit the paper for publication.  
43  
44  
45

### 46 159 **Results**

#### 50 160 **Characteristics of reviewed studies**

51  
52  
53 161 We firstly screened 5466 titles and abstracts, and then retrieved and screened the  
54  
55  
56 162 full-texts of 348 potential relevant studies to evaluate their eligibility (Figure 1). After the full  
57  
58  
59 163 text screening, 119 studies relevant to the human resources of PHC in China were included  
60

1  
2  
3  
4 164 for us to appreciate the current status of PCWs. To obtain sufficient information related to the  
5  
6 165 motivation of PCWs, 1 additional article from reference search was also identified and  
7  
8  
9 166 included after applying the eligibility criteria. Finally, of the 119 studies, 83 articles that did  
10  
11 167 not contain specific motivating factors were excluded; 36 articles that were closely relevant to  
12  
13  
14 168 PCWs' motivation for were selected for data extraction and synthesis. A list of the basic  
15  
16  
17 169 characteristics of the included articles can be found in Supplementary Appendix 2. 25  
18  
19 170 quantitative, 7 qualitative, and 4 mixed methods primary studies were included, covering at  
20  
21  
22 171 least 27 provinces of China. All of the 36 articles were cross-sectional studies, with 17 studies  
23  
24  
25 172 taking place in rural China, 11 in urban China and 8 in both China's urban and rural areas. Of  
26  
27 173 the 17 studies concerning rural areas, 8 articles only included village doctors in village clinics  
28  
29  
30 174 as participants, 5 articles only studied health workers in THCs and 4 articles were concerned  
31  
32  
33 175 with rural PCWs in both village clinics and THCs. The 11 studies that were concerned with  
34  
35  
36 176 urban areas addressed urban PCWs in community health centers/stations. 4 articles studied all  
37  
38 177 types of PCWs in different kinds of rural and urban PHC institutions. As for the risk of bias,  
39  
40  
41 178 more than half of the included studies presented a low risk of bias, with the total score  
42  
43 179 ranging from six points to ten points (in Supplementary Appendix 2). Included studies  
44  
45  
46 180 analyzed the motivation of PCWs from different perspectives: some measured job satisfaction  
47  
48 181 <sup>15-30</sup>; some explored the motivating factors' influence on attrition and retention<sup>18 22 31-35</sup>; some  
49  
50  
51 182 studied the impact of some policies or interventions on the motivating factors for health  
52  
53  
54 183 workers <sup>31 36-40 41-46</sup>.

## 184 **Motivating factors for PCWs**

1  
2  
3  
4 185 **Factors concerning existence needs**

5  
6  
7 186 Financial incentives, workload and the work conditions related to a person's physical  
8  
9  
10 187 needs such as food, clothing, and shelter were clustered into factors concerning existence  
11  
12 188 needs. In this review, we found that work conditions, payment and the mandatory workload  
13  
14  
15 189 were considered as significant factors of PCWs' satisfaction<sup>15 19 20 22 23 25 30 47</sup> and turnover  
16  
17 190 intention<sup>18 22</sup>. 26 out of the 36 articles reported financial incentives (Table 1) and found that  
18  
19  
20 191 the financial incentives such as income and fringe benefits were significantly associated with  
21  
22 192 job satisfaction<sup>15 17 30</sup> and difficulties in PCW recruitment<sup>32 34 35</sup>. Moreover, financial  
23  
24  
25 193 incentives and working conditions were the top two motivating factors for PCWs to improve  
26  
27  
28 194 performance<sup>21 33</sup>.

29  
30  
31 195 Another line of inquiry explored the impact of different health system reform policies  
32  
33 196 on motivating factors. For example, in a qualitative study, administrators and frontline  
34  
35 197 healthcare workers in PHC institutions mentioned that the increased income after the 2009  
36  
37 198 health system reforms did not fully reflect the increased workload, and those who worked the  
38  
39 199 most were not necessarily rewarded the most, constituting a demotivating factor for some  
40  
41  
42 200 health workers<sup>37</sup>.

43  
44  
45  
46  
47 201 **Factors concerning relatedness needs**

48  
49  
50 202 Relatedness needs refer to a person's interpersonal needs in his personal and  
51  
52  
53 203 professional settings and in this review, factors concerning relatedness needs were deemed as  
54  
55 204 a person's relationships with the living environment, the society, the coworkers and the nature  
56  
57  
58 205 of work.

1  
2  
3  
4 206 17 studies reported work itself and 11 studies reported work relationships (Table 1).  
5  
6 207 Compared with factors concerning existence needs, the PCWs were more satisfied with the  
7  
8  
9 208 nature of work and work relationships<sup>20 25 30</sup>. This finding indicated that most workers got  
10  
11  
12 209 along well with their colleagues and believed that their jobs were to be of value, which can  
13  
14 210 act as a motivating factor in case of poor physical environment.

17  
18 211 13 of the selected studies reported recognition from society including being understood  
19  
20 212 by society and physician-patient relationships (Table 1). Satisfaction with social status and  
21  
22 213 relationship with patients was significantly associated with job satisfaction<sup>15 30</sup>. In terms of  
23  
24 214 patients' respect, there seemed to be an urban-rural difference, with the rural PCWs being  
25  
26 215 slightly more satisfied than their urban counterparts<sup>23</sup>. However, few rural PCWs expressed  
27  
28 216 satisfaction with their current relationships and indicated that the patients could not  
29  
30 217 understand the doctor's work<sup>47</sup>. In addition, the growing workplace violence negatively  
31  
32 218 affected the PCWs' job performance and quality of life<sup>48</sup> and emerged as a major contributor  
33  
34 219 to doctors' low morale in recent years<sup>16</sup>.

40  
41 220 6 studies reported living environment as a factor concerning relatedness needs (Table  
42  
43 221 1) and showed that compared with urban areas, rural areas had greater needs to improve the  
44  
45 222 living environment<sup>21 33</sup>. In addition, young health workers' weakening sense of belonging and  
46  
47 223 responsibility to their hometown has made it more difficult to recruit young health workers  
48  
49 224 born in local areas<sup>32</sup>.

#### 225 **Factors concerning growth need factors**

56  
57  
58 226 Career advancement, training, rewards, management and autonomy relating to a  
59  
60

1  
2  
3  
4 227 person's needs of personal development were considered as factors concerning growth needs  
5  
6 228 in this review.  
7  
8  
9

10 229 19 out of the 36 articles reported the factor of career advancement (Table 1), which was  
11  
12 230 considered as the one of top three contributors to satisfaction<sup>15 16 19 20 22 23 29</sup>. The gap between  
13  
14 231 the expected and actual professional development was one of the main sources of job  
15  
16 232 dissatisfaction<sup>17</sup>. Limited opportunities for job promotion was another factor contributing to  
17  
18 233 the low levels of work passion<sup>19</sup> and turnover intentions of village doctors<sup>18 22</sup>. The main  
19  
20 234 causes might be that few positions and opportunities were available for the health  
21  
22 235 professionals in PHC institutions to get higher professional titles on the regular payroll,  
23  
24 236 especially compared with the opportunities that their counterparts in higher level health  
25  
26 237 institutions can enjoy.  
27  
28  
29  
30  
31  
32

33 238 Training was mentioned as a motivating factor by 13 out of the 36 articles (Table 1).  
34  
35 239 Learning and training were significantly associated with work passion<sup>19</sup>, job satisfaction<sup>15</sup>  
36  
37 240 <sup>29</sup>and turnover intention<sup>22</sup>. Along with career advancement, training was also considered as  
38  
39 241 one of the most important motivating factors for PCWs to improve performance<sup>21</sup>. However,  
40  
41 242 training arrangements were inadequate<sup>34 49 50</sup> to address the fragmented needs of China's  
42  
43 243 PCWs. Health workers preferred more training time for practice-focused training (on-site  
44  
45 244 guidance from senior doctors and further clinical education) over knowledge-focused training,  
46  
47 245 and favoured such training contents as clinical skills, preventive healthcare and medication  
48  
49 246 knowledge education<sup>49</sup>. As a result, although training was reported as an effective incentive  
50  
51 247 in recruitment, it failed to act as an effective motivating factor to attract young doctors to rural  
52  
53 248 areas in China<sup>34</sup>.  
54  
55  
56  
57  
58  
59  
60



1  
2  
3  
4 249 Among the selected studies, the number of studies that reported the motivating factors  
5  
6 250 of rewards, management and autonomy stood at 9, 9 and 14, respectively (Table 1).  
7  
8  
9 251 According to most of the selected articles, PCWs were relatively satisfied with the  
10  
11 252 decision-making ability of their superiors, the contingent rewards and the opportunities to do  
12  
13  
14 253 work by making decisions on their own and to utilize their professional skills and talents <sup>15 22</sup>.

### 254 **System and policy factors**

255 Motivation was not only influenced by the motivating factors at the individual level,  
256 but also by the health sector reforms and specific incentive schemes that target workers <sup>7</sup>.  
257 Theoretically, any health sector reform would directly influence the motivating factors that  
258 the health workers feel or that affect the structure of health organizations, thus in turn  
259 affecting the work rewards of the health workers. 18 out of the 36 articles reported  
260 macro-level factors (Table 1), namely, the health system and policy factors such as National  
261 Essential Medicines System (NEMS), National Basic Public Health Service Program  
262 (NBPHSP) and Township and Village Health Services Integration Management (TVHSIM).  
263 The gap between the intended and actual consequences of the policies was one of the main  
264 determinants of job satisfaction <sup>17</sup>. The comprehensive reform of PHC in Anhui has changed  
265 PCWs' compensation structure and improved their income and work efficiency, but  
266 dampened their work enthusiasm because of the poorly designed performance-based  
267 evaluation system<sup>37</sup>. Different economic status and health reform processes may lead to  
268 different consequences. Take the comprehensive reform of PHC in Shandong as an example.  
269 PCWs there on the one hand complained about increased trivialities at work, heavier  
270 workload, blurry job description, unsatisfactory income and a lack of professional

1  
2  
3  
4 271 development, but on the other hand were satisfied with the relationships with the community  
5  
6 272 and low work pressure<sup>41</sup>.  
7  
8  
9

10 273 The NEMS included a new National Essential Drugs List to ensure free access to safe  
11  
12 274 and effective medication for the patients, and introduced a series of polices on drug  
13  
14  
15 275 production, pricing and distribution in the hope of promoting the rational use of medications  
16  
17 276 by reducing the reliance on drug sales and profit seeking behaviors. To be more specific, only  
18  
19  
20 277 drugs on the list were allowed to be prescribed in VCs and price mark-ups were forbidden.  
21  
22  
23 278 The impacts of the NEMP varied by region, professional practice and income level<sup>42</sup>. In one  
24  
25 279 survey, most PCWs perceived no change in their income and reported a high level of  
26  
27  
28 280 satisfaction towards NEMS<sup>45</sup>. However, according to another in-depth interview with village  
29  
30 281 doctors<sup>36</sup>, the introduction of the essential drug list for PHC institution dramatically reduced  
31  
32  
33 282 their medical income as most areas had limited government subsidies to supplement their  
34  
35  
36 283 incomes. At the same time, they also complained that they had lost patients' trust and work  
37  
38 284 enthusiasm as the classes and total amount of essential medicines were not enough to meet  
39  
40  
41 285 daily treatment needs<sup>42 45</sup>.  
42  
43

44 286 The NBPSP starting from 2009 provided a package of basic public health services for  
45  
46  
47 287 all residents, with a focus on the management of non-communicable disease. To motivate  
48  
49 288 PCWs to provide preventive health services, the government grants subsidies based on the  
50  
51  
52 289 number of covered residents. At the beginning of this reform, due to the broad scope of basic  
53  
54  
55 290 public health services and limited financial incentives, providers felt that they were under  
56  
57 291 great stress due to the competing demands for their time and complained about the heavy  
58  
59  
60 292 workload, insufficient remuneration, staff shortage, lack of formal professional identity and

1  
2  
3  
4 293 ineffective performance appraisal. In addition, providers had to deal with the distrust and  
5  
6 294 disrespect from some residents<sup>40 46</sup>, especially those public health workers who were  
7  
8  
9 295 dismissed as having lower levels of knowledge and skill than specialists<sup>39</sup>. Providers with  
10  
11 296 more subsidies, training opportunities and integrated management had better performance in  
12  
13  
14 297 service provision<sup>44</sup>.

15  
16  
17 298 The TVHSIM required THCs, the upper-level health institutions, to direct and  
18  
19 299 supervise VCs in their routine work and their work in medicine, personnel management,  
20  
21 300 financing, and the upgrade and maintenance of facilities, resulting in mixed impacts on  
22  
23 301 village doctors. On the one hand, most village doctors felt more respected under this  
24  
25 302 integrated management because they were more recognized as health workers in a formal  
26  
27 303 health system rather than private drug salesmen. On the other hand, they were not allowed to  
28  
29 304 perform agricultural or any other side activity for extra money<sup>26 36</sup>, which negatively affected  
30  
31 305 their financial conditions.  
32  
33  
34  
35  
36  
37  
38  
39

#### 40 306 **Job satisfaction for PCWs**

41  
42  
43 307 The performance of healthcare delivery system is critically dependent on workers'  
44  
45 308 motivation which is directly mediated by workers' willingness<sup>7</sup>. As an important indicator to  
46  
47 309 measure workers' willingness to exert efforts, satisfaction is highly relevant for the  
48  
49 310 sustainable development of PHC in China. 16 included articles assessed job satisfaction as an  
50  
51 311 important dimension reflecting providers' motivation (See supplementary Appendix 3). A  
52  
53 312 total of 19 investigation samples were extracted from these 16 articles with cross-sectional  
54  
55 313 study design, representing more than half of the provinces in China. In particular, 2 articles<sup>24</sup>  
56  
57  
58  
59  
60

1  
2  
3  
4 314 <sup>25</sup> provided data of 2 provinces/cities and 1 article<sup>20</sup> represented data of two years. The overall  
5  
6  
7 315 job satisfaction score ranged from 1.82 to 4.49 and also varied from region to region (Figure  
8  
9 316 2). To be more specific, for most samples drawn from more than three provinces, the  
10  
11 317 satisfaction scores leveled off between 3.37 and 3.55, but the samples from the middle area  
12  
13  
14 318 samples scored lower than those from the eastern area. Besides, the score of Xinjiang, the  
15  
16  
17 319 representative of the western areas, was the highest among the included samples.

20 320 Meta-analysis was approached by combining results weighted by sample size and  
21  
22  
23 321 showed that the overall job satisfaction score among PCWs was 3.30, equivalent 0.66 ([95%  
24  
25 322 CI 0.61–0.71]; I<sup>2</sup>=98.7%; P<0.001; Figure 3), just reaching a level indicating satisfaction. But  
26  
27  
28 323 the overall satisfaction mean of rural health workers was lower than that of the urban health  
29  
30  
31 324 workers (Table 2).

## 34 325 **Discussion**

### 36 326 **Financial incentives and career advancement were the top two motivating factors**

37 327 **for PCWs in China.** In the included articles, the balance between remuneration,

38 328 workload, and career promotion opportunities was most frequently mentioned as a critical

39 329 motivating factor on PCW's performance. In spite of Chinese government's considerable

40 330 investments in recent years to improve the income of the health workers in PHC institutions,

41 331 the gap between the actual and expected income continued to widen due to increasing

42 332 urbanization and ever growing living costs. According to some doctors in THCs, the

43 333 performance-based salary means that 30-40% of the salary was based on their workload,

44 334 quality of service and patients' satisfaction, but due to the limit of overall revenue and revenue

1  
2  
3  
4 335 structure, the well-performing health workers can only be rewarded by reducing the income  
5  
6 336 of their co-workers with poor performance. This payment method did not work well in reality  
7  
8  
9 337 as to motivate health workers. How to improve the income level of health workers in primary  
10  
11 338 health delivery system will remain a crucial but tricky issue in the near future. Besides, as  
12  
13  
14 339 shown in our analysis in Figure 2, financial incentives were no longer the sole means to  
15  
16  
17 340 promote motivation, improve job satisfaction and enhance work performance. Other factors,  
18  
19 341 in particular, professional development, work characteristics and training, have been equally,  
20  
21  
22 342 if not more, important for China's PCWs. More specifically, the lack of chances for  
23  
24  
25 343 professional title promotion and limited career development opportunities were important  
26  
27 344 reasons that lead to turnover intention. This finding is in line with other internationally  
28  
29  
30 345 published studies and underscores the importance of the non-financial as well as the financial  
31  
32 346 incentives<sup>7 51</sup>. The ERG framework implies that the fulfillment of human needs plays an  
33  
34  
35 347 important role in PCWs' motivation, but each individual prioritizes the existence needs,  
36  
37  
38 348 relatedness needs and growth needs differently. In this review, we found that the PCWs in  
39  
40 349 China are confronted with barriers in fulfilling all of the three levels of human needs. Income  
41  
42  
43 350 security has increased, but still far lower than the expected level; the residents' recognition of  
44  
45  
46 351 and cooperation with the PCWs have played a negative role in influencing the motivation and  
47  
48 352 behaviors of health workers; career promotion system and training arrangements did not meet  
49  
50  
51 353 their growths need neither. Policy makers must realize that a health worker has multiple needs  
52  
53  
54 354 to be met simultaneously. In addition, motivation improvement should be prioritized in a way  
55  
56 355 that suits local institutional environments and personal preference. A sole focus on one type  
57  
58 356 of need at a time cannot effectively motivate PCWs<sup>52</sup>.

1  
2  
3  
4 357 **The overall job satisfaction score among PCWs was still low, especially in rural**  
5  
6 358 **areas.** As the predictor of job satisfaction, the overall job satisfaction score reflects PCWs'  
7  
8  
9 359 emotional status and to what extent their human needs are satisfied. PCWs' performance can  
10  
11  
12 360 be considerably improved by identifying the motivating factors so as to increase their work  
13  
14 361 satisfaction. The most prominent factor causing the general dissatisfaction of PCWs,  
15  
16  
17 362 especially the PCWs in rural areas, was the financial rewards from work. In 2014, the annual  
18  
19 363 income of 84.06% village doctors was less than 30 000 RMB, much lower than the average  
20  
21  
22 364 income (56 394 RMB) of the doctors in Jiangxi province's higher level health institutions,  
23  
24 365 and nearly half of the village doctors thought that they earned less than other people in the  
25  
26  
27 366 local area<sup>15</sup>. In addition, as discussed above, the health system reform policies also had  
28  
29  
30 367 indirect and negative impacts on PCWs' income level and further reduced their job  
31  
32  
33 368 satisfactions. These findings hold significant implications for policy makers and PHC  
34  
35 369 institution managers who make efforts to improve workers' job satisfaction <sup>17 28</sup>. Another  
36  
37  
38 370 finding of the synthesis was the significant differences of satisfaction scores among eastern,  
39  
40  
41 371 western and middle regions of China. There is no doubt that imbalance exist among these  
42  
43 372 regions at all levels. As for the satisfactions of PCWs, provinces in the eastern region, with  
44  
45 373 more developed economy and better health facilities, scored higher than provinces in the  
46  
47  
48 374 middle region and lower than provinces in the western region. Considering western China are  
49  
50  
51 375 remote areas with less economic development, the higher job satisfaction of PCWs may be  
52  
53 376 explained by the lower expectations of PCWs, more government subsidies and other central  
54  
55  
56 377 government supports that target remote western areas. In light of this, the government should  
57  
58  
59 378 take into account the imbalanced development of China's different areas, especially China's  
60

1  
2  
3  
4 379 middle area where the economic development and resources are limited and the central  
5  
6 380 government's subsidies are also absent.  
7  
8  
9

10  
11 381 **The health system reform and some specific policies have inevitable and indirect**

12  
13 382 **impacts on PCWs.** In 2009, China launched a landmark healthcare reform which aims at  
14  
15 383 providing affordable and equitable basic health care for all by 2020<sup>5</sup>. As strengthening the  
16  
17 384 primary health system is central to the health system reform, several policies have directly  
18  
19 385 targeted PHC institutions or PCWs. As a result, the satisfaction of pay and contingent rewards  
20  
21 386 have improved slightly, which may be attributed to the fact that PCWs' basic wages are  
22  
23 387 guaranteed by government finance<sup>20</sup>. However, despite of the progress China has made in  
24  
25 388 enhancing the primary health system, new problems and unintended consequences of related  
26  
27 389 reforms have surfaced. For example, the brain drain of experienced health workers and the  
28  
29 390 loss of patients from THCs to county hospitals have incurred a great cost<sup>6,31</sup>. As for the health  
30  
31 391 system reforms, three policies and their respective impacts on health workers' motivation  
32  
33 392 were most studied in the literature.  
34  
35  
36  
37  
38  
39  
40  
41

42 393 Since its introduction in 2009<sup>36</sup>, the NEMS has exerted a lasting impact on PCWs'  
43  
44 394 income structure. The essential drug list removed the incentives for over-prescribing,  
45  
46 395 resulting in a drop in income and a loss of autonomy<sup>31</sup> because government subsidies for  
47  
48 396 public health workers were not enough to compensate the decline in PHC institutions'  
49  
50 397 revenue from drug prescriptions. Along with the problems in drug supply procurement,  
51  
52 398 unintended consequences on health workers' motivation and related behaviors also emerged:  
53  
54 399 THCs has suffered a brain drain of experienced health workers who have flowed to county  
55  
56  
57  
58  
59  
60

1  
2  
3  
4 400 hospitals because their prescriptions have been restricted due to a limited supply of medicines  
5  
6  
7 401 and they have lost many patients as a result. In conclusion, policy makers should consider  
8  
9 402 how to reduce the policy's adverse effects on the motivation of PCWs, including how to  
10  
11 403 appropriately remunerate health workers, ensure enough clinical autonomy and supply the  
12  
13  
14 404 drugs in a timely, transparent and accountable manner.

15  
16  
17 405 At the beginning of the NBPHSP, the PCWs responsible for basic public health  
18  
19 406 services held negative attitudes toward the sustainable provision of these services because it  
20  
21  
22 407 was accompanied by a heavier workload and insufficient subsidy to compensate their efforts  
23  
24  
25 408 <sup>38 40 46 53</sup>. To motivate PCWs, the government has increased the subsidies from 15 RMB per  
26  
27  
28 409 person in 2009 to 50 RMB in 2017. However, the combination of heavy workload, rigid  
29  
30  
31 410 performance assessment procedure and lack of professional knowledge remained unchanged,  
32  
33 411 resulting in a negative effect on PCWs' job satisfaction and performance. We suggest that the  
34  
35  
36 412 evaluation of PCWs' performance be shifted from being fault-finding oriented to being  
37  
38  
39 413 support-providing oriented, such as improving the ability of public health providers or  
40  
41  
42 414 strengthening the teamwork between clinical doctors and the public health workers in order to  
43  
44  
45 415 enhance the overall delivery of these public health services.

46  
47 416 After the implementation of TVHSIM, the village doctors who had been previously  
48  
49 417 self-employed and not integrated into the formal health delivery system, were managed in the  
50  
51  
52 418 same way as THC staffs and experienced a transformation of their income structure as  
53  
54  
55 419 government subsidy has become an increasing source of income. They were motivated not  
56  
57  
58 420 only by the more stable financial subsidy from government, but also by the good reputation  
59  
60 421 and respect from local residents as health providers with formal status. However, their income



1  
2  
3  
4 422 and fringe benefits still lagged behind the regular employees in THCs, which remained an  
5  
6 423 demotivating factor for village doctors<sup>34</sup>. A well-rounded social insurance model for village  
7  
8  
9 424 doctors is urgently needed <sup>43</sup>.

10  
11  
12 425 The rationale for using ERG theory to guide the analysis lies in the fact that this  
13  
14  
15 426 needs-based theory generally encompasses work motivation, provides a useful  
16  
17 427 conceptualization of what PCWs care about (motivating factors) and explains their  
18  
19  
20 428 performance in organizations. The findings of this review suggest that PCWs can be  
21  
22  
23 429 encouraged to perform well by positive motivations responding to satisfying ERG needs, but  
24  
25 430 it should be interpreted with caution because of several limitations. First, this review only  
26  
27  
28 431 focuses on the motivating factors of PCWs' work performance, therefore, other relevant  
29  
30  
31 432 articles on motivating factors influencing the attraction of PCWs were excluded by the search  
32  
33  
34 433 strategy. Second, all the included studies analyzed PCWs' motivation from the perspective of  
35  
36 434 problems and critics, which could lead to some bias because few positive thoughts on PCW's  
37  
38  
39 435 current motivation status have been reported. Third, factors related to personal  
40  
41 436 sociodemographic characteristics and mental state were not analyzed as motivating factors.  
42  
43  
44 437 They were only exacted from the original article and presented as influencing factors, as  
45  
46 438 shown in the Supplementary Appendix 2.

47  
48  
49 439

## 50 51 52 53 440 **Conclusions**

54  
55  
56 441 Low motivation is at the crux of promoting the work performance of China's  
57  
58 442 on-service PCWs. Policy makers should take into account all level of human needs that

1  
2  
3  
4 443 influence PCWs' motivation and start from the local reality to set priorities to ensure of  
5  
6 444 PCWs' appropriate remuneration and career development opportunities. Just as illustrated by  
7  
8  
9 445 the *Global Strategy on Human Resources for Health*, efforts should be made to improve  
10  
11 446 deployment strategies, working conditions, reward systems, continuous professional  
12  
13 447 development opportunities and career pathways by adopting and implementing  
14  
15 448 evidence-based health workforce policies that are tailored to the local context so as to make  
16  
17 449 the best possible use of limited resources and enhance both capacity and motivation for  
18  
19 450 improved performance<sup>52</sup>. We also suggest that countries undergoing health system reform  
20  
21 451 should consider the views of different stakeholders and analyze the potential side effects of  
22  
23 452 some specific policies on health providers who are not directly targeted in order to benefit  
24  
25 453 both providers and demanders<sup>15</sup>.

454

## 455 **Abbreviations**

456 PCW: Primary care worker; PHC: Primary health care; CHC: Community health  
457 centre; CHS: Community health station; THC: Township health centre; VC: Village clinic;;  
458 NEMS: National Essential Medicines System; NBPHSP: National Basic Public Health  
459 Service Program; TVHSIM: Township and Village Health Services Integration Management;  
460 RMB: renminbi

## 461 **Acknowledgments**

462 We are grateful to Xi Li from National Clinical Research Center of Cardiovascular  
463 Diseases, State Key Laboratory of Cardiovascular Disease, Fuwai Hospital, National Center

1  
2  
3  
4 464 for Cardiovascular Diseases, Chinese Academy of Medical Sciences and Peking Union  
5  
6 465 Medical College, for their support and technical advice on the inclusion criteria.  
7  
8  
9

## 10 466 **Contributors**

11  
12  
13 467 All authors proposed the hypothesis and idea for the systematic review and take  
14  
15 468 responsibility for all aspects of it. QM, BY and HL discussed and contributed to the  
16  
17  
18 469 conceptualization of this review and the development of review protocol. BY applied the  
19  
20  
21 470 inclusion criteria. HL and DW extracted the data. HL was a major contributor to the draft of  
22  
23  
24 471 the manuscript. All authors read and approved the final manuscript.  
25

## 26 472 **Funding**

27  
28  
29  
30 473 This review was funded by National Natural Science Foundation of China (71403008)  
31  
32  
33 474 and Alliance for Health Policy and Systems Research, World Health Organization.  
34

## 35 475 **Competing interests**

36  
37  
38  
39 476 The authors declare that they have no competing interests.  
40  
41

## 42 477 **Provenance and peer review**

43  
44  
45 478 Not commissioned; externally peer reviewed.  
46  
47

## 48 479 **Data sharing statement**

49  
50  
51  
52 480 There are no additional data available.  
53  
54

## 55 481 **References**

- 56  
57 482 1. State Council of the People's Republic of China. Guanyu shenhua yiyao weisheng tizhi gaige de  
58 483 yijian (Opinions on Deepening Health System Reform). 2009 (in Chinese)  
59  
60 484 2. Huang J, Shi L, Chen Y. Staff retention after the privatization of township-village health centers: a

- 1  
2  
3 485 case study from the Haimen City of East China. *BMC health services research* 2013;13:136.  
4 486 doi: 10.1186/1472-6963-13-136 [published Online First: 2013/04/17]  
5  
6 487 3. National Health and Family Planning Commission of the People's Republic of China. 2016 China  
7 488 health and family planning statistical yearbook. *Beijing: Peking Union Medical College*  
8 489 *Publishing House, 2017* (in Chinese)  
9  
10 490 4. CPC Central Committee, State Council. The plan for "Healthy China 2030".2016  
11 491 [http://www.gov.cn/zhengce/2016-10/25/content\\_5124174.htm](http://www.gov.cn/zhengce/2016-10/25/content_5124174.htm) (in Chinese).  
12 492  
13 493 5. Yip WC, Hsiao WC, Chen W, et al. Early appraisal of China's huge and complex health-care reforms.  
14 494 *Lancet (London, England)* 2012;379(9818):833.  
15 495 6. Li X LJ, Hu S, Cheng KK, De Maeseneer J, Meng Q, Mossialos E, Xu DR, Yip W, Zhang H, Krumholz  
16 496 HM, Jiang L, Hu S. The primary health-care system in China. *Lancet*  
17 497 2017;390(10112):2584-94.  
18 498 7. Franco LM, Bennett S, Kanfer R. Health sector reform and public sector health worker motivation: a  
19 499 conceptual framework. *Social Science & Medicine* 2002;54(8):1255.  
20 500 8. Dolea C, Adams O. Motivation of health care workers-review of theories and empirical evidence.  
21 501 *Cahiers de sociologie et de demographie medicales* 2005;45(1):135.  
22 502 9. Fisher CD. Why do lay people believe that satisfaction and performance are correlated? possible  
23 503 sources of a commonsense theory. *Journal of Organizational Behavior* 2003;24(6):753-77.  
24 504 10. Bennett S, Franco L. Health worker motivation and health sector reform. *Bethesda, Maryland, Abt*  
25 505 *Associates, Partnerships for Health Reform, [2000] 2000*  
26 506 11. Hoy D, Brooks P, Woolf A, et al. Assessing risk of bias in prevalence studies: modification of an  
27 507 existing tool and evidence of interrater agreement. *Journal of clinical epidemiology*  
28 508 2012;65(9):934-39.  
29 509 12. Alderfer CP. Existence, relatedness, and growth: Human needs in organizational settings.  
30 510 *Contemporary Sociology* 1974;3(6):511.  
31 511 13. Judge TA, Thoresen CJ, Bono JE, et al. The job satisfaction-job performance relationship: a  
32 512 qualitative and quantitative review. *Psychological Bulletin* 2001;127(3):376-407.  
33 513 14. Zhang M, Yang R, Wang W, et al. Job satisfaction of urban community health workers after the  
34 514 2009 healthcare reform in China: a systematic review. *International Journal for Quality in*  
35 515 *Health Care Journal of the International Society for Quality in Health Care* 2015;28(1):14.  
36 516 15. Zhang X, Fang P. Job satisfaction of village doctors during the new healthcare reforms in China.  
37 517 *Australian health review : a publication of the Australian Hospital Association*  
38 518 2016;40(2):225-33. doi: 10.1071/ah15205 [published Online First: 2016/02/26]  
39 519 16. Wu D, Wang Y, Lam KF, et al. Health system reforms, violence against doctors and job satisfaction  
40 520 in the medical profession: a cross-sectional survey in Zhejiang Province, Eastern China. *BMJ*  
41 521 *open* 2014;4(12):e006431. doi: 10.1136/bmjopen-2014-006431 [published Online First:  
42 522 2015/01/02]  
43 523 17. Li L, Zhang Z, Sun Z, et al. Relationships between actual and desired workplace characteristics and  
44 524 job satisfaction for community health workers in China: a cross-sectional study. *BMC family*  
45 525 *practice* 2014;15:180. doi: 10.1186/s12875-014-0180-y [published Online First: 2014/11/19]  
46 526 18. Fang P, Liu X, Huang L, et al. Factors that influence the turnover intention of Chinese village  
47 527 doctors based on the investigation results of Xiangyang City in Hubei Province. *International*  
48 528 *journal for equity in health* 2014;13:84. doi: 10.1186/s12939-014-0084-4 [published Online  
49  
50  
51  
52  
53  
54  
55  
56  
57  
58  
59  
60

1  
2  
3  
4  
5  
6  
7  
8  
9  
10  
11  
12  
13  
14  
15  
16  
17  
18  
19  
20  
21  
22  
23  
24  
25  
26  
27  
28  
29  
30  
31  
32  
33  
34  
35  
36  
37  
38  
39  
40  
41  
42  
43  
44  
45  
46  
47  
48  
49  
50  
51  
52  
53  
54  
55  
56  
57  
58  
59  
60

- 529 19. Luo Z, Bai X, Min R, et al. Factors influencing the work passion of Chinese community health  
530 service workers: an investigation in five provinces. *BMC family practice* 2014;15:77. doi:  
531 10.1186/1471-2296-15-77 [published Online First: 2014/06/03]
- 532 20. Ding H, Sun X, Chang WW, et al. A comparison of job satisfaction of community health workers  
533 before and after local comprehensive medical care reform: a typical field investigation in  
534 Central China. *PloS one* 2013;8(9):e73438. doi: 10.1371/journal.pone.0073438 [published  
535 Online First: 2013/09/24]
- 536 21. Hung LM, Shi L, Wang H, et al. Chinese primary care providers and motivating factors on  
537 performance. *Family practice* 2013;30(5):576-86. doi: 10.1093/fampra/cmt026 [published  
538 Online First: 2013/06/22]
- 539 22. Sun Y, Luo Z, Fang P. Factors influencing the turnover intention of Chinese community health  
540 service workers based on the investigation results of five provinces. *Journal of community  
541 health* 2013;38(6):1058-66. doi: 10.1007/s10900-013-9714-9 [published Online First:  
542 2013/06/19]
- 543 23. Shi L, Song K, Rane S, et al. Factors associated with job satisfaction by Chinese primary care  
544 providers. *Primary health care research & development* 2014;15(1):46-57. doi:  
545 10.1017/s1463423612000692 [published Online First: 2013/02/08]
- 546 24. Ge C, Fu J, Chang Y, et al. Factors associated with job satisfaction among Chinese community  
547 health workers: a cross-sectional study. *BMC public health* 2011;11:884. doi:  
548 10.1186/1471-2458-11-884 [published Online First: 2011/11/25]
- 549 25. Liu JA, Wang Q, Lu ZX. Job satisfaction and its modeling among township health center employees:  
550 a quantitative study in poor rural China. *BMC health services research* 2010;10:115. doi:  
551 10.1186/1472-6963-10-115 [published Online First: 2010/05/13]
- 552 26. Li T, Lei T, Sun F, et al. Determinants of village doctors' job satisfaction under China's health sector  
553 reform: a cross-sectional mixed methods study. *International journal for equity in health*  
554 2017;16(1):64.
- 555 27. Li L, Hu H, Zhou H, et al. Work stress, work motivation and their effects on job satisfaction in  
556 community health workers: a cross-sectional survey in China. 2014;4(6):e004897.
- 557 28. Zhang M, Yan F, Wang W, et al. Is the effect of person-organisation fit on turnover intention  
558 mediated by job satisfaction? A survey of community health workers in China. *BMJ open*  
559 2017;7(2):e013872.
- 560 29. Wang H, Tang C, Zhao S, et al. Job Satisfaction among Health-Care Staff in Township Health  
561 Centers in Rural China: Results from a Latent Class Analysis. *International journal of  
562 environmental research and public health* 2017;14(10) doi: 10.3390/ijerph14101101  
563 [published Online First: 2017/09/25]
- 564 30. Lu Y, Hu XM, Huang XL, et al. Job satisfaction and associated factors among healthcare staff: a  
565 cross-sectional study in Guangdong Province, China. *BMJ open* 2016;6(7):e011388. doi:  
566 10.1136/bmjopen-2016-011388 [published Online First: 2016/07/21]
- 567 31. Zhou XD, Li L, Hesketh T. Health system reform in rural China: voices of healthworkers and  
568 service-users. *Social science & medicine (1982)* 2014;117:134-41. doi:  
569 10.1016/j.socscimed.2014.07.040 [published Online First: 2014/07/27]
- 570 32. Chen M, Lu J, Hao C, et al. Developing challenges in the urbanisation of village doctors in  
571 economically developed regions: A survey of 844 village doctors in Changzhou, China. *The  
572 Australian journal of rural health* 2015 doi: 10.1111/ajr.12159 [published Online First:

- 1  
2  
3 573 2015/03/31]
- 4 574 33. Meng Q, Yuan J, Jing L, et al. Mobility of primary health care workers in China. *Human resources*
- 5 575 *for health* 2009;7(1):24.
- 6 576 34. Wang J, Su J, Zuo H, et al. What interventions do rural doctors think will increase recruitment in
- 7 577 rural areas: a survey of 2778 health workers in Beijing. *Human resources for health*
- 8 578 2013;11:40. doi: 10.1186/1478-4491-11-40 [published Online First: 2013/08/24]
- 9 579 35. Song K, Scott A, Sivey P, et al. Improving Chinese primary care providers' recruitment and
- 10 580 retention: a discrete choice experiment. *Health policy and planning* 2015;30(1):68-77. doi:
- 11 581 10.1093/heapol/czt098 [published Online First: 2013/12/21]
- 12 582 36. Zhang S, Zhang W, Zhou H, et al. How China's new health reform influences village doctors'
- 13 583 income structure: evidence from a qualitative study in six counties in China. *Human*
- 14 584 *resources for health* 2015;13:26. doi: 10.1186/s12960-015-0019-1 [published Online First:
- 15 585 2015/05/06]
- 16 586 37. Liu Q, Tian X, Tian J, et al. Evaluation of the effects of comprehensive reform on primary
- 17 587 healthcare institutions in Anhui Province. *BMC health services research* 2014;14:268. doi:
- 18 588 10.1186/1472-6963-14-268 [published Online First: 2014/06/20]
- 19 589 38. Ding Y, Smith HJ, Fei Y, et al. Factors influencing the provision of public health services by village
- 20 590 doctors in Hubei and Jiangxi provinces, China. *Bulletin of the World Health Organization*
- 21 591 2013;91(1):64-9. doi: 10.2471/blt.12.109447 [published Online First: 2013/02/12]
- 22 592 39. Zhao Y, Cui S, Yang J, et al. Basic public health services delivered in an urban community: a
- 23 593 qualitative study. *Public health* 2011;125(1):37-45. doi: 10.1016/j.puhe.2010.09.003
- 24 594 [published Online First: 2010/12/15]
- 25 595 40. Zhou H, Zhang W, Zhang S, et al. Health providers' perspectives on delivering public health
- 26 596 services under the contract service policy in rural China: evidence from Xinjian County. *BMC*
- 27 597 *health services research* 2015;15:75. doi: 10.1186/s12913-015-0739-x [published Online First:
- 28 598 2015/04/19]
- 29 599 41. Zhang M, Wang W, Millar R, et al. Coping and compromise: a qualitative study of how primary
- 30 600 health care providers respond to health reform in China. *Human resources for health*
- 31 601 2017;15(1):50. doi: 10.1186/s12960-017-0226-z [published Online First: 2017/08/06]
- 32 602 42. Zhang T, Liu C, Ren J, et al. Perceived impacts of the national essential medicines system: a
- 33 603 cross-sectional survey of health workers in urban community health services in China. *BMJ*
- 34 604 *open* 2017;7(7):e014621. doi: 10.1136/bmjopen-2016-014621 [published Online First:
- 35 605 2017/07/13]
- 36 606 43. Feng D, Zhang L, Xiang YX, et al. Satisfaction of village doctors with the township and village health
- 37 607 services integration policy in the western minority-inhabited areas of China. *Journal of*
- 38 608 *Huazhong University of Science and Technology Medical sciences = Hua zhong ke ji da xue*
- 39 609 *xue bao Yi xue Ying De wen ban = Huazhong keji daxue xuebao Yixue Yingdewen ban*
- 40 610 2017;37(1):11-19. doi: 10.1007/s11596-017-1687-y [published Online First: 2017/02/23]
- 41 611 44. Li T, Lei T, Xie Z, et al. Determinants of basic public health services provision by village doctors in
- 42 612 China: using non-communicable diseases management as an example. *BMC health services*
- 43 613 *research* 2016;16:42. doi: 10.1186/s12913-016-1276-y [published Online First: 2016/02/06]
- 44 614 45. Song Y, Bian Y, Li L. Current perspectives on China's national essential medicine system: primary
- 45 615 care provider and patient views. *BMC health services research* 2016;16:30. doi:
- 46 616 10.1186/s12913-016-1283-z [published Online First: 2016/01/28]

- 1  
2  
3 617 46. Li X, Cochran C, Lu J, et al. Understanding the shortage of village doctors in China and solutions  
4 618 under the policy of basic public health service equalization: evidence from Changzhou. *The*  
5 619 *International journal of health planning and management* 2015;30(1):E42-55. doi:  
6 620 10.1002/hpm.2258 [published Online First: 2014/07/06]  
7  
8 621 47. Chen Q, Yang L, Feng Q. Job Satisfaction Analysis in Rural China: A Qualitative Study of Doctors in a  
9 622 Township Hospital. 2017;2017:1964087. doi: 10.1155/2017/1964087  
10  
11 623 48. Lin WQ, Wu J, Yuan LX, et al. Workplace Violence and Job Performance among Community  
12 624 Healthcare Workers in China: The Mediator Role of Quality of Life. *International journal of*  
13 625 *environmental research and public health* 2015;12(11):14872-86. doi:  
14 626 10.3390/ijerph121114872 [published Online First: 2015/11/28]  
15  
16 627 49. Li X, Liu J, Huang J, et al. An analysis of the current educational status and future training needs of  
17 628 China's rural doctors in 2011. *Postgraduate medical journal* 2013;89(1050):202-8. doi:  
18 629 10.1136/postgradmedj-2012-131094 [published Online First: 2013/02/08]  
19  
20 630 50. Mo Y, Hu G. Unmet needs in health training among nurses in rural Chinese township health  
21 631 centers: a cross-sectional hospital-based study. 2017;14:22. doi: 10.1016/j.ejon.2017.07.003  
22 632 10.3352/jeehp.2017.14.22 [published Online First: 2017/10/17]  
23  
24 633 51. Henderson LN, Tulloch J. Incentives for retaining and motivating health workers in Pacific and  
25 634 Asian countries. *Human resources for health* 2008;6(1):18.  
26  
27 635 52. Global strategy on human resources for health: Workforce 2030. *World Health Organization* 2016  
28 636 doi: [https://www.who.int/hrh/resources/global\\_strategyHRH.pdf](https://www.who.int/hrh/resources/global_strategyHRH.pdf)  
29  
30 637 53. Li T, Lei T, Zheng X, et al. Determinants of basic public health services provision by village doctors  
31 638 in China: using non-communicable diseases management as an example. *BMC health services*  
32 639 *research* 2015;16(1):42.  
33  
34  
35  
36  
37  
38  
39  
40  
41  
42  
43  
44  
45  
46  
47  
48  
49  
50  
51  
52  
53  
54  
55  
56  
57  
58  
59  
60



1  
2  
3  
4 641 **Figure legends**  
5

6  
7 642 **Figure 1.** PRISMA diagram  
8

9 643 **Figure 2.** Job satisfaction score among primary care workers across different regions in China  
10  
11

12 644 **Figure 3.** Forest plot of the job satisfaction score among primary care workers  
13  
14  
15  
16  
17  
18  
19  
20  
21  
22  
23  
24  
25  
26  
27  
28  
29  
30  
31  
32  
33  
34  
35  
36  
37  
38  
39  
40  
41  
42  
43  
44  
45  
46  
47  
48  
49  
50  
51  
52  
53  
54  
55  
56  
57  
58  
59  
60

For peer review only



645 **Tables**646 **Table 2** Means of overall job satisfaction score among primary care workers

| Study                  | No. of included studies | Mean |
|------------------------|-------------------------|------|
| All included studies   | 19                      | 3.30 |
| Studies in urban areas | 9                       | 3.35 |
| Studies in rural areas | 7                       | 3.06 |

647 **Table 1.** Motivating factors for primary care workers

For peer review only

| Motivating factor               | Definition                                                                                                             | Motivation to stay | Motivation to join/leave | Number of selected studies reporting the factors |
|---------------------------------|------------------------------------------------------------------------------------------------------------------------|--------------------|--------------------------|--------------------------------------------------|
| <b>Individual-level factors</b> |                                                                                                                        |                    |                          |                                                  |
| <b>Existence</b>                |                                                                                                                        |                    |                          |                                                  |
| Financial incentives            | Basic salary, bonus, benefits (insurances, vacation, etc.)                                                             | 22                 | 5                        | 26                                               |
| Workload                        | Hours of work, the amount of work done, flexibility in scheduling                                                      | 12                 | 1                        | 13                                               |
| Work conditions                 | Work environment, job stability, job security                                                                          | 14                 | 2                        | 15                                               |
| <b>Relatedness</b>              |                                                                                                                        |                    |                          |                                                  |
| Living environment              | Geographical location and socioeconomic level of workplace                                                             | 4                  | 2                        | 6                                                |
| Recognition in society          | Patients' respect, workplace violence, social status                                                                   | 11                 | 2                        | 13                                               |
| Work itself                     | Nature of work (interest, meaningfulness, enjoyment), job fulfilment, job achievement, work enthusiasm                 | 17                 | 1                        | 17                                               |
| Working relationships           | Relationships with coworkers/subordinates/nurses, communication                                                        | 11                 | 0                        | 11                                               |
| <b>Growth</b>                   |                                                                                                                        |                    |                          |                                                  |
| Career advancement              | Opportunities for professional development                                                                             | 17                 | 3                        | 19                                               |
| Training                        | Support for training and education, opportunity to learn new skills and new knowledge                                  | 11                 | 2                        | 13                                               |
| Rewards                         | Recognition, appreciation, contingent rewards,                                                                         | 9                  | 0                        | 9                                                |
| Management                      | Supervision (level of competence, fairness, interest in subordinates), relationship with superior                      | 8                  | 1                        | 9                                                |
| Autonomy                        | Opportunities to do work by making decisions on their own. opportunity to utilize your professional skills and talents | 14                 | 0                        | 14                                               |
| <b>Macro-level factors</b>      |                                                                                                                        |                    |                          |                                                  |
| <b>System and policy</b>        |                                                                                                                        |                    |                          |                                                  |
| The health-care reform policies | Putting organizational policies into practice e.g. NEMS, NBPHSP and TVHSIM.                                            | 18                 | 1                        | 18                                               |

1  
2  
3  
4  
5  
6  
7  
8  
9  
10  
11  
12  
13  
14  
15  
16  
17  
18  
19  
20  
21  
22  
23  
24  
25  
26  
27  
28  
29  
30  
31  
32  
33  
34  
35  
36  
37  
38  
39  
40  
41  
42  
43  
44  
45  
46

For peer review only

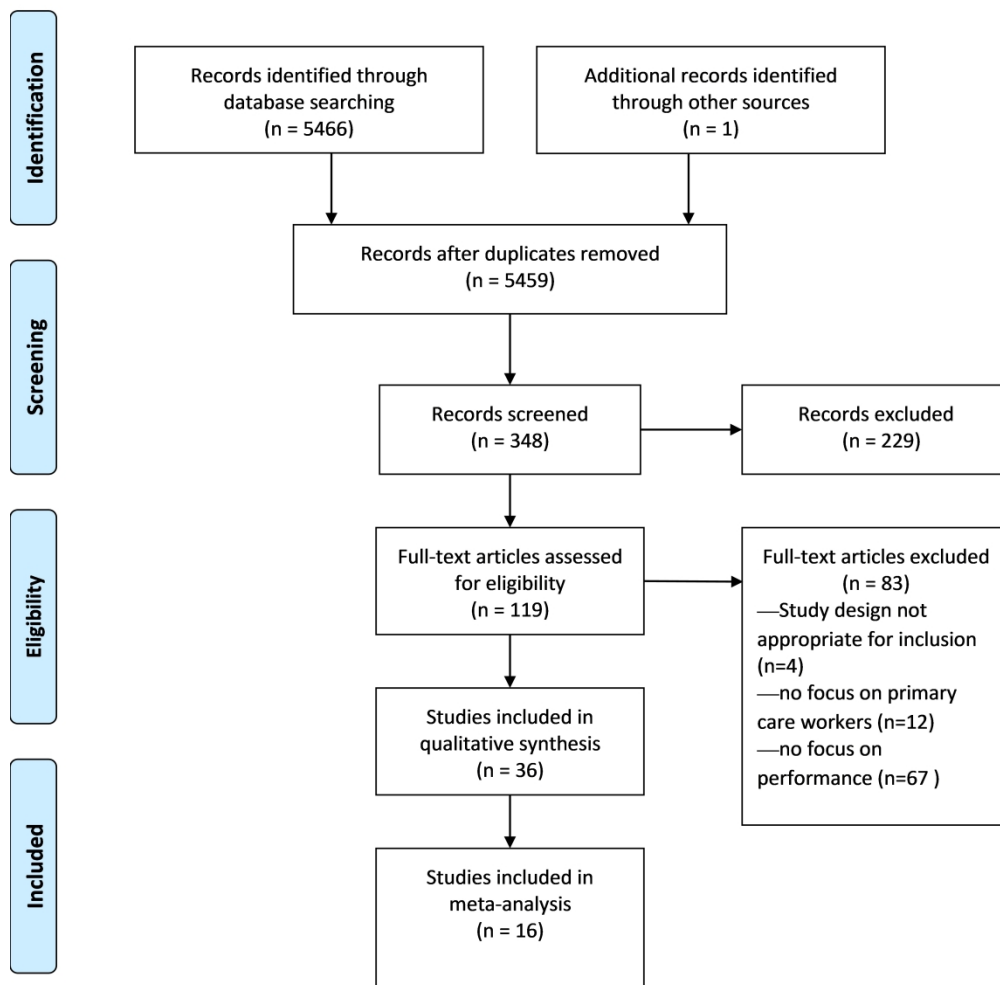

Figure 1. PRISMA diagram

370x397mm (288 x 288 DPI)

1  
2  
3  
4  
5  
6  
7  
8  
9  
10  
11  
12  
13  
14  
15  
16  
17  
18  
19  
20  
21  
22  
23  
24  
25  
26  
27  
28  
29  
30  
31  
32  
33  
34  
35  
36  
37  
38  
39  
40  
41  
42  
43  
44  
45  
46



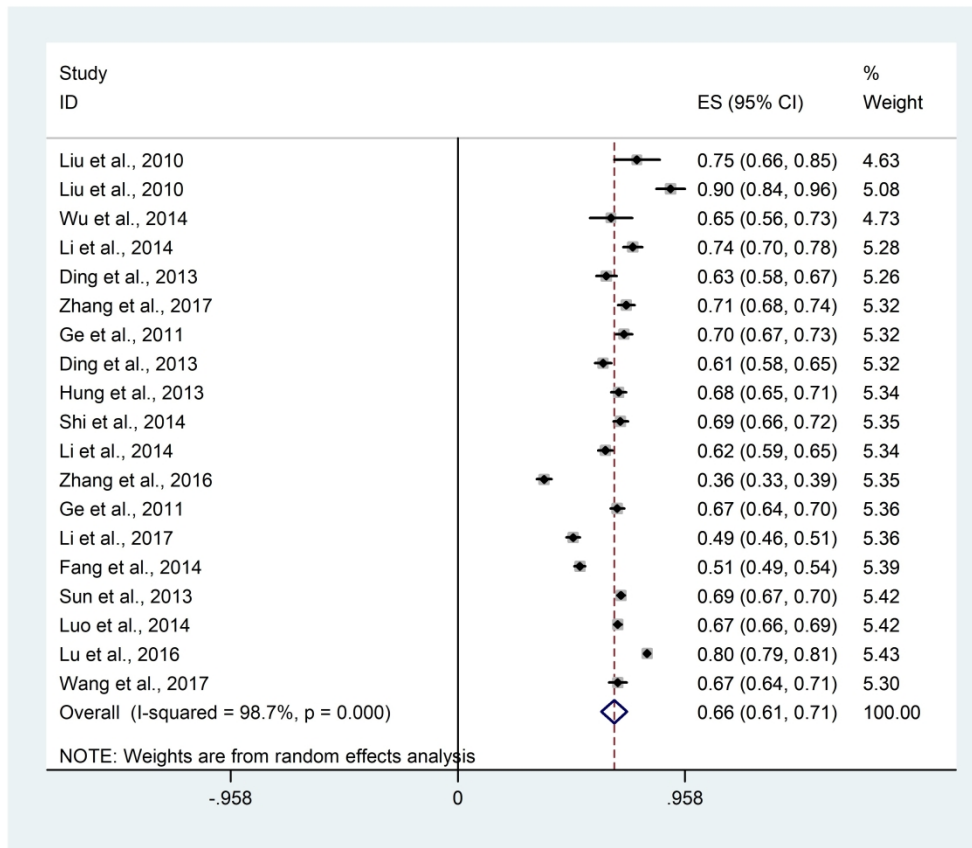

Figure 3. Forest plot of the Job satisfaction score among primary care workers

333x288mm (288 x 288 DPI)

## Supplementary Appendix

### 1. Search terms

(China[Title/Abstract] OR Chinese[Title/Abstract]) AND ("primary health care"[Mesh] OR "General Practice"[Mesh] OR "General Practitioners"[Mesh] OR "Physicians, Family"[Mesh] OR "Community Health Services"[Mesh] OR "Delivery of Health Care"[Mesh] OR "township hospital"[Title/Abstract] OR "township health center"[Title/Abstract] OR "township health centre"[Title/Abstract] OR "community health station"[Title/Abstract] OR "village clinic"[Title/Abstract] OR "community health center"[Title/Abstract] OR "community health centre"[Title/Abstract]) AND ("manpower"[Mesh] OR "Education, Public Health Professional"[Mesh] OR "Education, Professional"[Mesh] OR "Education, Medical, Continuing"[Mesh] OR "Professionalism"[Mesh] OR "Career Choice"[Mesh] OR "Career Mobility"[Mesh] OR "human resources"[Title/Abstract] OR "retention"[Title/Abstract] OR "incentives"[Title/Abstract] OR "salary"[Title/Abstract] OR "professional medical master"[Title/Abstract] OR Motivation[Mesh] OR "Salaries and Fringe Benefits"[Mesh] OR "Staff Development"[Mesh] OR recruit[Title/Abstract] OR recruited[Title/Abstract] OR recruits[Title/Abstract] OR migration[Title/Abstract] OR migrate[Title/Abstract] OR migrating[Title/Abstract] OR migrated[Title/Abstract] OR migrates[Title/Abstract] OR immigration[Title/Abstract] OR immigrate[Title/Abstract] OR immigrating[Title/Abstract] OR immigrated[Title/Abstract] OR immigrates[Title/Abstract] OR emigration[Title/Abstract] OR emigrate[Title/Abstract] OR emigrating[Title/Abstract] OR emigrated[Title/Abstract] OR emigrates[Title/Abstract] OR mobility[Title/Abstract] OR turnover[Title/Abstract] OR "brain drain"[Title/Abstract]) AND ((eng[Language]) OR chi[Language]) NOT "Autobiography"[ptyp] NOT "Bibliography"[ptyp] NOT "Biography"[ptyp] NOT "Consensus Development Conference"[ptyp] NOT "Consensus Development Conference, NIH"[ptyp] NOT "Corrected and Republished Article"[ptyp] NOT "Dataset"[ptyp] NOT "Dictionary"[ptyp] NOT "Directory"[ptyp] NOT "Duplicate Publication"[ptyp] NOT "Electronic Supplementary Materials"[ptyp] NOT "Festschrift"[ptyp] NOT "Interactive Tutorial"[ptyp] NOT "Legal Cases"[ptyp] NOT "Letter"[ptyp] NOT "News"[ptyp] NOT "Patient Education Handout"[ptyp] NOT "Periodical Index"[ptyp] NOT "Personal Narratives"[ptyp] NOT "Portraits"[ptyp] NOT "Published Erratum"[ptyp] NOT "Retracted Publication"[ptyp] NOT "Retraction of Publication"[ptyp] NOT "Twin Study"[ptyp] NOT "Video-Audio Media"[ptyp] NOT "Webcasts"[ptyp].

## 2. List of included studies' general characteristics

| Study [Citation]           | Study period  | Study design       | Province  | Area  | Institution             | Objective                                                                                                                                                                          | Key motivation conclusions                                                                                                                                                     | Influencing factors                                                                                                                                                                                                            | Risk of bias |
|----------------------------|---------------|--------------------|-----------|-------|-------------------------|------------------------------------------------------------------------------------------------------------------------------------------------------------------------------------|--------------------------------------------------------------------------------------------------------------------------------------------------------------------------------|--------------------------------------------------------------------------------------------------------------------------------------------------------------------------------------------------------------------------------|--------------|
| Zhang <i>et al.</i> , 2016 | 2014          | Quantitative study | Jiangxi   | Rural | Village Clinic          | To assess village doctors' job satisfaction during the reforms and to explore factors affecting job satisfaction.                                                                  | Low job satisfaction. The top three items leading to dissatisfaction were pay and the amount of work that had to be done, opportunities for job promotion and work conditions. | Marriage, income, intention to leave, satisfaction with learning and training, social status, relationship with patients and satisfaction with the new healthcare reforms were significantly associated with job satisfaction. | Low          |
| Lin <i>et al.</i> , 2015   | 2013.9-2014.4 | Quantitative study | Guangdong | Urban | Community Health Centre | To explore the impact of workplace violence on job performance and quality of life of community healthcare workers in China, especially the relationship of these three variables. | Workplace violence among community healthcare workers is prevalent in China.                                                                                                   | The workplace violence had negative effects on the job performance and quality of life of CHCs' workers.                                                                                                                       | Low          |



1  
2  
3  
4  
5  
6  
7  
8  
9  
10  
11  
12  
13  
14  
15  
16  
17  
18  
19  
20  
21  
22  
23  
24  
25  
26  
27  
28  
29  
30  
31  
32  
33  
34  
35  
36  
37  
38  
39  
40  
41  
42  
43  
44  
45  
46

| Study [Citation]           | Study period  | Study design       | Province                                               | Area  | Institution                                     | Objective                                                                                                                                                                                | Key motivation conclusions                                                                                                                                                                                                                     | Influencing factors                                                                                                                                                                                                                                             | Risk of bias |
|----------------------------|---------------|--------------------|--------------------------------------------------------|-------|-------------------------------------------------|------------------------------------------------------------------------------------------------------------------------------------------------------------------------------------------|------------------------------------------------------------------------------------------------------------------------------------------------------------------------------------------------------------------------------------------------|-----------------------------------------------------------------------------------------------------------------------------------------------------------------------------------------------------------------------------------------------------------------|--------------|
| Zhang <i>et al.</i> , 2015 | 2013.8-2014.1 | Qualitative Study  | Jiangsu, Henan, Jiangxi, Heilongjiang, Sichuan, Gansu. | Rural | Village Clinic                                  | To investigate the village doctors' income structure and analyze how these health policies influenced it.                                                                                | The health-care reform policies have had lasting impacts on village doctors' income structure since the policies' implementation in 2009.                                                                                                      | Several policies such as the National Essential Medicines System, Integrated management, National Basic Public Health Services, New Rural Cooperative Medical Scheme had major impact on village doctors.                                                       | Moderate     |
| Wu <i>et al.</i> , 2014    | 2012          | Quantitative study | Zhejiang                                               | Both  | Community Health Centre; Township Health Centre | To explore the factors influencing doctors' job satisfaction and morale in China, in the context of the ongoing health system reforms and the deteriorating doctor-patient relationship. | Low job satisfaction. Primary care doctors were the least dissatisfied with the income and opportunities for promotion. Patients were becoming more aggressive in their demands and there was an increasing trend of violence against doctors. | Doctors in the provincial hospital appeared to be the most dissatisfied group, and primary care physicians were most satisfied with their work and the causes of dissatisfaction fall into three main areas: low income, heavy workload and patient aggression. | Low          |

| Study [Citation]          | Study period | Study design       | Province     | Area  | Institution             | Objective                                                                                                                                                                                | Key motivation conclusions                                                                                                                                                                                                             | Influencing factors                                                                                                                                                                                                                                                                                                   | Risk of bias |
|---------------------------|--------------|--------------------|--------------|-------|-------------------------|------------------------------------------------------------------------------------------------------------------------------------------------------------------------------------------|----------------------------------------------------------------------------------------------------------------------------------------------------------------------------------------------------------------------------------------|-----------------------------------------------------------------------------------------------------------------------------------------------------------------------------------------------------------------------------------------------------------------------------------------------------------------------|--------------|
| Li <i>et al.</i> , 2014   | 2012         | Quantitative study | Heilongjiang | Urban | Community Health Centre | To assess the determinants of job satisfaction in community health workers in one Chinese province.                                                                                      | Overall job satisfaction was higher than extrinsic job satisfaction and lower than intrinsic job satisfaction. All desired workplace characteristics were higher than the associated actual workplace characteristics.                 | The main determinants of job satisfaction were occupation, years worked in health service institution, and five subscales representing the gap between desired and actual workplace characteristics, which were system and policy; fringe benefits; working relationship; professional development; and remuneration. | Low          |
| Fang <i>et al.</i> , 2014 | 2012.07-08   | Quantitative study | Hubei        | Rural | Village Clinic          | To analyzes the factors that influence the turnover intention of village doctors by investigating village clinic workers in rural areas, particularly in Xiangyang City, Hubei Province. | Village doctors were most dissatisfied with my pay and the amount of work I do, the chances for advancement on this job, and the work conditions. Highlight the influence of job satisfaction on turnover intention of village doctors | Income satisfaction, the way organization policies are put into practice, my pay and the amount of work I do, the chances for advancement on this job and the work conditions were significantly related to the turnover intention of village doctors.                                                                | Low          |

1  
2  
3  
4  
5  
6  
7  
8  
9  
10  
11  
12  
13  
14  
15  
16  
17  
18  
19  
20  
21  
22  
23  
24  
25  
26  
27  
28  
29  
30  
31  
32  
33  
34  
35  
36  
37  
38  
39  
40  
41  
42  
43  
44  
45  
46

| Study [Citation]          | Study period | Study design      | Province         | Area  | Institution            | Objective                                                                                                                                                         | Key motivation conclusions                                                                                                                                                                                                                                                                                                                                                                                                                                                                                                                    | Influencing factors                                                                                                                                                                                                             | Risk of bias |
|---------------------------|--------------|-------------------|------------------|-------|------------------------|-------------------------------------------------------------------------------------------------------------------------------------------------------------------|-----------------------------------------------------------------------------------------------------------------------------------------------------------------------------------------------------------------------------------------------------------------------------------------------------------------------------------------------------------------------------------------------------------------------------------------------------------------------------------------------------------------------------------------------|---------------------------------------------------------------------------------------------------------------------------------------------------------------------------------------------------------------------------------|--------------|
| Zhou <i>et al.</i> , 2014 | 2013.1-3     | Qualitative Study | Zhejiang, Yunnan | Rural | Township Health Centre | To explore the impacts of these reforms on health workers and service users at township level, which has been the major target of the first phase of the reforms. | Some elements of the reforms may actually be undermining primary care. While the new health insurance system was popular among service-users, it was criticized for contributing to fast-growing medical costs, and for an imbalance of benefits between outpatient and inpatient services. Salary reform has guaranteed health workers' income, but greatly reduced their incentives. The essential drug list removed perverse incentives to overprescribe, but led to falls in income for health workers, and loss of autonomy for doctors. | The health workers' intention was mostly blamed on the loss of income and incentives and in the larger hospitals, on the essential drug list, and the way it limits clinical autonomy and the provision of specialist services. | Low          |

| Study [Citation]         | Study period | Study design       | Province | Area | Institution                                                              | Objective                                                                                  | Key motivation conclusions                                                                                                                                                                                                                                                                                                                                                                                                                                                                          | Influencing factors                                                                                                                                            | Risk of bias |
|--------------------------|--------------|--------------------|----------|------|--------------------------------------------------------------------------|--------------------------------------------------------------------------------------------|-----------------------------------------------------------------------------------------------------------------------------------------------------------------------------------------------------------------------------------------------------------------------------------------------------------------------------------------------------------------------------------------------------------------------------------------------------------------------------------------------------|----------------------------------------------------------------------------------------------------------------------------------------------------------------|--------------|
| Liu <i>et al.</i> , 2014 | 2009-2010    | Mixed method study | Anhui    | Both | Township Health Centre; Village Clinic; Community Health Centre/ Station | To conduct an initial assessment of the effects of specific parts of the reforms in Anhui. | The reform of primary healthcare institutions in Anhui has improved the personnel structures surrounding frontline healthcare workers, increased their incomes, improved work efficiency, and changed the compensation patterns of primary healthcare institutions, improved hardware, reduced drug prices, and, to some extent, improved the diagnosis and treatment structure. However, the reforms have not radically changed the behavior of medical workers or the visit patterns of patients. | Two problems emerged from the reforms. First, the enthusiasm of medical staff decreased, and second, the supply of drugs could not adequately meet the demand. | Moderate     |

1  
2  
3  
4  
5  
6  
7  
8  
9  
10  
11  
12  
13  
14  
15  
16  
17  
18  
19  
20  
21  
22  
23  
24  
25  
26  
27  
28  
29  
30  
31  
32  
33  
34  
35  
36  
37  
38  
39  
40  
41  
42  
43  
44  
45  
46

| Study [Citation]         | Study period | Study design       | Province                                                  | Area  | Institution             | Objective                                                                                                                                              | Key motivation conclusions                                                                                                                                                                                                                             | Influencing factors                                                                                                                                                                                                                                                                      | Risk of bias |
|--------------------------|--------------|--------------------|-----------------------------------------------------------|-------|-------------------------|--------------------------------------------------------------------------------------------------------------------------------------------------------|--------------------------------------------------------------------------------------------------------------------------------------------------------------------------------------------------------------------------------------------------------|------------------------------------------------------------------------------------------------------------------------------------------------------------------------------------------------------------------------------------------------------------------------------------------|--------------|
| Luo <i>et al.</i> , 2014 | maybe 2012   | Quantitative study | Hubei ,<br>Guizhou,<br>Hebei ,<br>Guangdong ,<br>Zhejiang | Urban | Community Health Centre | To analyze and determine the main related factors that influence work passion of CHS workers by investigating CHS workers from five Chinese provinces. | Low passion for current work.<br>Workers were most dissatisfied with the balance between remuneration and workload, job promotion opportunities and most dissatisfied with the balance between remuneration and workload, job promotion opportunities. | The related factors that influence CHS workers' work passion are socio-demographic factors such as age, and years of employment, and other work-related factors such as learning and training opportunities, compensation packages, work stress, and personal development opportunities. | Moderate     |

| Study [Citation]          | Study period   | Study design       | Province | Area  | Institution             | Objective                                                                                                                                                                                                                                   | Key motivation conclusions                                                                                                                                                                                | Influencing factors                                                                                                                                                                                                                                                                                                                                                                      | Risk of bias |
|---------------------------|----------------|--------------------|----------|-------|-------------------------|---------------------------------------------------------------------------------------------------------------------------------------------------------------------------------------------------------------------------------------------|-----------------------------------------------------------------------------------------------------------------------------------------------------------------------------------------------------------|------------------------------------------------------------------------------------------------------------------------------------------------------------------------------------------------------------------------------------------------------------------------------------------------------------------------------------------------------------------------------------------|--------------|
| Ding <i>et al.</i> , 2013 | 2009 v.s. 2012 | Quantitative study | Anhui    | Urban | Community Health Centre | To compare the job satisfaction (JS) of community health workers (CHWs) before and after the local comprehensive medical care reform (LCMR) in Anhui Province to provide evidence for improving the LCMR policy to increase the JS of CHWs. | After two years' implementation of the LCMR, CHWs' total JS have a small improvement. CHWs have lower satisfaction in the dimensions of pay, promotion and benefits dimensions before and after the LCMR. | The average scores of total JS and satisfaction with pay, contingent rewards, operating procedures and communication in the effect evaluation survey were statistically significantly higher than those of the baseline survey. The average score of satisfaction with promotion in the effect evaluation survey was statistically significantly lower than that in the baseline survey. | Low          |

1  
2  
3  
4  
5  
6  
7  
8  
9  
10  
11  
12  
13  
14  
15  
16  
17  
18  
19  
20  
21  
22  
23  
24  
25  
26  
27  
28  
29  
30  
31  
32  
33  
34  
35  
36  
37  
38  
39  
40  
41  
42  
43  
44  
45  
46

| Study [Citation]          | Study period | Study design       | Province                                       | Area  | Institution                                                              | Objective                                                                                                                                                                                                     | Key motivation conclusions                                                                                                                                                                                                                     | Influencing factors                                                                                                                                                                                                                                                                                                  | Risk of bias |
|---------------------------|--------------|--------------------|------------------------------------------------|-------|--------------------------------------------------------------------------|---------------------------------------------------------------------------------------------------------------------------------------------------------------------------------------------------------------|------------------------------------------------------------------------------------------------------------------------------------------------------------------------------------------------------------------------------------------------|----------------------------------------------------------------------------------------------------------------------------------------------------------------------------------------------------------------------------------------------------------------------------------------------------------------------|--------------|
| Hung <i>et al.</i> , 2013 | 2011         | Quantitative study | Jilin, Shandong, Anhui, Chongqing, Ningxia     | Both  | Township Health Centre; Village Clinic; Community Health Centre/ Station | To provide an overview of major performance motivating factors for primary care providers (PCPs) in China and examine associations between these factors and individual and practice setting characteristics. | There were greater needs for improvement in rural than urban settings, especially in living environment. Types of PCPs were associated with needs for improvement in different factors. There were more needs from nurses and village doctors. | The most important motivating factors for PCPs to improve performance were professional development, training opportunities, living environment, benefits, working conditions and income.                                                                                                                            | Low          |
| Sun <i>et al.</i> , 2013  | Maybe 2012   | Quantitative study | Zhejiang, Guangdong, Guizhou, Hebei, and Hubei | Urban | Community Health Centre                                                  | To ascertain the key factors that influence the CHS worker turnover intention to increase their work satisfaction and stability.                                                                              | 38.7 % community health workers intended to quit. CHS workers were less satisfied with the balance between payment and work quantity, promotion opportunity, and working conditions.                                                           | The influencing factors that result in turnover intention are socio-demographic factors such as age, post of duty, professional title, and working seniority, and other work-related factors such as pay packets, learning and training opportunities, promotion and personal development space, and working stress. |              |

| Study [Citation]          | Study period | Study design       | Province       | Area  | Institution                            | Objective                                                                                                                              | Key motivation conclusions                                                                                                                                                                                                                                                                                                                                                                                  | Influencing factors                                                                                                                                                                                                                                                                                                                                                                | Risk of bias |
|---------------------------|--------------|--------------------|----------------|-------|----------------------------------------|----------------------------------------------------------------------------------------------------------------------------------------|-------------------------------------------------------------------------------------------------------------------------------------------------------------------------------------------------------------------------------------------------------------------------------------------------------------------------------------------------------------------------------------------------------------|------------------------------------------------------------------------------------------------------------------------------------------------------------------------------------------------------------------------------------------------------------------------------------------------------------------------------------------------------------------------------------|--------------|
| Ding <i>et al.</i> , 2013 | 2011.3-6     | Quantitative study | Hubei, Jiangxi | Rural | Township Health Centre; Village Clinic | To improve the early detection of epidemics in rural China by integrating syndromic surveillance with the existing case report system. | Village doctors prioritize medical services but they do their best to manage their time to include public health services. The willingness of township health centre directors and village doctors to provide public health services has improved since the introduction of the package and a minimum subsidy, but village doctors do not find the subsidy to be sufficient remuneration for their efforts. | Factors to consider in future activities to improve the quality and extent of public health services provided by village doctors include actual and potential sources of village doctor income (i.e. medical services, social pension and other government support), the relationship between village clinics and township health centres and the amount of public health subsidy. | Moderate     |



1  
2  
3  
4  
5  
6  
7  
8  
9  
10  
11  
12  
13  
14  
15  
16  
17  
18  
19  
20  
21  
22  
23  
24  
25  
26  
27  
28  
29  
30  
31  
32  
33  
34  
35  
36  
37  
38  
39  
40  
41  
42  
43  
44  
45  
46

| Study [Citation]         | Study period    | Study design       | Province                                                                             | Area  | Institution                                                             | Objective                                                                                                                                                                         | Key motivation conclusions                                                                                                                                                                                                                                            | Influencing factors                                                                                                                                                                                                                                                | Risk of bias |
|--------------------------|-----------------|--------------------|--------------------------------------------------------------------------------------|-------|-------------------------------------------------------------------------|-----------------------------------------------------------------------------------------------------------------------------------------------------------------------------------|-----------------------------------------------------------------------------------------------------------------------------------------------------------------------------------------------------------------------------------------------------------------------|--------------------------------------------------------------------------------------------------------------------------------------------------------------------------------------------------------------------------------------------------------------------|--------------|
| Li <i>et al.</i> , 2013  | 2009.12-2010.12 | Quantitative study | Beijing, Jiangsu, Zhejiang, Hainan, Guangxi, Shanxi, Jiangxi, Guizhou, Yunnan, Gansu | Rural | Township Health Centre; Village Clinic                                  | To analyze the educational status and future training needs of China's rural doctors and provide a basis to improve their future training.                                        | Rural health professionals in China who have relatively low healthcare education should be focused on. Rural doctors the training status and needs of China's rural doctors are still disjointed in terms of the training time, training method and training content. | Rural doctors wanted to extend the training time, preferred to practice-focused training (on-site guidance from senior doctors, clinical further education), and had greater desire for clinical skills, preventive healthcare and medication knowledge education. | Low          |
| Shi <i>et al.</i> , 2014 | 2011            | Quantitative study | 5 provinces representing Eastern, Central, and Western China                         | Both  | Township Health Centre; Village Clinic; Community Health Centre/Station | To provide a snapshot of the current state of primary care workforce (PCW) serving China's grassroots communities and examine the factors associated with their job satisfaction. | Low job satisfaction PCW are least satisfied with their income level (only 8.6% are either satisfied or very satisfied), benefits (12.8%), and professional development (19.5%).                                                                                      | Lower income and higher workload are the two major contributing factors toward job dissatisfaction.                                                                                                                                                                | Moderate     |

| Study [Citation]          | Study period     | Study design       | Province | Area  | Institution             | Objective                                                                                                                                                                                        | Key motivation conclusions                                                                                                                         | Influencing factors                                                                                                                                                                                                                                                                                                   | Risk of bias |
|---------------------------|------------------|--------------------|----------|-------|-------------------------|--------------------------------------------------------------------------------------------------------------------------------------------------------------------------------------------------|----------------------------------------------------------------------------------------------------------------------------------------------------|-----------------------------------------------------------------------------------------------------------------------------------------------------------------------------------------------------------------------------------------------------------------------------------------------------------------------|--------------|
| Ge <i>et al.</i> , 2011   | 2009.12 -2010.2  | Quantitative study | Liaoning | Urban | Community Health Centre | To clarify the level of job satisfaction of Chinese community health workers between a metropolitan (Shenyang) and a small city (Benxi) in Liaoning province and explore its associated factors. | A moderate level of job satisfactions. Community health workers in a metropolitan had lower job satisfaction as compared to those in a small city. | Three significant predictors of intrinsic and extrinsic job satisfactions were the two dimensions (social support and decision latitude) of stress and cynicism of burnout.                                                                                                                                           | Low          |
| Zhao <i>et al.</i> , 2011 | 2008.12 - 2009.2 | Qualitative study  | Beijing  | Urban | Community Health Centre | To understand the advancements in and barriers to the implementation of measures to improve basic public health services in an urban Chinese community.                                          | The number of practitioners and their low levels of skill were insufficient to provide adequate services for community residents.                  | Due to the broad scope of basic public health services and limited financial incentives, providers felt that they were under great stress and often complained that community members for whom they were responsible did not trust them as these clinicians had lower levels of knowledge and skill than specialists. | Moderate     |

1  
2  
3  
4  
5  
6  
7  
8  
9  
10  
11  
12  
13  
14  
15  
16  
17  
18  
19  
20  
21  
22  
23  
24  
25  
26  
27  
28  
29  
30  
31  
32  
33  
34  
35  
36  
37  
38  
39  
40  
41  
42  
43  
44  
45  
46

| Study [Citation]         | Study period | Study design       | Province        | Area  | Institution            | Objective                                                                                                                                                                                                                | Key motivation conclusions                                                                                                                                                                                 | Influencing factors                                                                                                                                                                             | Risk of bias |
|--------------------------|--------------|--------------------|-----------------|-------|------------------------|--------------------------------------------------------------------------------------------------------------------------------------------------------------------------------------------------------------------------|------------------------------------------------------------------------------------------------------------------------------------------------------------------------------------------------------------|-------------------------------------------------------------------------------------------------------------------------------------------------------------------------------------------------|--------------|
| Liu <i>et al.</i> , 2010 | 2007         | Quantitative study | Anhui, Xinjiang | Rural | Township Health Centre | To measure job satisfaction level of THC employees in poor rural China and to identify relevant features in order to provide policy advice on human resource development of health service institutions in poor regions. | Moderate job satisfactions in poor areas. Job satisfaction scores reflecting job significance, job competency and team work were highest, while work conditions and atmosphere and job reward were lowest. | Township health centers employees are more satisfied with the work significance and cooperation with colleagues, while less satisfied with work conditions, reward and promotion opportunities. | Low          |

For peer review only

| Study [Citation]              | Study period | Study design      | Province | Area  | Institution                            | Objective                                                                                                                                                                                         | Key motivation conclusions                                                                                                                                                                  | Influencing factors                                                                                                                                                                                                                                                                  | Risk of bias |
|-------------------------------|--------------|-------------------|----------|-------|----------------------------------------|---------------------------------------------------------------------------------------------------------------------------------------------------------------------------------------------------|---------------------------------------------------------------------------------------------------------------------------------------------------------------------------------------------|--------------------------------------------------------------------------------------------------------------------------------------------------------------------------------------------------------------------------------------------------------------------------------------|--------------|
| Zhou <i>et al.</i> , 2015 Feb | 2013         | Qualitative Study | Jiangxi  | Rural | Township Health Centre; Village Clinic | To explore the perspectives of health providers on the contract service policy, and investigate the demand side's attitude toward the public health services delivered under the contract policy. | The contract service actually promoted the supply side to provide more public health services to the villagers and contracted patients felt satisfied with the doctor-patient relationship. | Most health providers complained about the heavy workload, insufficient remuneration, staff shortage, lack of official identity and ineffective performance appraisal, in addition to contempt from some villagers and supervisors after the implementation of the contract service. | Moderate     |

1  
2  
3  
4  
5  
6  
7  
8  
9  
10  
11  
12  
13  
14  
15  
16  
17  
18  
19  
20  
21  
22  
23  
24  
25  
26  
27  
28  
29  
30  
31  
32  
33  
34  
35  
36  
37  
38  
39  
40  
41  
42  
43  
44  
45  
46

| Study [Citation]          | Study period | Study design       | Province | Area  | Institution                            | Objective                                                                                                            | Key motivation conclusions                                                                                                                                                                                                | Influencing factors                                                                                                                                                                                                                                                                                                   | Risk of bias |
|---------------------------|--------------|--------------------|----------|-------|----------------------------------------|----------------------------------------------------------------------------------------------------------------------|---------------------------------------------------------------------------------------------------------------------------------------------------------------------------------------------------------------------------|-----------------------------------------------------------------------------------------------------------------------------------------------------------------------------------------------------------------------------------------------------------------------------------------------------------------------|--------------|
| Chen <i>et al.</i> , 2015 | 2012.5-7     | Mixed method study | Jiangsu  | Rural | Township Health Centre; Village Clinic | To reveal the challenges of village doctors' survival and training in economically developed areas in eastern China. | The main challenges in Changzhou include an insufficient amount of village doctors, difficulties in obtaining professional qualification for village doctors, low salaries and benefits, and difficulties in recruitment. | The gap between expected and actual income is the primary factor affecting the attractiveness of a career as a village doctor. Changes to training have influenced the stability of village doctor teams. Declining attachment of young people to their hometown village has contributed to recruitment difficulties. | Moderate     |
| Wang <i>et al.</i> , 2013 | 2009.9-11    | Quantitative study | Beijing  | Rural | Village Clinic                         | To explore the reasons for the poor recruitment and to propose possible strategies to improve the situation.         | Rural doctors were generally older than average and considered the training strategy to be inadequate in in China.                                                                                                        | In general, the initiatives identified by rural doctors as being of most value in the recruitment of doctors were those targeting retirement pension and income.                                                                                                                                                      | Moderate     |

| Study [Citation]        | Study period | Study design       | Province                   | Area  | Institution    | Objective                                                                                                                       | Key motivation conclusions                                                                                                                                                                             | Influencing factors                                                                                                                                                                                                                                                                                                                                                                                | Risk of bias |
|-------------------------|--------------|--------------------|----------------------------|-------|----------------|---------------------------------------------------------------------------------------------------------------------------------|--------------------------------------------------------------------------------------------------------------------------------------------------------------------------------------------------------|----------------------------------------------------------------------------------------------------------------------------------------------------------------------------------------------------------------------------------------------------------------------------------------------------------------------------------------------------------------------------------------------------|--------------|
| Li <i>et al.</i> , 2017 | 2014-4       | Mixed method study | Shandong, Guangxi, Shaanxi | Rural | Village Clinic | To describe village doctors' job satisfaction under the context of health sector reform and investigate the associated factors. | Low job satisfaction. Village doctors who earned the top level of monthly income felt more satisfied, while on the county level, those who lived in counties with the highest GDP felt less satisfied. | From interviews, most workers believed that age, income, and integrated management had a positive influence on the job satisfaction, while pension plan and basic public health care policies exhibited negative effects. Also, the increasing in availability of healthcare and health resources along with local economic development had negative effects on village doctors' job satisfaction. | Low          |

1  
2  
3  
4  
5  
6  
7  
8  
9  
10  
11  
12  
13  
14  
15  
16  
17  
18  
19  
20  
21  
22  
23  
24  
25  
26  
27  
28  
29  
30  
31  
32  
33  
34  
35  
36  
37  
38  
39  
40  
41  
42  
43  
44  
45  
46

| Study [Citation]           | Study period    | Study design       | Province                           | Area  | Institution             | Objective                                                                                                                                                          | Key motivation conclusions                                                                                                                                                                                   | Influencing factors                                                                                                                                                                                                                     | Risk of bias |
|----------------------------|-----------------|--------------------|------------------------------------|-------|-------------------------|--------------------------------------------------------------------------------------------------------------------------------------------------------------------|--------------------------------------------------------------------------------------------------------------------------------------------------------------------------------------------------------------|-----------------------------------------------------------------------------------------------------------------------------------------------------------------------------------------------------------------------------------------|--------------|
| Zhang <i>et al.</i> , 2017 | 2013            | Quantitative study | Shanghai, Shaanxi, Shandong, Anhui | Urban | Community Health Centre | To examine the mediation effect of job satisfaction on the relationship between person-organization fit (P-O fit) and turnover intention based on data from China. | The effect of P-O fit on turnover intention was partially mediated through job satisfaction.                                                                                                                 | P-O fit was directly related to job satisfaction and inversely related to turnover intention.                                                                                                                                           | Low          |
| Li <i>et al.</i> , 2014    | 2013.3.1 -10.31 | Quantitative study | Heilongjiang                       | Urban | Community Health Centre | To examine levels of work stress and motivation and their contribution to job satisfaction among community health workers in Heilongjiang Province, China.         | Levels of overall motivation perception and scores on the career development, responsibility and recognition motivation subscales were higher in satisfied respondents relative to dissatisfied respondents. | The main determinants of job satisfaction were occupation; age; title; income; the career development, and wages and benefits subscales of work stress; and the recognition, responsibility and financial subscales of work motivation. | Low          |

| Study [Citation]          | Study period | Study design       | Province                 | Area  | Institution                                     | Objective                                                                                                              | Key motivation conclusions                                                                                                                                                                                                                      | Influencing factors                                                                                                            | Risk of bias |
|---------------------------|--------------|--------------------|--------------------------|-------|-------------------------------------------------|------------------------------------------------------------------------------------------------------------------------|-------------------------------------------------------------------------------------------------------------------------------------------------------------------------------------------------------------------------------------------------|--------------------------------------------------------------------------------------------------------------------------------|--------------|
| Meng <i>et al.</i> , 2009 | 2006         | Qualitative Study  | 10 provinces             | Both  | Township Health Centre; Community Health Centre | To analyze the mobility of health workers in township and community health centres.                                    | Increased rate of workers leaving township and community health centres between 2000 and 2005, with the majority of the mobile health workers moving to higher-level health facilities; very few moving to other rural township health centres. | The main reasons for leaving were low salaries, limited opportunities for professional development and poor living conditions. | Moderate     |
| Wang <i>et al.</i> , 2017 | 2013         | Quantitative study | Shandong, Anhui, Shaanxi | Rural | Township Health Centre                          | To investigate the association between the latent clusters and health-care staff's personal and professional features. | The minority of health-care staff belong to the "satisfied class". Three among four subgroups are not satisfied with income, benefit, training, and career development.                                                                         | Low job satisfaction was associated with specialty, training opportunity, and income inequality.                               | Low          |



1  
2  
3  
4  
5  
6  
7  
8  
9  
10  
11  
12  
13  
14  
15  
16  
17  
18  
19  
20  
21  
22  
23  
24  
25  
26  
27  
28  
29  
30  
31  
32  
33  
34  
35  
36  
37  
38  
39  
40  
41  
42  
43  
44  
45  
46

| <b>Study [Citation]</b> | <b>Study period</b> | <b>Study design</b> | <b>Province</b> | <b>Area</b> | <b>Institution</b>     | <b>Objective</b>                                                                      | <b>Key motivation conclusions</b>                                                                                                                                                                                                                             | <b>Influencing factors</b>                                                                                                                  | <b>Risk of bias</b> |
|-------------------------|---------------------|---------------------|-----------------|-------------|------------------------|---------------------------------------------------------------------------------------|---------------------------------------------------------------------------------------------------------------------------------------------------------------------------------------------------------------------------------------------------------------|---------------------------------------------------------------------------------------------------------------------------------------------|---------------------|
| Chen et al., 2017       | After 2009          | Qualitative study   | Guangxi         | Rural       | Township Health Centre | To understand the level of job satisfaction as felt by primary health care providers. | Increasing the incomes and fringe benefits of healthcare workers, improving their work conditions, and providing training and continuing education opportunities would help rural clinics retain doctors and eliminate the current unsatisfactory conditions. | The main concerns related to job satisfaction included working conditions, financial rewards, and the doctor’s relationships with patients. | Moderate            |

For peer review only

| Study [Citation] | Study period | Study design       | Province  | Area | Institution                                                              | Objective                                                                                                                                                                                                                                       | Key motivation conclusions                                                                                                                                                                                                                                  | Influencing factors                                                                                                                                                                                                                                                                    | Risk of bias |
|------------------|--------------|--------------------|-----------|------|--------------------------------------------------------------------------|-------------------------------------------------------------------------------------------------------------------------------------------------------------------------------------------------------------------------------------------------|-------------------------------------------------------------------------------------------------------------------------------------------------------------------------------------------------------------------------------------------------------------|----------------------------------------------------------------------------------------------------------------------------------------------------------------------------------------------------------------------------------------------------------------------------------------|--------------|
| Lu et al., 2016  | 2013         | Quantitative study | Guangdong | Both | Township Health Centre; Village Clinic; Community Health Centre/ Station | To explore job satisfaction among healthcare staff in Guangdong following the health system reforms in 2009, and to investigate the association between job satisfaction and work stress, work–family conflict and doctor–patient relationship. | The overall job satisfaction exceeded slightly dissatisfied and approached slightly satisfied. Measures to enhance job satisfaction include the reduction of workload, increase of welfare, maintaining moderate stress and balancing work–family conflict. | The sociodemographic variables including occupation, educational background, professional status, years of service, annual income and night shift, work stress, work–family conflict and doctor–patient relationship frequency significantly influenced the level of job satisfaction. | Low          |

1  
2  
3  
4  
5  
6  
7  
8  
9  
10  
11  
12  
13  
14  
15  
16  
17  
18  
19  
20  
21  
22  
23  
24  
25  
26  
27  
28  
29  
30  
31  
32  
33  
34  
35  
36  
37  
38  
39  
40  
41  
42  
43  
44  
45  
46

| <b>Study [Citation]</b> | <b>Study period</b> | <b>Study design</b> | <b>Province</b>                            | <b>Area</b> | <b>Institution</b>                              | <b>Objective</b>                                                                                                                                                                 | <b>Key motivation conclusions</b>                                                                                                                                                                                                                   | <b>Influencing factors</b>                                                                                                                                                              | <b>Risk of bias</b> |
|-------------------------|---------------------|---------------------|--------------------------------------------|-------------|-------------------------------------------------|----------------------------------------------------------------------------------------------------------------------------------------------------------------------------------|-----------------------------------------------------------------------------------------------------------------------------------------------------------------------------------------------------------------------------------------------------|-----------------------------------------------------------------------------------------------------------------------------------------------------------------------------------------|---------------------|
| Song et al., 2015       | 2011                | Quantitative study  | Jilin, Shandong, Anhui, Chongqing, Shaanxi | Both        | Township Health Centre; Community Health Centre | To find out which job attributes affect Chinese primary care providers' choice of job and whether there are any differences in these job preferences between doctors and nurses. | Policymakers need to improve primary care providers' income, benefits and working conditions to fulfil their basic needs, invest in infrastructure and strengthen training programmes in order to raise the community's confidence in the services. | Though income was important, Chinese primary care providers also had strong preferences for sufficient welfare benefits, sufficient essential equipment and respect from the community. | Low                 |
| Mo et al., 2017         | 2014                | Quantitative study  | Guangxi                                    | Rural       | Township Health Centre                          | To explore the current health training status of nurses working in rural Chinese township health centers and to ascertain their perceived needs.                                 | A decentralized degree-linked training program in which medical universities and city hospitals collaborate would be an appropriate mode of delivery.                                                                                               | Mismatch between current health training initiatives and desired programs in terms of training setting, content, and delivery mode                                                      | Moderate            |

| Study [Citation]   | Study period | Study design       | Province                             | Area  | Institution                      | Objective                                                                                                                   | Key motivation conclusions                                                                                                                              | Influencing factors                                                                                                                                                                                                                 | Risk of bias |
|--------------------|--------------|--------------------|--------------------------------------|-------|----------------------------------|-----------------------------------------------------------------------------------------------------------------------------|---------------------------------------------------------------------------------------------------------------------------------------------------------|-------------------------------------------------------------------------------------------------------------------------------------------------------------------------------------------------------------------------------------|--------------|
| Zhang et al., 2017 | 2013         | Qualitative Study  | Shandong                             | Urban | Community Health Centre/ Station | To analyze how health reform of CHS led to changing job features for primary health providers.                              | The new model of primary health care significantly affected the nature of primary health work and triggered a range of PHC providers' coping processes. | Health workers perceived their job as less intensive than hospital medical work but often more trivial, characterized by heavy workload, blurred job description, unsatisfactory income, and a lack of professional development.    | Moderate     |
| Zhang et al., 2017 | 2014         | Quantitative study | Zhejiang, Jiangxi, Shaanxi, Xinjiang | Urban | Community Health Centre          | To investigate the perceptions of primary care workers about the impacts of the national essential medicines policy (NEMP). | The NEMP has significant impacts (as perceived by the health workers) on health services delivery in primary care settings.                             | The impacts of the NEMP vary by region, professional practice and the income level of health workers. It is important to maintain support from physicians through income subsidies (to compensate for potential loss) and training. | Moderate     |

1  
2  
3  
4  
5  
6  
7  
8  
9  
10  
11  
12  
13  
14  
15  
16  
17  
18  
19  
20  
21  
22  
23  
24  
25  
26  
27  
28  
29  
30  
31  
32  
33  
34  
35  
36  
37  
38  
39  
40  
41  
42  
43  
44  
45  
46

| Study [Citation]  | Study period | Study design       | Province                          | Area  | Institution    | Objective                                                                                                                                           | Key motivation conclusions                                                                                                                                                              | Influencing factors                                                                                                                                                                                                                                                                                 | Risk of bias |
|-------------------|--------------|--------------------|-----------------------------------|-------|----------------|-----------------------------------------------------------------------------------------------------------------------------------------------------|-----------------------------------------------------------------------------------------------------------------------------------------------------------------------------------------|-----------------------------------------------------------------------------------------------------------------------------------------------------------------------------------------------------------------------------------------------------------------------------------------------------|--------------|
| Feng et al., 2017 | 2014         | Quantitative study | Qinghai, Inner Mongolia, Xinjiang | Rural | Village Clinic | To examine the satisfaction of village doctors with the Township and Village Health Services Integration Management (TVHSIM).                       | Low satisfaction with the TVHSIM. A well-rounded social insurance model for village doctors is urgently needed and enhancing essential medical training should be carefully considered. | Social insurance, essential medical knowledge, year of practice significantly influenced satisfaction of village doctors on human resources management, drug and medical device management, and financing management.                                                                               | Low          |
| Li et al., 2016   | 2014         | Quantitative study | Shandong, Guangxi, Shaanxi        | Rural | Village Clinic | To identify factors associated with village doctors' basic public health services provision and to formulate targeted interventions in rural China. | There is considerable room for improvement regarding the factors associated with village doctors' basic public health services provision.                                               | Increasing public health care subsidies received by individual village doctors, availability and attendance of training opportunities, and integrated management and NCMS contracting of village clinics are important factors in increasing basic public health services provision in rural areas. | Low          |

| Study [Citation]  | Study period | Study design       | Province | Area  | Institution                | Objective                                                                                                                                  | Key motivation conclusions                                                                                                                 | Influencing factors                                                                                                                                                                                                                         | Risk of bias |
|-------------------|--------------|--------------------|----------|-------|----------------------------|--------------------------------------------------------------------------------------------------------------------------------------------|--------------------------------------------------------------------------------------------------------------------------------------------|---------------------------------------------------------------------------------------------------------------------------------------------------------------------------------------------------------------------------------------------|--------------|
| Song et al., 2016 | 2011         | Quantitative study | Ningxia  | Both  | Primary healthcare centers | To examine current understanding and opinions of China's National Essential Medicine System (NEMS) of primary care providers and patients. | High level of satisfaction towards NEMS among primary care providers, which is a reflection of the improvements in the health care system. | Overall there was a link between knowledge about NEMS and satisfaction with the program: the providers with greater knowledge of NEMS, reported higher satisfaction.                                                                        | Moderate     |
| Li et al., 2015   | 2012         | Mixed method study | Jiangsu  | Rural | Village Clinic             | To identify specific factors of and potential solutions to the shortage in village doctors.                                                | The shortage in village doctors presents a major obstacle toward the realization of China's policy of public health service equalization.  | Many factors associated with the shortage of village doctors were payment related including low salaries and bonuses, heavy workload, few opportunities for continuing education, unattractive pension plans and poor working environments. | Moderate     |

### 3. Overall job satisfaction score among primary care workers

| Study [Citation]          | Study period | Province/city                              | Area  | Sample size | Measurement of scales | Measurement of overall satisfaction | Job satisfaction score | Standard deviation |
|---------------------------|--------------|--------------------------------------------|-------|-------------|-----------------------|-------------------------------------|------------------------|--------------------|
| Liu <i>et al.</i> , 2010  | 2007         | Anhui                                      | rural | 77          | Likert 5 point        | Sum of dimension                    | 3.76*                  | -                  |
| Liu <i>et al.</i> , 2010  | 2007         | Xinjiang                                   | rural | 95          | Likert 5 point        | Sum of dimension                    | 4.49*                  | -                  |
| Ding <i>et al.</i> , 2013 | 2009         | Anhui                                      | urban | 765         | Likert 5 point        | Sum of dimension                    | 3.06                   | 0.497              |
| Ge <i>et al.</i> , 2011   | 2009-2010    | Shenyang City                              | urban | 1010        | Likert 5 point        | Sum of dimension                    | 3.36*                  | -                  |
| Ge <i>et al.</i> , 2011   | 2009-2010    | Benxi City                                 | urban | 684         | Likert 5 point        | Sum of dimension                    | 3.50*                  | -                  |
| Shi <i>et al.</i> , 2014  | 2011         | 5 provinces                                | both  | 863         | Likert 5 point        | Sum of dimension                    | 3.43                   | 0.77               |
| Hung <i>et al.</i> , 2013 | 2011         | Jilin, Anhui, Shandong, Chongqing, Ningxia | both  | 823         | Likert 5 point        | Sum of dimension                    | 3.39                   | -                  |
| Wu <i>et al.</i> , 2014   | 2012         | Zhejiang                                   | both  | 111         | Likert 5 point        | Sum of dimension                    | 3.23                   | 0.06               |
| Li <i>et al.</i> , 2014   | 2012         | Heilongjiang                               | urban | 448         | Likert 5 point        | Sum of dimension                    | 3.69                   | -                  |
| Ding <i>et al.</i> , 2013 | 2012         | Anhui                                      | urban | 495         | Likert 5 point        | Sum of dimension                    | 3.13                   | 0.643              |

|    |                                                                                                                                               |      |                                                  |       |      |                |                  |       |      |
|----|-----------------------------------------------------------------------------------------------------------------------------------------------|------|--------------------------------------------------|-------|------|----------------|------------------|-------|------|
| 1  |                                                                                                                                               |      |                                                  |       |      |                |                  |       |      |
| 2  |                                                                                                                                               |      |                                                  |       |      |                |                  |       |      |
| 3  |                                                                                                                                               |      |                                                  |       |      |                |                  |       |      |
| 4  |                                                                                                                                               |      |                                                  |       |      |                |                  |       |      |
| 5  | Luo <i>et al.</i> , 2014                                                                                                                      | 2012 | Hubei, Hebei,<br>Guizhou, Guangdong,<br>Zhejiang | urban | 3220 | Likert 5 point | Sum of dimension | 3.37  | -    |
| 6  |                                                                                                                                               |      |                                                  |       |      |                |                  |       |      |
| 7  |                                                                                                                                               |      |                                                  |       |      |                |                  |       |      |
| 8  | Sun <i>et al.</i> , 2013                                                                                                                      | 2013 | Zhejiang, Guangdong,<br>Guizhou, Hebei,<br>Hubei | urban | 3212 | Likert 5 point | Sum of dimension | 3.44  | -    |
| 9  |                                                                                                                                               |      |                                                  |       |      |                |                  |       |      |
| 10 |                                                                                                                                               |      |                                                  |       |      |                |                  |       |      |
| 11 |                                                                                                                                               |      |                                                  |       |      |                |                  |       |      |
| 12 |                                                                                                                                               |      |                                                  |       |      |                |                  |       |      |
| 13 | Fang <i>et al.</i> , 2014                                                                                                                     | 2012 | Hubei                                            | rural | 1889 | Likert 5 point | Sum of dimension | 2.57  | -    |
| 14 |                                                                                                                                               |      |                                                  |       |      |                |                  |       |      |
| 15 | Zhang <i>et al.</i> , 2017                                                                                                                    | 2013 | Shanghai, Shaanxi,<br>Shandong,<br>Anhui         | urban | 656  | Likert 5 point | Standalone item  | 3.55  | 0.74 |
| 16 |                                                                                                                                               |      |                                                  |       |      |                |                  |       |      |
| 17 |                                                                                                                                               |      |                                                  |       |      |                |                  |       |      |
| 18 |                                                                                                                                               |      |                                                  |       |      |                |                  |       |      |
| 19 | Li <i>et al.</i> , 2014                                                                                                                       | 2013 | Heilongjiang                                     | urban | 930  | 4 point        | Sum of dimension | 3.11  | 0.68 |
| 20 |                                                                                                                                               |      |                                                  |       |      |                |                  |       |      |
| 21 | Zhang <i>et al.</i> , 2016                                                                                                                    | 2014 | Jiangxi                                          | rural | 935  | Likert 5 point | Standalone item  | 1.82  | 0.63 |
| 22 |                                                                                                                                               |      |                                                  |       |      |                |                  |       |      |
| 23 | Li <i>et al.</i> , 2017                                                                                                                       | 2014 | Shandong,<br>Guangxi, Shaanxi                    | rural | 1221 | 4 point        | Standalone item  | 2.43* | -    |
| 24 |                                                                                                                                               |      |                                                  |       |      |                |                  |       |      |
| 25 |                                                                                                                                               |      |                                                  |       |      |                |                  |       |      |
| 26 | Lu <i>et al.</i> , 2016                                                                                                                       | 2013 | Guangdong                                        | both  | 5845 | Likert 6 point | Sum of dimension | 3.99  | 0.99 |
| 27 |                                                                                                                                               |      |                                                  |       |      |                |                  |       |      |
| 28 |                                                                                                                                               |      |                                                  |       |      |                |                  |       |      |
| 29 | Wang <i>et al.</i> , 2017                                                                                                                     | 2013 | Shandong, Anhui,<br>Shaanxi                      | rural | 603  | Likert 5 point | Sum of dimension | 3.37  | -    |
| 30 |                                                                                                                                               |      |                                                  |       |      |                |                  |       |      |
| 31 |                                                                                                                                               |      |                                                  |       |      |                |                  |       |      |
| 32 |                                                                                                                                               |      |                                                  |       |      |                |                  |       |      |
| 33 |                                                                                                                                               |      |                                                  |       |      |                |                  |       |      |
| 34 | * We converted these scores from the sum of percentage scores into 5-grade score: Overall satisfaction = summed score/maximum total score × 5 |      |                                                  |       |      |                |                  |       |      |
| 35 |                                                                                                                                               |      |                                                  |       |      |                |                  |       |      |
| 36 |                                                                                                                                               |      |                                                  |       |      |                |                  |       |      |
| 37 |                                                                                                                                               |      |                                                  |       |      |                |                  |       |      |
| 38 |                                                                                                                                               |      |                                                  |       |      |                |                  |       |      |
| 39 |                                                                                                                                               |      |                                                  |       |      |                |                  |       |      |
| 40 |                                                                                                                                               |      |                                                  |       |      |                |                  |       |      |
| 41 |                                                                                                                                               |      |                                                  |       |      |                |                  |       |      |
| 42 |                                                                                                                                               |      |                                                  |       |      |                |                  |       |      |
| 43 |                                                                                                                                               |      |                                                  |       |      |                |                  |       |      |
| 44 |                                                                                                                                               |      |                                                  |       |      |                |                  |       |      |
| 45 |                                                                                                                                               |      |                                                  |       |      |                |                  |       |      |
| 46 |                                                                                                                                               |      |                                                  |       |      |                |                  |       |      |



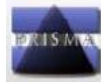

# PRISMA 2009 Checklist

| Section/topic                      | #  | Checklist item                                                                                                                                                                                                                                                                                              | Reported on page # |
|------------------------------------|----|-------------------------------------------------------------------------------------------------------------------------------------------------------------------------------------------------------------------------------------------------------------------------------------------------------------|--------------------|
| <b>TITLE</b>                       |    |                                                                                                                                                                                                                                                                                                             |                    |
| Title                              | 1  | Identify the report as a systematic review, meta-analysis, or both.                                                                                                                                                                                                                                         | 1                  |
| <b>ABSTRACT</b>                    |    |                                                                                                                                                                                                                                                                                                             |                    |
| Structured summary                 | 2  | Provide a structured summary including, as applicable: background; objectives; data sources; study eligibility criteria, participants, and interventions; study appraisal and synthesis methods; results; limitations; conclusions and implications of key findings; systematic review registration number. | 2-3                |
| <b>INTRODUCTION</b>                |    |                                                                                                                                                                                                                                                                                                             |                    |
| Rationale                          | 3  | Describe the rationale for the review in the context of what is already known.                                                                                                                                                                                                                              | 3-4                |
| Objectives                         | 4  | Provide an explicit statement of questions being addressed with reference to participants, interventions, comparisons, outcomes, and study design (PICOS).                                                                                                                                                  | 5                  |
| <b>METHODS</b>                     |    |                                                                                                                                                                                                                                                                                                             |                    |
| Protocol and registration          | 5  | Indicate if a review protocol exists, if and where it can be accessed (e.g., Web address), and, if available, provide registration information including registration number.                                                                                                                               | 5                  |
| Eligibility criteria               | 6  | Specify study characteristics (e.g., PICOS, length of follow-up) and report characteristics (e.g., years considered, language, publication status) used as criteria for eligibility, giving rationale.                                                                                                      | 5                  |
| Information sources                | 7  | Describe all information sources (e.g., databases with dates of coverage, contact with study authors to identify additional studies) in the search and date last searched.                                                                                                                                  | 5                  |
| Search                             | 8  | Present full electronic search strategy for at least one database, including any limits used, such that it could be repeated.                                                                                                                                                                               | 5                  |
| Study selection                    | 9  | State the process for selecting studies (i.e., screening, eligibility, included in systematic review, and, if applicable, included in the meta-analysis).                                                                                                                                                   | 5                  |
| Data collection process            | 10 | Describe method of data extraction from reports (e.g., piloted forms, independently, in duplicate) and any processes for obtaining and confirming data from investigators.                                                                                                                                  | 6                  |
| Data items                         | 11 | List and define all variables for which data were sought (e.g., PICOS, funding sources) and any assumptions and simplifications made.                                                                                                                                                                       | 7                  |
| Risk of bias in individual studies | 12 | Describe methods used for assessing risk of bias of individual studies (including specification of whether this was done at the study or outcome level), and how this information is to be used in any data synthesis.                                                                                      | N/A                |
| Summary measures                   | 13 | State the principal summary measures (e.g., risk ratio, difference in means).                                                                                                                                                                                                                               | 7                  |
| Synthesis of results               | 14 | Describe the methods of handling data and combining results of studies, if done, including measures of consistency (e.g., $I^2$ ) for each meta-analysis.                                                                                                                                                   | 7                  |

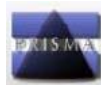

# PRISMA 2009 Checklist

| Section/topic                 | #  | Checklist item                                                                                                                                                                                           | Reported on page #     |
|-------------------------------|----|----------------------------------------------------------------------------------------------------------------------------------------------------------------------------------------------------------|------------------------|
| Risk of bias across studies   | 15 | Specify any assessment of risk of bias that may affect the cumulative evidence (e.g., publication bias, selective reporting within studies).                                                             | N/A                    |
| Additional analyses           | 16 | Describe methods of additional analyses (e.g., sensitivity or subgroup analyses, meta-regression), if done, indicating which were pre-specified.                                                         | N/A                    |
| <b>RESULTS</b>                |    |                                                                                                                                                                                                          |                        |
| Study selection               | 17 | Give numbers of studies screened, assessed for eligibility, and included in the review, with reasons for exclusions at each stage, ideally with a flow diagram.                                          | 7                      |
| Study characteristics         | 18 | For each study, present characteristics for which data were extracted (e.g., study size, PICOS, follow-up period) and provide the citations.                                                             | Supplementary Material |
| Risk of bias within studies   | 19 | Present data on risk of bias of each study and, if available, any outcome level assessment (see item 12).                                                                                                | N/A                    |
| Results of individual studies | 20 | For all outcomes considered (benefits or harms), present, for each study: (a) simple summary data for each intervention group (b) effect estimates and confidence intervals, ideally with a forest plot. | 8-14                   |
| Synthesis of results          | 21 | Present results of each meta-analysis done, including confidence intervals and measures of consistency.                                                                                                  | 14-15                  |
| Risk of bias across studies   | 22 | Present results of any assessment of risk of bias across studies (see Item 15).                                                                                                                          | N/A                    |
| Additional analysis           | 23 | Give results of additional analyses, if done (e.g., sensitivity or subgroup analyses, meta-regression [see Item 16]).                                                                                    | N/A                    |
| <b>DISCUSSION</b>             |    |                                                                                                                                                                                                          |                        |
| Summary of evidence           | 24 | Summarize the main findings including the strength of evidence for each main outcome; consider their relevance to key groups (e.g., healthcare providers, users, and policy makers).                     | 15-19                  |
| Limitations                   | 25 | Discuss limitations at study and outcome level (e.g., risk of bias), and at review-level (e.g., incomplete retrieval of identified research, reporting bias).                                            | 19-20                  |
| Conclusions                   | 26 | Provide a general interpretation of the results in the context of other evidence, and implications for future research.                                                                                  | 20                     |
| <b>FUNDING</b>                |    |                                                                                                                                                                                                          |                        |
| Funding                       | 27 | Describe sources of funding for the systematic review and other support (e.g., supply of data); role of funders for the systematic review.                                                               | 21                     |

From: Moher D, Liberati A, Tetzlaff J, Altman DG, The PRISMA Group (2009). Preferred Reporting Items for Systematic Reviews and Meta-Analyses: The PRISMA Statement. PLoS Med 6(6): e1000097. doi:10.1371/journal.pmed1000097

For more information, visit: [www.prisma-statement.org](http://www.prisma-statement.org).

# BMJ Open

## Motivating factors on performance of primary care workers in China: A systematic review and meta-analysis

|                                 |                                                                                                                                                                                                                                                                                                                          |
|---------------------------------|--------------------------------------------------------------------------------------------------------------------------------------------------------------------------------------------------------------------------------------------------------------------------------------------------------------------------|
| Journal:                        | <i>BMJ Open</i>                                                                                                                                                                                                                                                                                                          |
| Manuscript ID                   | bmjopen-2018-028619.R2                                                                                                                                                                                                                                                                                                   |
| Article Type:                   | Original research                                                                                                                                                                                                                                                                                                        |
| Date Submitted by the Author:   | 11-Oct-2019                                                                                                                                                                                                                                                                                                              |
| Complete List of Authors:       | Li, Huiwen; China Centre for Health Development Studies, Peking University<br>Yuan, Beibei; China Centre for Health Development Studies, Peking University<br>Wang, Dan; China Centre for Health Development Studies, Peking University<br>Meng, Qingyue; China Centre for Health Development Studies, Peking University |
| <b>Primary Subject Heading</b>: | Public health                                                                                                                                                                                                                                                                                                            |
| Secondary Subject Heading:      | Health services research, Health policy, General practice / Family practice                                                                                                                                                                                                                                              |
| Keywords:                       | Primary health care, Primary health worker, Motivation, Performance, Health policy < HEALTH SERVICES ADMINISTRATION & MANAGEMENT                                                                                                                                                                                         |
|                                 |                                                                                                                                                                                                                                                                                                                          |

SCHOLARONE™  
Manuscripts

1  
2  
3  
4 **1 Motivating factors on performance of primary care workers in China:**  
5  
6  
7 **2 A systematic review and meta-analysis**  
8  
9

10  
11  
12  
13  
14  
15  
16  
17  
18  
19  
20  
21  
22  
23  
24  
25  
26  
27  
28  
29  
30  
31  
32  
33  
34  
35  
36  
37  
38  
39  
40  
41  
42  
43  
44  
45  
46  
47  
48  
49  
50  
51  
52  
53  
54  
55  
56  
57  
58  
59  
60

3

4 Huiwen Li, Beibei Yuan\*, Dan Wang and Qingyue Meng

5

6 China Centre for Health Development Studies, Peking University, Beijing, China

7 (H Li Ph.D, Prof. B Yuan Ph.D, D Wang MD, Prof. Q Meng Ph.D)

8 Email: hli@bjmu.edu.cn, beibeiyuan@pku.edu.cn, wangdanevelyn@163.com,

9 qmeng@pku.edu.cn

10

11 Correspondence: Prof Beibei Yuan, China Centre for Health Development Studies, Peking

12 University, Beijing 100191, China

13 Email: beibeiyuan@pku.edu.cn

14

15 **Number of tables and figures:** 2 tables and 3 figures are included in this article.

16

17

18

## 19 Abstract

20 **Objective:** Although China has made remarkable progress in strengthening its primary health  
21 care system, lack of well-performed primary health workforce is still the bottleneck of  
22 deepening the reform. The objective of this review is to understand the current profile of  
23 Chinese primary care workers (PCWs) and their motivating factors of performance and  
24 propose targeted policy suggestions on improving their work performance.

25 **Design:** Systematic review

26 **Methods:** A systematic search of PubMed and MEDLINE was conducted to identify articles  
27 published from Jan 1, 2000 to Jun 2, 2018. Quality assessment and data extraction for the  
28 studies closely relevant to performance of PCWs in China were conducted by two reviewers  
29 independently. A preliminary framework containing different levels of factors influencing  
30 PCWs' motivation based on ERG theory guided the synthesis analysis. In addition, we used a  
31 random-effects model to pool individual studies on job satisfaction and estimate the overall  
32 job satisfaction of PCWs.

33 **Results:** A total of 36 articles were included; 16 (23 882 participants) in the meta-analysis.  
34 Regarding the individual level of motivation, 3 overarching themes and 12 sub-themes were  
35 developed. The sub-themes of financial incentives, career advancement and work itself were  
36 frequently mentioned and have more influences on PCWs' performance. Moreover, the  
37 healthcare system reform policies have inevitable and complex impacts on different levels of  
38 human needs, and then influences on the motivation and performance of PCWs.  
39 Meta-analysis showed that the overall job satisfaction score among PCWs was 3.30, just

1  
2  
3  
4 40 reaching a satisfied rating and varied in different regions.  
5  
6

7 41 **Conclusions:** This study suggests low work satisfaction among PCWs in China, with  
8  
9  
10 42 financial incentives and career advancement being two most important motivating factors.  
11  
12 43 Efforts to improve the work performance in PCWs should give priority to these motivating  
13  
14  
15 44 factors and systematically take into account the health policy's impacts on performance of  
16  
17 45 PCWs.  
18  
19

## 20 21 46 **Keywords**

22  
23  
24 47 Primary health care, Primary care worker, Performance, Motivation, Health policy  
25  
26

## 27 48 **Strengths and limitations of this study**

28  
29  
30 49 ► A myriad of potentially eligible articles were screened and included using a comprehensive  
31  
32  
33 50 search strategy.  
34  
35

36 51 ► Reliability of the study selection, data extraction and quality assessment was ensured by  
37  
38  
39 52 involving two independent reviewers.  
40  
41

42 53 ► This review contributes to the current literature as it included studies that adopted  
43  
44  
45 54 qualitative, quantitative or mix methods to present a comprehensive overview of the  
46  
47  
48 55 motivating factors on performance of China's primary care workers.  
49

50 56 ► This study benefited from summarizing all the motivating factors on performance of  
51  
52  
53 57 China's primary care workers in a systematical way, namely, at both an individual level and a  
54  
55  
56 58 health system level.  
57

58  
59 59 ► Chinese articles were not included in this review.  
60

## 60 **Introduction**

61 In China, the primary health care (PHC) services that include public health services and basic  
62 medical health services are provided by community health centres (CHCs) and their affiliated  
63 community health stations (CHSs) in the urban areas and by township health centres (THCs)  
64 and their affiliated village clinics (VCs) in the rural areas. These four types of PHC  
65 institutions constitute the essential part of China's three-tertiary health care delivery network.  
66 Administered by CHCs and THCs respectively, CHSs and VCs function as the satellite sites  
67 of their superior institutions. As is central to China's health system reform initiated in 2009<sup>1</sup>,  
68 the strengthening of the primary health care has been hindered by the grave challenges  
69 concerning the structure of China's health care delivery system, in particular, the  
70 low-performance of PHC delivery system<sup>2</sup>. From 2010 to 2016, China's PCWs have  
71 experienced a rise in their number from 3.3 million to 3.7 million, but a decrease in their  
72 proportion in health workers, from 40.0% to 33.0%. This trend is mirrored by the utilization  
73 of health services during the same period of time: PHC institutions' proportion has dropped  
74 from 61.9% (3.6 billion visits) to 55.1% (4.4 billion visits) in terms of the outpatient visits  
75 and from 27.9% (39.5 million hospitalizations) to 18.3% (41.7 million hospitalizations) in  
76 terms of the inpatient visits<sup>3</sup>. Against this backdrop, the strengthening of primary health  
77 system will remain as the focus of health system reform in the near future, which can be seen  
78 from the fact that *the Outline of Healthy China 2030 Plan*, the government's blueprint for  
79 health system development, has underscored the importance of primary health care<sup>4</sup>.

80 Health workforce shortage is one of the major obstacles to strengthen China's primary health  
81 care services<sup>5</sup>. To make matters worse, the primary health workforce is confronted with

1  
2  
3  
4 82 serious challenges such as low education level, lack of qualifications, aging, high turnover  
5  
6 83 and poor working performance<sup>6</sup>. Of all the determinants of PCWs' performance, work  
7  
8  
9 84 motivation, defined as an individual's degree of willingness to exert and maintain an effort  
10  
11 85 towards organizational goals<sup>7</sup>, plays a crucial role in changing the behavior of health  
12  
13  
14 86 providers. It has been demonstrated that work motivation can influence job satisfaction, hence  
15  
16  
17 87 influencing job performance<sup>8 9</sup>. There has been an expanding body of studies exploring the  
18  
19  
20 88 motivating factors for PCWs through qualitative, quantitative or mixed methods, but the study  
21  
22  
23 89 sites and methodological quality of these studies varied. Synthesizing these motivating factors  
24  
25 90 in different areas of China could help identify the most important motivating factors and  
26  
27 91 appreciate the overall job satisfaction level of PHWs in China. In addition, synthesizing the  
28  
29  
30 92 motivating factors for PCWs and analyzing the complexity pathway between motivating  
31  
32  
33 93 factors and performance hold general and applicable implications for improving the  
34  
35 94 motivation and performance of China's PCWs. In light of this, this review aims to synthesize  
36  
37  
38 95 and analyze the motivating factors for PCWs and provide evidence-based policy implication  
39  
40  
41 96 on how to improve the performance of China's PCWs.

## 97 **Methods**

### 98 **Search strategy and eligibility criteria**

99 We searched the PubMed and MEDLINE on June 2, 2018 to identify relevant studies  
100 using MeSH terms in conjunction with free-text words including all the possible synonyms,  
101 alternative terms and spellings<sup>6</sup> to increase sensitivity to any potentially eligible literature. All  
102 the search terms were provided in the Supplementary Appendix 1. Search results were



1  
2  
3  
4 103 exported to EndNote X7 to be organized and duplicate records were removed in the first  
5  
6 104 place. Then two authors exported the citations to Microsoft Excel and conducted the literature  
7  
8  
9 105 screening and selection independently. Divergent judgments were settled through discussion.  
10  
11 106 We searched for and included articles about the motivating factors on performance of the  
12  
13 107 PCWs who work in four types of China's PHC institutions: rural THCs, rural VCs, urban  
14  
15 108 CHCs and urban CHSs. In this study, motivation in the work context is defined as an  
16  
17 109 individual's degree of willingness to exert and maintain an effort towards organizational or  
18  
19 110 system goals<sup>10</sup>, and the degree of job satisfaction, work stress and turnover intention seen as  
20  
21 111 possible reflections of motivation which may influence work performance. Therefore, all the  
22  
23 112 studies that explored the level of work motivation, job satisfaction, work stress, turnover  
24  
25 113 intention and the influencing factors of these motivation expressions were included. We also  
26  
27 114 searched for relevant studies found in the references of the included articles and other sources.  
28  
29 115 The included studies adopted either observational or experimental design, and presented  
30  
31 116 primary quantitative or qualitative data. All the included articles were in English language  
32  
33 117 and published between 2000 and 2018. Studies were excluded if they did not address the  
34  
35 118 motivating factors for PCWs, or if the participants were not PCWs or did not work in the four  
36  
37 119 types of PHC institutions mentioned above.  
38  
39  
40  
41  
42  
43  
44  
45  
46  
47  
48

## 120 **Assessment of risk of bias**

121 Methodological quality of the included studies was evaluated using Hoy's risk of bias  
122 tool which is adapted from the one developed by Leboeuf-Yde and Lauritsen<sup>11</sup>. Based on a  
123 total score, studies are put into three categories: low risk of bias (8-10), moderate risk of bias

1  
2  
3  
4 124 (5-7) and high risk of bias (0-4).  
5  
6  
7

8 125 **Data extraction and synthesis**  
9

10  
11 126 Extracted data included study design, year or years of study, settings, participants,  
12  
13 127 sample sizes, measurement of motivation, objective, key motivation, conclusions and  
14  
15  
16 128 motivating factors. Data extraction and analysis were guided by Alderfer's ERG theory, which  
17  
18 129 proposes three core human needs in organizational settings: existence (the desire for material  
19  
20 130 things), relatedness (the desire for cordial interpersonal relations), and growth (the desire for  
21  
22 131 opportunities to be creative and to develop one's skills)<sup>12</sup>. A thematic synthesis approach was  
23  
24 132 adopted for data analysis to capture the evidence illustrating PCWs' motivation. Motivating  
25  
26 133 factors extracted from the included articles were grouped into four themes: 1) factors  
27  
28 134 concerning the existence needs, including payment, fringe benefits and physical working  
29  
30 135 conditions; 2) factors concerning the relatedness needs, which are concerned with social  
31  
32 136 environment and relationship; 3) factors concerning the growth needs, referring to career or  
33  
34 137 self-development and management environment; 4) factors concerning the health policy  
35  
36 138 context and organizational context that could influence one or more needs categories  
37  
38 139 mentioned above (Supplementary Appendix 2) . The first three themes of motivating factors  
39  
40 140 represented, at an individual level, three different dimensions of human needs in PHC  
41  
42 141 institutions based on the ERG framework and the last theme was singled out because different  
43  
44 142 health policies had complex impacts on the performance by influencing more than one  
45  
46 143 dimension of human needs at a macro level. First, authors aggregated data into motivating  
47  
48 144 factors and extracted all original motivating factors in each article to put them into one of the  
49  
50  
51  
52  
53  
54  
55  
56  
57  
58  
59  
60

1  
2  
3  
4 145 four themes. Then we identified correlations between the different factors, refined them  
5  
6 146 through discussion and synthesized similar factors into a higher level theme.  
7  
8  
9

10 147 As job satisfaction was positively associated with job performance<sup>13</sup> and nearly half of  
11  
12 148 the selected articles studied job satisfaction with quantitative measurement, we resorted to  
13  
14 149 meta-analysis to synthesize the 16 articles that provide data of PCWs' job satisfactions. We  
15  
16 150 unified the measurement of overall job satisfaction by transforming different calculations into  
17  
18 151 a 5-point rating scale and pooled the study-specific estimates using a random effects  
19  
20 152 meta-analysis model to obtain an overall summary of the job satisfaction scores across studies  
21  
22 153 <sup>14</sup>. We analyzed the data using Stata version 14.0 for Windows.  
23  
24  
25  
26  
27  
28

#### 29 154 **Patient and public involvement**

30  
31  
32 155 Patients and public were not involved in this study.  
33  
34  
35

#### 36 156 **Role of the funding source**

37  
38  
39 157 The funders of the study had no role in study design; data collection, analysis and  
40  
41 158 interpretation; writing of the report; and the decision to submit the paper for publication.  
42  
43  
44  
45

### 46 159 **Results**

#### 47 48 49 160 **Characteristics of reviewed studies**

50  
51  
52 161 We firstly screened 5466 titles and abstracts, and then retrieved and screened the  
53  
54 162 full-texts of 348 potential relevant studies to evaluate their eligibility (Figure 1). After the full  
55  
56 163 text screening, 119 studies relevant to the human resources of PHC in China were included  
57  
58  
59  
60

1  
2  
3  
4 164 for us to appreciate the current status of PCWs. To obtain sufficient information related to the  
5  
6 165 motivation of PCWs, 1 additional article from reference search was also identified and  
7  
8  
9 166 included after applying the eligibility criteria. Finally, of the 119 studies, 83 articles that did  
10  
11 167 not contain specific motivating factors were excluded; 36 articles that were closely relevant to  
12  
13  
14 168 PCWs' motivation for were selected for data extraction and synthesis. A list of the basic  
15  
16  
17 169 characteristics of the included articles can be found in Supplementary Appendix 3. 25  
18  
19 170 quantitative, 7 qualitative, and 4 mixed methods primary studies were included, covering at  
20  
21  
22 171 least 27 provinces of China. All of the 36 articles were cross-sectional studies, with 17 studies  
23  
24 172 taking place in rural China, 11 in urban China and 8 in both China's urban and rural areas. Of  
25  
26  
27 173 the 17 studies concerning rural areas, 8 articles only included village doctors in village clinics  
28  
29  
30 174 as participants, 5 articles only studied health workers in THCs and 4 articles were concerned  
31  
32  
33 175 with rural PCWs in both village clinics and THCs. The 11 studies that were concerned with  
34  
35  
36 176 urban areas addressed urban PCWs in community health centers/stations. 4 articles studied all  
37  
38 177 types of PCWs in different kinds of rural and urban PHC institutions. As for the risk of bias,  
39  
40  
41 178 more than half of the included studies presented a low risk of bias, with the total score  
42  
43 179 ranging from six points to ten points (in Supplementary Appendix 3). Included studies  
44  
45  
46 180 analyzed the motivation of PCWs from different perspectives: some measured job satisfaction  
47  
48 181 <sup>15-30</sup>; some explored the motivating factors' influence on attrition and retention<sup>18 22 31-35</sup>; some  
49  
50  
51 182 studied the impact of some policies or interventions on the motivating factors for health  
52  
53  
54 183 workers <sup>31 36-40 41-46</sup>.

## 184 **Motivating factors for PCWs**

1  
2  
3  
4 185 **Factors concerning existence needs**  
5  
6

7 186 Financial incentives, workload and the work conditions related to a person's physical  
8  
9  
10 187 needs such as food, clothing, and shelter were clustered into factors concerning existence  
11  
12 188 needs. In this review, we found that work conditions, payment and the mandatory workload  
13  
14  
15 189 were considered as significant factors of PCWs' satisfaction<sup>15 19 20 22 23 25 30 47</sup> and turnover  
16  
17 190 intention<sup>18 22</sup>. 26 out of the 36 articles reported financial incentives (Table 1) and found that  
18  
19  
20 191 the financial incentives such as income and fringe benefits were significantly associated with  
21  
22 192 job satisfaction<sup>15 17 30</sup> and difficulties in PCW recruitment<sup>32 34 35</sup>. Moreover, financial  
23  
24  
25 193 incentives and working conditions were the top two motivating factors for PCWs to improve  
26  
27  
28 194 performance<sup>21 33</sup>.

29  
30  
31 195 Another line of inquiry explored the impact of different health system reform policies  
32  
33 196 on motivating factors. For example, in a qualitative study, administrators and frontline  
34  
35  
36 197 healthcare workers in PHC institutions mentioned that the increased income after the 2009  
37  
38  
39 198 health system reforms did not fully reflect the increased workload, and those who worked the  
40  
41  
42 199 most were not necessarily rewarded the most, constituting a demotivating factor for some  
43  
44 200 health workers<sup>37</sup>.

45  
46  
47 201 **Factors concerning relatedness needs**  
48  
49

50 202 Relatedness needs refer to a person's interpersonal needs in his personal and  
51  
52  
53 203 professional settings and in this review, factors concerning relatedness needs were deemed as  
54  
55  
56 204 a person's relationships with the living environment, the society, the coworkers and the nature  
57  
58  
59 205 of work.  
60

1  
2  
3  
4 206 17 studies reported work itself and 11 studies reported work relationships (Table 1).  
5  
6 207 Compared with factors concerning existence needs, the PCWs were more satisfied with the  
7  
8  
9 208 nature of work and work relationships<sup>20 25 30</sup>. This finding indicated that most workers got  
10  
11  
12 209 along well with their colleagues and believed that their jobs were to be of value, which can  
13  
14 210 act as a motivating factor in case of poor physical environment.

17  
18 211 13 of the selected studies reported recognition from society including being understood  
19  
20 212 by society and physician-patient relationships (Table 1). Satisfaction with social status and  
21  
22 213 relationship with patients was significantly associated with job satisfaction<sup>15 30</sup>. In terms of  
23  
24 214 patients' respect, there seemed to be an urban-rural difference, with the rural PCWs being  
25  
26 215 slightly more satisfied than their urban counterparts<sup>23</sup>. However, few rural PCWs expressed  
27  
28 216 satisfaction with their current relationships and indicated that the patients could not  
29  
30 217 understand the doctor's work<sup>47</sup>. In addition, the growing workplace violence negatively  
31  
32 218 affected the PCWs' job performance and quality of life<sup>48</sup> and emerged as a major contributor  
33  
34 219 to doctors' low morale in recent years<sup>16</sup>.

35  
36  
37  
38  
39  
40  
41 220 6 studies reported living environment as a factor concerning relatedness needs (Table  
42  
43 221 1) and showed that compared with urban areas, rural areas had greater needs to improve the  
44  
45 222 living environment<sup>21 33</sup>. In addition, young health workers' weakening sense of belonging and  
46  
47 223 responsibility to their hometown has made it more difficult to recruit young health workers  
48  
49 224 born in local areas<sup>32</sup>.

#### 225 **Factors concerning growth need factors**

56  
57  
58 226 Career advancement, training, rewards, management and autonomy relating to a  
59  
60

1  
2  
3  
4 227 person's needs of personal development were considered as factors concerning growth needs  
5  
6 228 in this review.  
7  
8  
9

10 229 19 out of the 36 articles reported the factor of career advancement (Table 1), which was  
11  
12 230 considered as the one of top three contributors to satisfaction<sup>15 16 19 20 22 23 29</sup>. The gap between  
13  
14 231 the expected and actual professional development was one of the main sources of job  
15  
16 232 dissatisfaction<sup>17</sup>. Limited opportunities for job promotion was another factor contributing to  
17  
18 233 the low levels of work passion<sup>19</sup> and turnover intentions of village doctors<sup>18 22</sup>. The main  
19  
20 234 causes might be that few positions and opportunities were available for the health  
21  
22 235 professionals in PHC institutions to get higher professional titles on the regular payroll,  
23  
24 236 especially compared with the opportunities that their counterparts in higher level health  
25  
26 237 institutions can enjoy.  
27  
28  
29  
30  
31  
32

33 238 Training was mentioned as a motivating factor by 13 out of the 36 articles (Table 1).  
34  
35 239 Learning and training were significantly associated with work passion<sup>19</sup>, job satisfaction<sup>15</sup>  
36  
37 240 <sup>29</sup>and turnover intention<sup>22</sup>. Along with career advancement, training was also considered as  
38  
39 241 one of the most important motivating factors for PCWs to improve performance<sup>21</sup>. However,  
40  
41 242 training arrangements were inadequate<sup>34 49 50</sup> to address the fragmented needs of China's  
42  
43 243 PCWs. Health workers preferred more training time for practice-focused training (on-site  
44  
45 244 guidance from senior doctors and further clinical education) over knowledge-focused training,  
46  
47 245 and favoured such training contents as clinical skills, preventive healthcare and medication  
48  
49 246 knowledge education<sup>49</sup>. As a result, although training was reported as an effective incentive  
50  
51 247 in recruitment, it failed to act as an effective motivating factor to attract young doctors to rural  
52  
53 248 areas in China<sup>34</sup>.  
54  
55  
56  
57  
58  
59  
60

1  
2  
3  
4 249 Among the selected studies, the number of studies that reported the motivating factors  
5  
6 250 of rewards, management and autonomy stood at 9, 9 and 14, respectively (Table 1).  
7  
8  
9 251 According to most of the selected articles, PCWs were relatively satisfied with the  
10  
11 252 decision-making ability of their superiors, the contingent rewards and the opportunities to do  
12  
13  
14 253 work by making decisions on their own and to utilize their professional skills and talents <sup>15 22</sup>.

### 254 **System and policy factors**

255 Motivation was not only influenced by the motivating factors at the individual level,  
256 but also by the health sector reforms and specific incentive schemes that target workers <sup>7</sup>.  
257 Theoretically, any health sector reform would directly influence the motivating factors that  
258 the health workers feel or that affect the structure of health organizations, thus in turn  
259 affecting the work rewards of the health workers. 18 out of the 36 articles reported  
260 macro-level factors (Table 1), namely, the health system and policy factors such as National  
261 Essential Medicines System (NEMS), National Basic Public Health Service Program  
262 (NBPHSP) and Township and Village Health Services Integration Management (TVHSIM)  
263 (Supplementary Appendix 4) . The gap between the intended and actual consequences of  
264 the policies was one of the main determinants of job satisfaction <sup>17</sup>. The comprehensive  
265 reform of PHC in Anhui has changed PCWs' compensation structure and improved their  
266 income and work efficiency, but dampened their work enthusiasm because of the poorly  
267 designed performance-based evaluation system<sup>37</sup>. Different economic status and health reform  
268 processes may lead to different consequences. Take the comprehensive reform of PHC in  
269 Shandong as an example. PCWs there on the one hand complained about increased trivialities  
270 at work, heavier workload, blurry job description, unsatisfactory income and a lack of



1  
2  
3  
4 271 professional development, but on the other hand were satisfied with the relationships with the  
5  
6 272 community and low work pressure<sup>41</sup>.  
7  
8  
9

10 273 The NEMS included a new National Essential Drugs List to ensure free access to safe  
11  
12 274 and effective medication for the patients, and introduced a series of polices on drug  
13  
14  
15 275 production, pricing and distribution in the hope of promoting the rational use of medications  
16  
17 276 by reducing the reliance on drug sales and profit seeking behaviors. To be more specific, only  
18  
19  
20 277 drugs on the list were allowed to be prescribed in VCs and price mark-ups were forbidden.  
21  
22  
23 278 The impacts of the NEMS varied by region, professional practice and income level<sup>42</sup>. In one  
24  
25 279 survey, most PCWs perceived no change in their income and reported a high level of  
26  
27  
28 280 satisfaction towards NEMS<sup>45</sup>. However, according to another in-depth interview with village  
29  
30 281 doctors<sup>36</sup>, the introduction of the essential drug list for PHC institution dramatically reduced  
31  
32  
33 282 their medical income as most areas had limited government subsidies to supplement their  
34  
35  
36 283 incomes. At the same time, they also complained that they had lost patients' trust and work  
37  
38 284 enthusiasm as the classes and total amount of essential medicines were not enough to meet  
39  
40  
41 285 daily treatment needs<sup>42 45</sup>.  
42  
43

44 286 The NBPSP starting from 2009 provided a package of basic public health services for  
45  
46  
47 287 all residents, with a focus on the management of non-communicable disease. To motivate  
48  
49 288 PCWs to provide preventive health services, the government grants subsidies based on the  
50  
51  
52 289 number of covered residents. At the beginning of this reform, due to the broad scope of basic  
53  
54  
55 290 public health services and limited financial incentives, providers felt that they were under  
56  
57 291 great stress due to the competing demands for their time and complained about the heavy  
58  
59  
60 292 workload, insufficient remuneration, staff shortage, lack of formal professional identity and

1  
2  
3  
4 293 ineffective performance appraisal. In addition, providers had to deal with the distrust and  
5  
6 294 disrespect from some residents<sup>40 46</sup>, especially those public health workers who were  
7  
8  
9 295 dismissed as having lower levels of knowledge and skill than specialists<sup>39</sup>. Providers with  
10  
11 296 more subsidies, training opportunities and integrated management had better performance in  
12  
13  
14 297 service provision<sup>44</sup>.

15  
16  
17 298 The TVHSIM required THCs, the upper-level health institutions, to direct and  
18  
19 299 supervise VCs in their routine work and their work in medicine, personnel management,  
20  
21 300 financing, and the upgrade and maintenance of facilities, resulting in mixed impacts on  
22  
23 301 village doctors. On the one hand, most village doctors felt more respected under this  
24  
25 302 integrated management because they were more recognized as health workers in a formal  
26  
27 303 health system rather than private drug salesmen. On the other hand, they were not allowed to  
28  
29 304 perform agricultural or any other side activity for extra money<sup>26 36</sup>, which negatively affected  
30  
31 305 their financial conditions.  
32  
33  
34  
35  
36  
37  
38  
39

#### 40 306 **Job satisfaction for PCWs**

41  
42  
43 307 The performance of healthcare delivery system is critically dependent on workers'  
44  
45 308 motivation which is directly mediated by workers' willingness<sup>7</sup>. As an important indicator to  
46  
47 309 measure workers' willingness to exert efforts, satisfaction is highly relevant for the  
48  
49 310 sustainable development of PHC in China. 16 included articles assessed job satisfaction as an  
50  
51 311 important dimension reflecting providers' motivation (See supplementary Appendix 5). A  
52  
53 312 total of 19 investigation samples were extracted from these 16 articles with cross-sectional  
54  
55 313 study design, representing more than half of the provinces in China. In particular, 2 articles<sup>24</sup>  
56  
57  
58  
59  
60

1  
2  
3  
4 314 <sup>25</sup> provided data of 2 provinces/cities and 1 article<sup>20</sup> represented data of two years. The overall  
5  
6  
7 315 job satisfaction score ranged from 1.82 to 4.49 and also varied from region to region (Figure  
8  
9 316 2). To be more specific, for most samples drawn from more than three provinces, the  
10  
11 317 satisfaction scores leveled off between 3.37 and 3.55, but the samples from the middle area  
12  
13  
14 318 samples scored lower than those from the eastern area. Besides, the score of Xinjiang, the  
15  
16  
17 319 representative of the western areas, was the highest among the included samples.

20 320 Meta-analysis was approached by combining results weighted by sample size and  
21  
22  
23 321 showed that the overall job satisfaction score among PCWs was 3.30, equivalent 0.66 ([95%  
24  
25 322 CI 0.61–0.71]; I<sup>2</sup>=98.7%; P<0.001; Figure 3), just reaching a level indicating satisfaction. But  
26  
27  
28 323 the overall satisfaction mean of rural health workers was lower than that of the urban health  
29  
30  
31 324 workers (Table 2).

## 325 Discussion

326 **Financial incentives and career advancement were the top two motivating factors**  
327 **for PCWs in China.** In the included articles, the balance between remuneration,  
328 workload, and career promotion opportunities was most frequently mentioned as a critical  
329 motivating factor on PCW's performance. In spite of Chinese government's considerable  
330 investments in recent years to improve the income of the health workers in PHC institutions,  
331 the gap between the actual and expected income continued to widen due to increasing  
332 urbanization and ever growing living costs. According to some doctors in THCs, the  
333 performance-based salary means that 30-40% of the salary was based on their workload,  
334 quality of service and patients' satisfaction, but due to the limit of overall revenue and revenue

1  
2  
3  
4 335 structure, the well-performing health workers can only be rewarded by reducing the income  
5  
6 336 of their co-workers with poor performance. This payment method did not work well in reality  
7  
8  
9 337 as to motivate health workers. How to improve the income level of health workers in primary  
10  
11 338 health delivery system will remain a crucial but tricky issue in the near future. Besides, as  
12  
13  
14 339 shown in our analysis in Figure 2, financial incentives were no longer the sole means to  
15  
16  
17 340 promote motivation, improve job satisfaction and enhance work performance. Other factors,  
18  
19 341 in particular, professional development, work characteristics and training, have been equally,  
20  
21  
22 342 if not more, important for China's PCWs. More specifically, the lack of chances for  
23  
24  
25 343 professional title promotion and limited career development opportunities were important  
26  
27 344 reasons that lead to turnover intention. This finding is in line with other internationally  
28  
29  
30 345 published studies and underscores the importance of the non-financial as well as the financial  
31  
32 346 incentives<sup>7 51</sup>. The ERG framework implies that the fulfillment of human needs plays an  
33  
34  
35 347 important role in PCWs' motivation, but each individual prioritizes the existence needs,  
36  
37  
38 348 relatedness needs and growth needs differently. In this review, we found that the PCWs in  
39  
40  
41 349 China are confronted with barriers in fulfilling all of the three levels of human needs. Income  
42  
43 350 security has increased, but still far lower than the expected level; the residents' recognition of  
44  
45  
46 351 and cooperation with the PCWs have played a negative role in influencing the motivation and  
47  
48 352 behaviors of health workers; career promotion system and training arrangements did not meet  
49  
50  
51 353 their growths need neither. Policy makers must realize that a health worker has multiple needs  
52  
53 354 to be met simultaneously. In addition, motivation improvement should be prioritized in a way  
54  
55  
56 355 that suits local institutional environments and personal preference. A sole focus on one type  
57  
58 356 of need at a time cannot effectively motivate PCWs<sup>52</sup>.

1  
2  
3  
4 357 **The overall job satisfaction score among PCWs was still low, especially in rural**  
5  
6 358 **areas.** As the predictor of job satisfaction, the overall job satisfaction score reflects PCWs'  
7  
8  
9 359 emotional status and to what extent their human needs are satisfied. PCWs' performance can  
10  
11  
12 360 be considerably improved by identifying the motivating factors so as to increase their work  
13  
14 361 satisfaction. The most prominent factor causing the general dissatisfaction of PCWs,  
15  
16  
17 362 especially the PCWs in rural areas, was the financial rewards from work. In 2014, the annual  
18  
19 363 income of 84.06% village doctors was less than 30 000 RMB, much lower than the average  
20  
21  
22 364 income (56 394 RMB) of the doctors in Jiangxi province's higher level health institutions,  
23  
24 365 and nearly half of the village doctors thought that they earned less than other people in the  
25  
26  
27 366 local area<sup>15</sup>. In addition, as discussed above, the health system reform policies also had  
28  
29  
30 367 indirect and negative impacts on PCWs' income level and further reduced their job  
31  
32  
33 368 satisfactions. These findings hold significant implications for policy makers and PHC  
34  
35 369 institution managers who make efforts to improve workers' job satisfaction <sup>17 28</sup>. Another  
36  
37  
38 370 finding of the synthesis was the significant differences of satisfaction scores among eastern,  
39  
40  
41 371 western and middle regions of China. There is no doubt that imbalance exist among these  
42  
43 372 regions at all levels. As for the satisfactions of PCWs, provinces in the eastern region, with  
44  
45 373 more developed economy and better health facilities, scored higher than provinces in the  
46  
47  
48 374 middle region and lower than provinces in the western region. Considering western China are  
49  
50  
51 375 remote areas with less economic development, the higher job satisfaction of PCWs may be  
52  
53 376 explained by the lower expectations of PCWs, more government subsidies and other central  
54  
55  
56 377 government supports that target remote western areas. In light of this, the government should  
57  
58 378 take into account the imbalanced development of China's different areas, especially China's  
59  
60

1  
2  
3  
4 379 middle area where the economic development and resources are limited and the central  
5  
6 380 government's subsidies are also absent.  
7  
8  
9  
10  
11 381 **The health system reform and some specific policies have inevitable and indirect**  
12  
13 382 **impacts on PCWs.** In 2009, China launched a landmark healthcare reform which aims at  
14  
15 383 providing affordable and equitable basic health care for all by 2020<sup>5</sup>. As strengthening the  
16  
17 384 primary health system is central to the health system reform, several policies have directly  
18  
19 385 targeted PHC institutions or PCWs. As a result, the satisfaction of pay and contingent rewards  
20  
21 386 have improved slightly, which may be attributed to the fact that PCWs' basic wages are  
22  
23 387 guaranteed by government finance <sup>20</sup>. However, despite of the progress China has made in  
24  
25 388 enhancing the primary health system, new problems and unintended consequences of related  
26  
27 389 reforms have surfaced. For example, the brain drain of experienced health workers and the  
28  
29 390 loss of patients from THCs to county hospitals have incurred a great cost<sup>6,31</sup>. As for the health  
30  
31 391 system reforms, three policies and their respective impacts on health workers' motivation  
32  
33 392 were most studied in the literature.  
34  
35  
36  
37  
38  
39  
40  
41

42 393 Since its introduction in 2009<sup>36</sup>, the NEMS has exerted a lasting impact on PCWs'  
43  
44 394 income structure. The essential drug list removed the incentives for over-prescribing,  
45  
46 395 resulting in a drop in income and a loss of autonomy <sup>31</sup> because government subsidies for  
47  
48 396 public health workers were not enough to compensate the decline in PHC institutions'  
49  
50 397 revenue from drug prescriptions. Along with the problems in drug supply procurement,  
51  
52 398 unintended consequences on health workers' motivation and related behaviors also emerged:  
53  
54 399 THCs has suffered a brain drain of experienced health workers who have flowed to county  
55  
56  
57  
58  
59  
60

1  
2  
3  
4 400 hospitals because their prescriptions have been restricted due to a limited supply of medicines  
5  
6  
7 401 and they have lost many patients as a result. In conclusion, policy makers should consider  
8  
9 402 how to reduce the policy's adverse effects on the motivation of PCWs, including how to  
10  
11 403 appropriately remunerate health workers, ensure enough clinical autonomy and supply the  
12  
13  
14 404 drugs in a timely, transparent and accountable manner.

15  
16  
17 405 At the beginning of the NBPHSP, the PCWs responsible for basic public health  
18  
19 406 services held negative attitudes toward the sustainable provision of these services because it  
20  
21  
22 407 was accompanied by a heavier workload and insufficient subsidy to compensate their efforts  
23  
24  
25 408 <sup>38 40 46 53</sup>. To motivate PCWs, the government has increased the subsidies from 15 RMB per  
26  
27  
28 409 person in 2009 to 50 RMB in 2017. However, the combination of heavy workload, rigid  
29  
30  
31 410 performance assessment procedure and lack of professional knowledge remained unchanged,  
32  
33 411 resulting in a negative effect on PCWs' job satisfaction and performance. We suggest that the  
34  
35  
36 412 evaluation of PCWs' performance be shifted from being fault-finding oriented to being  
37  
38  
39 413 support-providing oriented, such as improving the ability of public health providers or  
40  
41  
42 414 strengthening the teamwork between clinical doctors and the public health workers in order to  
43  
44 415 enhance the overall delivery of these public health services.

45  
46  
47 416 After the implementation of TVHSIM, the village doctors who had been previously  
48  
49 417 self-employed and not integrated into the formal health delivery system, were managed in the  
50  
51  
52 418 same way as THC staffs and experienced a transformation of their income structure as  
53  
54  
55 419 government subsidy has become an increasing source of income. They were motivated not  
56  
57  
58 420 only by the more stable financial subsidy from government, but also by the good reputation  
59  
60 421 and respect from local residents as health providers with formal status. However, their income

1  
2  
3  
4 422 and fringe benefits still lagged behind the regular employees in THCs, which remained an  
5  
6 423 demotivating factor for village doctors<sup>34</sup>. A well-rounded social insurance model for village  
7  
8  
9 424 doctors is urgently needed <sup>43</sup>.

10  
11  
12 425 The rationale for using ERG theory to guide the analysis lies in the fact that this  
13  
14  
15 426 needs-based theory generally encompasses work motivation, provides a useful  
16  
17 427 conceptualization of what PCWs care about (motivating factors) and explains their  
18  
19  
20 428 performance in organizations. The findings of this review suggest that PCWs can be  
21  
22  
23 429 encouraged to perform well by positive motivations responding to satisfying ERG needs, but  
24  
25 430 it should be interpreted with caution because of several limitations. First, this review only  
26  
27  
28 431 focuses on the motivating factors of PCWs' work performance, therefore, other relevant  
29  
30 432 articles on motivating factors influencing the attraction of PCWs were excluded by the search  
31  
32  
33 433 strategy. Second, all the included studies analyzed PCWs' motivation from the perspective of  
34  
35  
36 434 problems and critics, which could lead to some bias because few positive thoughts on PCW's  
37  
38  
39 435 current motivation status have been reported. Third, factors related to personal  
40  
41 436 sociodemographic characteristics and mental state were not analyzed as motivating factors.  
42  
43  
44 437 They were only exacted from the original article and presented as influencing factors, as  
45  
46 438 shown in the Supplementary Appendix 3.

47  
48  
49 439

## 50 51 52 53 440 **Conclusions**

54  
55  
56 441 Low motivation is at the crux of promoting the work performance of China's  
57  
58 442 on-service PCWs. Policy makers should take into account all level of human needs that



1  
2  
3  
4 443 influence PCWs' motivation and start from the local reality to set priorities to ensure of  
5  
6 444 PCWs' appropriate remuneration and career development opportunities. Just as illustrated by  
7  
8  
9 445 the *Global Strategy on Human Resources for Health*, efforts should be made to improve  
10  
11 446 deployment strategies, working conditions, reward systems, continuous professional  
12  
13 447 development opportunities and career pathways by adopting and implementing  
14  
15 448 evidence-based health workforce policies that are tailored to the local context so as to make  
16  
17 449 the best possible use of limited resources and enhance both capacity and motivation for  
18  
19 450 improved performance<sup>52</sup>. We also suggest that countries undergoing health system reform  
20  
21 451 should consider the views of different stakeholders and analyze the potential side effects of  
22  
23 452 some specific policies on health providers who are not directly targeted in order to benefit  
24  
25 453 both providers and demanders<sup>15</sup>.

454

## 455 **Abbreviations**

456 PCW: Primary care worker; PHC: Primary health care; CHC: Community health  
457 centre; CHS: Community health station; THC: Township health centre; VC: Village clinic;;  
458 NEMS: National Essential Medicines System; NBPHSP: National Basic Public Health  
459 Service Program; TVHSIM: Township and Village Health Services Integration Management;  
460 RMB: renminbi

## 461 **Acknowledgments**

462 We are grateful to Xi Li from National Clinical Research Center of Cardiovascular  
463 Diseases, State Key Laboratory of Cardiovascular Disease, Fuwai Hospital, National Center

1  
2  
3  
4 464 for Cardiovascular Diseases, Chinese Academy of Medical Sciences and Peking Union  
5  
6 465 Medical College, for their support and technical advice on the inclusion criteria.  
7  
8  
9

## 10 466 **Contributors**

11  
12  
13 467 All authors proposed the hypothesis and idea for the systematic review and take  
14  
15 468 responsibility for all aspects of it. QM, BY and HL discussed and contributed to the  
16  
17 469 conceptualization of this review and the development of review protocol. BY applied the  
18  
19 470 inclusion criteria. HL and DW extracted the data. HL was a major contributor to the draft of  
20  
21 471 the manuscript. All authors read and approved the final manuscript.  
22  
23  
24  
25

## 26 472 **Funding**

27  
28  
29  
30 473 This review was funded by National Natural Science Foundation of China (71403008)  
31  
32 474 and Alliance for Health Policy and Systems Research, World Health Organization.  
33  
34  
35

## 36 475 **Competing interests**

37  
38  
39 476 The authors declare that they have no competing interests.  
40  
41

## 42 477 **Provenance and peer review**

43  
44  
45 478 Not commissioned; externally peer reviewed.  
46  
47

## 48 479 **Data sharing statement**

49  
50  
51 480 There are no additional data available.  
52  
53  
54

## 55 481 **References**

- 56  
57 482 1. State Council of the People's Republic of China. Guanyu shenhua yiyao weisheng tizhi gaige de  
58 483 yijian (Opinions on Deepening Health System Reform). 2009 (in Chinese)  
59 484 2. Huang J, Shi L, Chen Y. Staff retention after the privatization of township-village health centers: a

- 1  
2  
3 485 case study from the Haimen City of East China. *BMC health services research* 2013;13:136.  
4 486 doi: 10.1186/1472-6963-13-136 [published Online First: 2013/04/17]  
5  
6 487 3. National Health and Family Planning Commission of the People's Republic of China. 2016 China  
7 488 health and family planning statistical yearbook. *Beijing: Peking Union Medical College*  
8 489 *Publishing House, 2017* (in Chinese)  
9  
10 490 4. CPC Central Committee, State Council. The plan for "Healthy China 2030".2016  
11 491 [http://www.gov.cn/zhengce/2016-10/25/content\\_5124174.htm](http://www.gov.cn/zhengce/2016-10/25/content_5124174.htm) (in Chinese).  
12 492  
13 493 5. Yip WC, Hsiao WC, Chen W, et al. Early appraisal of China's huge and complex health-care reforms.  
14 494 *Lancet (London, England)* 2012;379(9818):833.  
15 495 6. Li X LJ, Hu S, Cheng KK, De Maeseneer J, Meng Q, Mossialos E, Xu DR, Yip W, Zhang H, Krumholz  
16 496 HM, Jiang L, Hu S. The primary health-care system in China. *Lancet*  
17 497 2017;390(10112):2584-94.  
18 498 7. Franco LM, Bennett S, Kanfer R. Health sector reform and public sector health worker motivation: a  
19 499 conceptual framework. *Social Science & Medicine* 2002;54(8):1255.  
20 500 8. Dolea C, Adams O. Motivation of health care workers-review of theories and empirical evidence.  
21 501 *Cahiers de sociologie et de demographie medicales* 2005;45(1):135.  
22 502 9. Fisher CD. Why do lay people believe that satisfaction and performance are correlated? possible  
23 503 sources of a commonsense theory. *Journal of Organizational Behavior* 2003;24(6):753-77.  
24 504 10. Bennett S, Franco L. Health worker motivation and health sector reform. *Bethesda, Maryland, Abt*  
25 505 *Associates, Partnerships for Health Reform, [2000] 2000*  
26 506 11. Hoy D, Brooks P, Woolf A, et al. Assessing risk of bias in prevalence studies: modification of an  
27 507 existing tool and evidence of interrater agreement. *Journal of clinical epidemiology*  
28 508 2012;65(9):934-39.  
29 509 12. Alderfer CP. Existence, relatedness, and growth: Human needs in organizational settings.  
30 510 *Contemporary Sociology* 1974;3(6):511.  
31 511 13. Judge TA, Thoresen CJ, Bono JE, et al. The job satisfaction-job performance relationship: a  
32 512 qualitative and quantitative review. *Psychological Bulletin* 2001;127(3):376-407.  
33 513 14. Zhang M, Yang R, Wang W, et al. Job satisfaction of urban community health workers after the  
34 514 2009 healthcare reform in China: a systematic review. *International Journal for Quality in*  
35 515 *Health Care Journal of the International Society for Quality in Health Care* 2015;28(1):14.  
36 516 15. Zhang X, Fang P. Job satisfaction of village doctors during the new healthcare reforms in China.  
37 517 *Australian health review : a publication of the Australian Hospital Association*  
38 518 2016;40(2):225-33. doi: 10.1071/ah15205 [published Online First: 2016/02/26]  
39 519 16. Wu D, Wang Y, Lam KF, et al. Health system reforms, violence against doctors and job satisfaction  
40 520 in the medical profession: a cross-sectional survey in Zhejiang Province, Eastern China. *BMJ*  
41 521 *open* 2014;4(12):e006431. doi: 10.1136/bmjopen-2014-006431 [published Online First:  
42 522 2015/01/02]  
43 523 17. Li L, Zhang Z, Sun Z, et al. Relationships between actual and desired workplace characteristics and  
44 524 job satisfaction for community health workers in China: a cross-sectional study. *BMC family*  
45 525 *practice* 2014;15:180. doi: 10.1186/s12875-014-0180-y [published Online First: 2014/11/19]  
46 526 18. Fang P, Liu X, Huang L, et al. Factors that influence the turnover intention of Chinese village  
47 527 doctors based on the investigation results of Xiangyang City in Hubei Province. *International*  
48 528 *journal for equity in health* 2014;13:84. doi: 10.1186/s12939-014-0084-4 [published Online  
49  
50  
51  
52  
53  
54  
55  
56  
57  
58  
59  
60

1  
2  
3  
4  
5  
6  
7  
8  
9  
10  
11  
12  
13  
14  
15  
16  
17  
18  
19  
20  
21  
22  
23  
24  
25  
26  
27  
28  
29  
30  
31  
32  
33  
34  
35  
36  
37  
38  
39  
40  
41  
42  
43  
44  
45  
46  
47  
48  
49  
50  
51  
52  
53  
54  
55  
56  
57  
58  
59  
60

- 529 19. Luo Z, Bai X, Min R, et al. Factors influencing the work passion of Chinese community health  
530 service workers: an investigation in five provinces. *BMC family practice* 2014;15:77. doi:  
531 10.1186/1471-2296-15-77 [published Online First: 2014/06/03]
- 532 20. Ding H, Sun X, Chang WW, et al. A comparison of job satisfaction of community health workers  
533 before and after local comprehensive medical care reform: a typical field investigation in  
534 Central China. *PloS one* 2013;8(9):e73438. doi: 10.1371/journal.pone.0073438 [published  
535 Online First: 2013/09/24]
- 536 21. Hung LM, Shi L, Wang H, et al. Chinese primary care providers and motivating factors on  
537 performance. *Family practice* 2013;30(5):576-86. doi: 10.1093/fampra/cmt026 [published  
538 Online First: 2013/06/22]
- 539 22. Sun Y, Luo Z, Fang P. Factors influencing the turnover intention of Chinese community health  
540 service workers based on the investigation results of five provinces. *Journal of community  
541 health* 2013;38(6):1058-66. doi: 10.1007/s10900-013-9714-9 [published Online First:  
542 2013/06/19]
- 543 23. Shi L, Song K, Rane S, et al. Factors associated with job satisfaction by Chinese primary care  
544 providers. *Primary health care research & development* 2014;15(1):46-57. doi:  
545 10.1017/s1463423612000692 [published Online First: 2013/02/08]
- 546 24. Ge C, Fu J, Chang Y, et al. Factors associated with job satisfaction among Chinese community  
547 health workers: a cross-sectional study. *BMC public health* 2011;11:884. doi:  
548 10.1186/1471-2458-11-884 [published Online First: 2011/11/25]
- 549 25. Liu JA, Wang Q, Lu ZX. Job satisfaction and its modeling among township health center employees:  
550 a quantitative study in poor rural China. *BMC health services research* 2010;10:115. doi:  
551 10.1186/1472-6963-10-115 [published Online First: 2010/05/13]
- 552 26. Li T, Lei T, Sun F, et al. Determinants of village doctors' job satisfaction under China's health sector  
553 reform: a cross-sectional mixed methods study. *International journal for equity in health*  
554 2017;16(1):64.
- 555 27. Li L, Hu H, Zhou H, et al. Work stress, work motivation and their effects on job satisfaction in  
556 community health workers: a cross-sectional survey in China. 2014;4(6):e004897.
- 557 28. Zhang M, Yan F, Wang W, et al. Is the effect of person-organisation fit on turnover intention  
558 mediated by job satisfaction? A survey of community health workers in China. *BMJ open*  
559 2017;7(2):e013872.
- 560 29. Wang H, Tang C, Zhao S, et al. Job Satisfaction among Health-Care Staff in Township Health  
561 Centers in Rural China: Results from a Latent Class Analysis. *International journal of  
562 environmental research and public health* 2017;14(10) doi: 10.3390/ijerph14101101  
563 [published Online First: 2017/09/25]
- 564 30. Lu Y, Hu XM, Huang XL, et al. Job satisfaction and associated factors among healthcare staff: a  
565 cross-sectional study in Guangdong Province, China. *BMJ open* 2016;6(7):e011388. doi:  
566 10.1136/bmjopen-2016-011388 [published Online First: 2016/07/21]
- 567 31. Zhou XD, Li L, Hesketh T. Health system reform in rural China: voices of healthworkers and  
568 service-users. *Social science & medicine (1982)* 2014;117:134-41. doi:  
569 10.1016/j.socscimed.2014.07.040 [published Online First: 2014/07/27]
- 570 32. Chen M, Lu J, Hao C, et al. Developing challenges in the urbanisation of village doctors in  
571 economically developed regions: A survey of 844 village doctors in Changzhou, China. *The  
572 Australian journal of rural health* 2015 doi: 10.1111/ajr.12159 [published Online First:

- 1  
2  
3 573 2015/03/31]
- 4 574 33. Meng Q, Yuan J, Jing L, et al. Mobility of primary health care workers in China. *Human resources*
- 5 575 *for health* 2009;7(1):24.
- 6 576 34. Wang J, Su J, Zuo H, et al. What interventions do rural doctors think will increase recruitment in
- 7 577 rural areas: a survey of 2778 health workers in Beijing. *Human resources for health*
- 8 578 2013;11:40. doi: 10.1186/1478-4491-11-40 [published Online First: 2013/08/24]
- 9 579 35. Song K, Scott A, Sivey P, et al. Improving Chinese primary care providers' recruitment and
- 10 580 retention: a discrete choice experiment. *Health policy and planning* 2015;30(1):68-77. doi:
- 11 581 10.1093/heapol/czt098 [published Online First: 2013/12/21]
- 12 582 36. Zhang S, Zhang W, Zhou H, et al. How China's new health reform influences village doctors'
- 13 583 income structure: evidence from a qualitative study in six counties in China. *Human*
- 14 584 *resources for health* 2015;13:26. doi: 10.1186/s12960-015-0019-1 [published Online First:
- 15 585 2015/05/06]
- 16 586 37. Liu Q, Tian X, Tian J, et al. Evaluation of the effects of comprehensive reform on primary
- 17 587 healthcare institutions in Anhui Province. *BMC health services research* 2014;14:268. doi:
- 18 588 10.1186/1472-6963-14-268 [published Online First: 2014/06/20]
- 19 589 38. Ding Y, Smith HJ, Fei Y, et al. Factors influencing the provision of public health services by village
- 20 590 doctors in Hubei and Jiangxi provinces, China. *Bulletin of the World Health Organization*
- 21 591 2013;91(1):64-9. doi: 10.2471/blt.12.109447 [published Online First: 2013/02/12]
- 22 592 39. Zhao Y, Cui S, Yang J, et al. Basic public health services delivered in an urban community: a
- 23 593 qualitative study. *Public health* 2011;125(1):37-45. doi: 10.1016/j.puhe.2010.09.003
- 24 594 [published Online First: 2010/12/15]
- 25 595 40. Zhou H, Zhang W, Zhang S, et al. Health providers' perspectives on delivering public health
- 26 596 services under the contract service policy in rural China: evidence from Xinjian County. *BMC*
- 27 597 *health services research* 2015;15:75. doi: 10.1186/s12913-015-0739-x [published Online First:
- 28 598 2015/04/19]
- 29 599 41. Zhang M, Wang W, Millar R, et al. Coping and compromise: a qualitative study of how primary
- 30 600 health care providers respond to health reform in China. *Human resources for health*
- 31 601 2017;15(1):50. doi: 10.1186/s12960-017-0226-z [published Online First: 2017/08/06]
- 32 602 42. Zhang T, Liu C, Ren J, et al. Perceived impacts of the national essential medicines system: a
- 33 603 cross-sectional survey of health workers in urban community health services in China. *BMJ*
- 34 604 *open* 2017;7(7):e014621. doi: 10.1136/bmjopen-2016-014621 [published Online First:
- 35 605 2017/07/13]
- 36 606 43. Feng D, Zhang L, Xiang YX, et al. Satisfaction of village doctors with the township and village health
- 37 607 services integration policy in the western minority-inhabited areas of China. *Journal of*
- 38 608 *Huazhong University of Science and Technology Medical sciences = Hua zhong ke ji da xue*
- 39 609 *xue bao Yi xue Ying De wen ban = Huazhong keji daxue xuebao Yixue Yingdewen ban*
- 40 610 2017;37(1):11-19. doi: 10.1007/s11596-017-1687-y [published Online First: 2017/02/23]
- 41 611 44. Li T, Lei T, Xie Z, et al. Determinants of basic public health services provision by village doctors in
- 42 612 China: using non-communicable diseases management as an example. *BMC health services*
- 43 613 *research* 2016;16:42. doi: 10.1186/s12913-016-1276-y [published Online First: 2016/02/06]
- 44 614 45. Song Y, Bian Y, Li L. Current perspectives on China's national essential medicine system: primary
- 45 615 care provider and patient views. *BMC health services research* 2016;16:30. doi:
- 46 616 10.1186/s12913-016-1283-z [published Online First: 2016/01/28]

- 1  
2  
3 617 46. Li X, Cochran C, Lu J, et al. Understanding the shortage of village doctors in China and solutions  
4 618 under the policy of basic public health service equalization: evidence from Changzhou. *The*  
5 619 *International journal of health planning and management* 2015;30(1):E42-55. doi:  
6 620 10.1002/hpm.2258 [published Online First: 2014/07/06]  
7  
8 621 47. Chen Q, Yang L, Feng Q. Job Satisfaction Analysis in Rural China: A Qualitative Study of Doctors in a  
9 622 Township Hospital. 2017;2017:1964087. doi: 10.1155/2017/1964087  
10  
11 623 48. Lin WQ, Wu J, Yuan LX, et al. Workplace Violence and Job Performance among Community  
12 624 Healthcare Workers in China: The Mediator Role of Quality of Life. *International journal of*  
13 625 *environmental research and public health* 2015;12(11):14872-86. doi:  
14 626 10.3390/ijerph121114872 [published Online First: 2015/11/28]  
15  
16 627 49. Li X, Liu J, Huang J, et al. An analysis of the current educational status and future training needs of  
17 628 China's rural doctors in 2011. *Postgraduate medical journal* 2013;89(1050):202-8. doi:  
18 629 10.1136/postgradmedj-2012-131094 [published Online First: 2013/02/08]  
19  
20 630 50. Mo Y, Hu G. Unmet needs in health training among nurses in rural Chinese township health  
21 631 centers: a cross-sectional hospital-based study. 2017;14:22. doi: 10.1016/j.ejon.2017.07.003  
22 632 10.3352/jeehp.2017.14.22 [published Online First: 2017/10/17]  
23  
24 633 51. Henderson LN, Tulloch J. Incentives for retaining and motivating health workers in Pacific and  
25 634 Asian countries. *Human resources for health* 2008;6(1):18.  
26  
27 635 52. Global strategy on human resources for health: Workforce 2030. *World Health Organization* 2016  
28 636 doi: [https://www.who.int/hrh/resources/global\\_strategyHRH.pdf](https://www.who.int/hrh/resources/global_strategyHRH.pdf)  
29  
30 637 53. Li T, Lei T, Zheng X, et al. Determinants of basic public health services provision by village doctors  
31 638 in China: using non-communicable diseases management as an example. *BMC health services*  
32 639 *research* 2015;16(1):42.  
33  
34  
35  
36  
37  
38  
39  
40  
41  
42  
43  
44  
45  
46  
47  
48  
49  
50  
51  
52  
53  
54  
55  
56  
57  
58  
59  
60

1  
2  
3  
4 641 **Figure legends**  
5

6  
7 642 **Figure 1.** PRISMA diagram  
8

9 643 **Figure 2.** Job satisfaction score among primary care workers across different regions in China  
10  
11

12 644 **Figure 3.** Forest plot of the job satisfaction score among primary care workers  
13  
14  
15  
16  
17  
18  
19  
20  
21  
22  
23  
24  
25  
26  
27  
28  
29  
30  
31  
32  
33  
34  
35  
36  
37  
38  
39  
40  
41  
42  
43  
44  
45  
46  
47  
48  
49  
50  
51  
52  
53  
54  
55  
56  
57  
58  
59  
60

For peer review only

645 **Tables**646 **Table 2** Means of overall job satisfaction score among primary care workers

| Study                  | No. of included studies | Mean |
|------------------------|-------------------------|------|
| All included studies   | 19                      | 3.30 |
| Studies in urban areas | 9                       | 3.35 |
| Studies in rural areas | 7                       | 3.06 |

647 **Table 1.** Motivating factors for primary care workers

For peer review only



| Motivating factor               | Definition                                                                                                             | Motivation to stay | Motivation to join/leave | Number of selected studies reporting the factors |
|---------------------------------|------------------------------------------------------------------------------------------------------------------------|--------------------|--------------------------|--------------------------------------------------|
| <b>Individual-level factors</b> |                                                                                                                        |                    |                          |                                                  |
| <b>Existence</b>                |                                                                                                                        |                    |                          |                                                  |
| Financial incentives            | Basic salary, bonus, benefits (insurances, vacation, etc.)                                                             | 22                 | 5                        | 26                                               |
| Workload                        | Hours of work, the amount of work done, flexibility in scheduling                                                      | 12                 | 1                        | 13                                               |
| Work conditions                 | Work environment, job stability, job security                                                                          | 14                 | 2                        | 15                                               |
| <b>Relatedness</b>              |                                                                                                                        |                    |                          |                                                  |
| Living environment              | Geographical location and socioeconomic level of workplace                                                             | 4                  | 2                        | 6                                                |
| Recognition in society          | Patients' respect, workplace violence, social status                                                                   | 11                 | 2                        | 13                                               |
| Work itself                     | Nature of work (interest, meaningfulness, enjoyment), job fulfilment, job achievement, work enthusiasm                 | 17                 | 1                        | 17                                               |
| Working relationships           | Relationships with coworkers/subordinates/nurses, communication                                                        | 11                 | 0                        | 11                                               |
| <b>Growth</b>                   |                                                                                                                        |                    |                          |                                                  |
| Career advancement              | Opportunities for professional development                                                                             | 17                 | 3                        | 19                                               |
| Training                        | Support for training and education, opportunity to learn new skills and new knowledge                                  | 11                 | 2                        | 13                                               |
| Rewards                         | Recognition, appreciation, contingent rewards,                                                                         | 9                  | 0                        | 9                                                |
| Management                      | Supervision (level of competence, fairness, interest in subordinates), relationship with superior                      | 8                  | 1                        | 9                                                |
| Autonomy                        | Opportunities to do work by making decisions on their own. opportunity to utilize your professional skills and talents | 14                 | 0                        | 14                                               |
| <b>Macro-level factors</b>      |                                                                                                                        |                    |                          |                                                  |
| <b>System and policy</b>        |                                                                                                                        |                    |                          |                                                  |
| The health-care reform policies | Putting organizational policies into practice e.g. NEMS, NBPHSP and TVHSIM.                                            | 18                 | 1                        | 18                                               |

1  
2  
3  
4  
5  
6  
7  
8  
9  
10  
11  
12  
13  
14  
15  
16  
17  
18  
19  
20  
21  
22  
23  
24  
25  
26  
27  
28  
29  
30  
31  
32  
33  
34  
35  
36  
37  
38  
39  
40  
41  
42  
43  
44  
45  
46

For peer review only

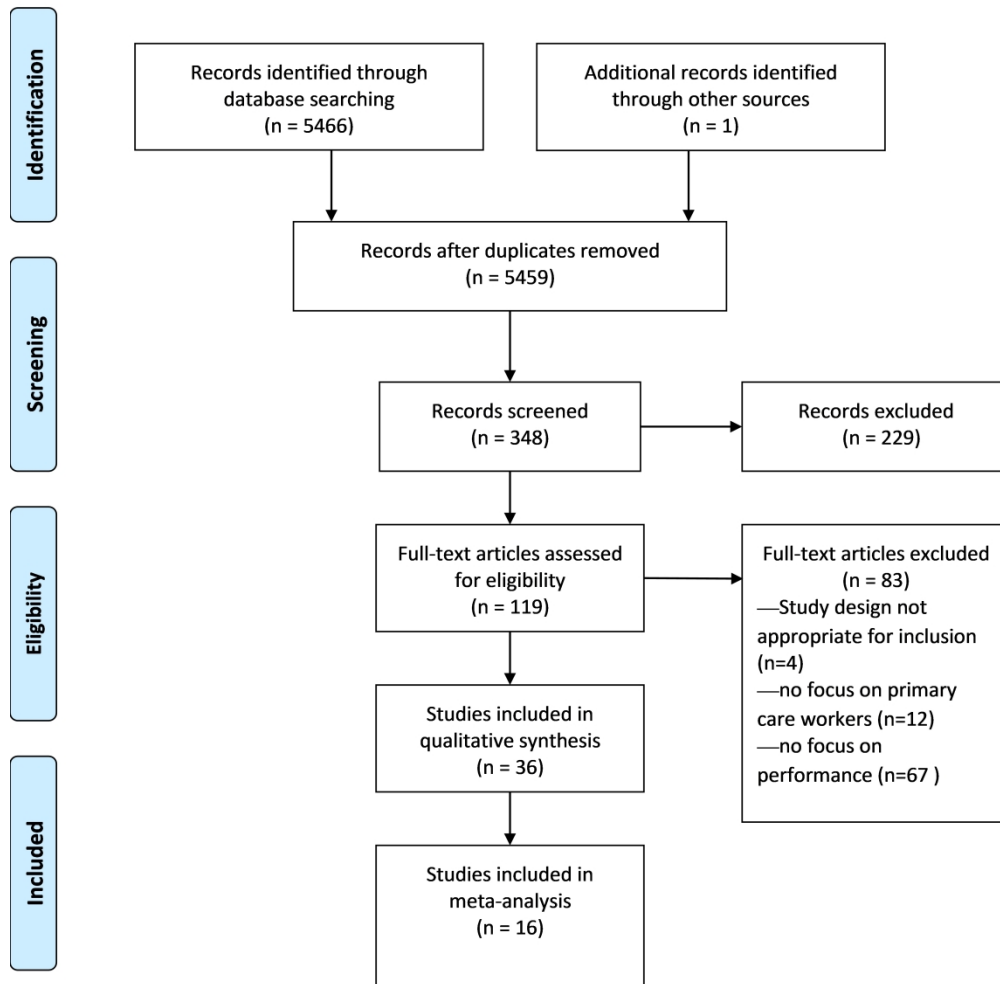

Figure 1. PRISMA diagram

370x397mm (288 x 288 DPI)



1  
2



Figure 3. Forest plot of the Job satisfaction score among primary care workers

333x288mm (288 x 288 DPI)

## Supplementary Appendix

### 1. Search terms

(China[Title/Abstract] OR Chinese[Title/Abstract]) AND ("primary health care"[Mesh] OR "General Practice"[Mesh] OR "General Practitioners"[Mesh] OR "Physicians, Family"[Mesh] OR "Community Health Services"[Mesh] OR "Delivery of Health Care"[Mesh] OR "township hospital"[Title/Abstract] OR "township health center"[Title/Abstract] OR "township health centre"[Title/Abstract] OR "community health station"[Title/Abstract] OR "village clinic"[Title/Abstract] OR "community health center"[Title/Abstract] OR "community health centre"[Title/Abstract]) AND ("manpower"[Mesh] OR "Education, Public Health Professional"[Mesh] OR "Education, Professional"[Mesh] OR "Education, Medical, Continuing"[Mesh] OR "Professionalism"[Mesh] OR "Career Choice"[Mesh] OR "Career Mobility"[Mesh] OR "human resources"[Title/Abstract] OR "retention"[Title/Abstract] OR "incentives"[Title/Abstract] OR "salary"[Title/Abstract] OR "professional medical master"[Title/Abstract] OR Motivation[Mesh] OR "Salaries and Fringe Benefits"[Mesh] OR "Staff Development"[Mesh] OR recruit[Title/Abstract] OR recruited[Title/Abstract] OR recruits[Title/Abstract] OR migration[Title/Abstract] OR migrate[Title/Abstract] OR migrating[Title/Abstract] OR migrated[Title/Abstract] OR migrates[Title/Abstract] OR immigration[Title/Abstract] OR immigrate[Title/Abstract] OR immigrating[Title/Abstract] OR immigrated[Title/Abstract] OR immigrates[Title/Abstract] OR emigration[Title/Abstract] OR emigrate[Title/Abstract] OR emigrating[Title/Abstract] OR emigrated[Title/Abstract] OR emigrates[Title/Abstract] OR mobility[Title/Abstract] OR turnover[Title/Abstract] OR "brain drain"[Title/Abstract]) AND ((eng[Language]) OR chi[Language]) NOT "Autobiography"[ptyp] NOT "Bibliography"[ptyp] NOT "Biography"[ptyp] NOT "Consensus Development Conference"[ptyp] NOT "Consensus Development Conference, NIH"[ptyp] NOT "Corrected and Republished Article"[ptyp] NOT "Dataset"[ptyp] NOT "Dictionary"[ptyp] NOT "Directory"[ptyp] NOT "Duplicate Publication"[ptyp] NOT "Electronic Supplementary Materials"[ptyp] NOT "Festschrift"[ptyp] NOT "Interactive Tutorial"[ptyp] NOT "Legal Cases"[ptyp] NOT "Letter"[ptyp] NOT "News"[ptyp] NOT "Patient Education Handout"[ptyp] NOT "Periodical Index"[ptyp] NOT "Personal Narratives"[ptyp] NOT "Portraits"[ptyp] NOT "Published Erratum"[ptyp] NOT "Retracted Publication"[ptyp] NOT "Retraction of Publication"[ptyp] NOT "Twin Study"[ptyp] NOT "Video-Audio Media"[ptyp] NOT "Webcasts"[ptyp].

2. Preliminary conceptual framework of motivating factors influencing PCW's performance

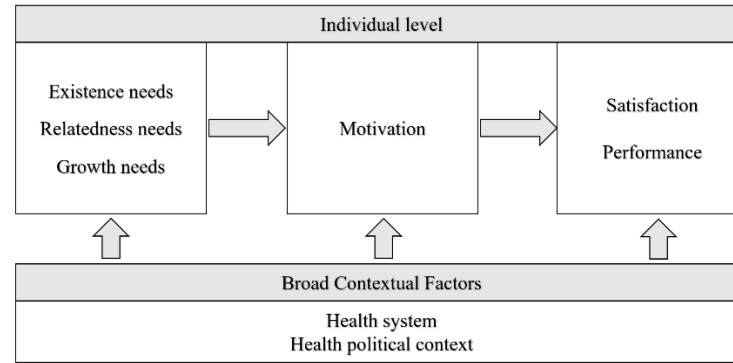

1  
2  
3  
4  
5  
6  
7  
8  
9  
10  
11  
12  
13  
14  
15  
16  
17  
18  
19  
20  
21  
22  
23  
24  
25  
26  
27  
28  
29  
30  
31  
32  
33  
34  
35  
36  
37  
38  
39  
40  
41  
42  
43  
44  
45  
46

3. List of included studies' general characteristics

| Study [Citation]           | Study period  | Study design       | Province  | Area  | Institution             | Objective                                                                                                                                                                          | Key motivation conclusions                                                                                                                                                     | Influencing factors                                                                                                                                                                                                            | Risk of bias |
|----------------------------|---------------|--------------------|-----------|-------|-------------------------|------------------------------------------------------------------------------------------------------------------------------------------------------------------------------------|--------------------------------------------------------------------------------------------------------------------------------------------------------------------------------|--------------------------------------------------------------------------------------------------------------------------------------------------------------------------------------------------------------------------------|--------------|
| Zhang <i>et al.</i> , 2016 | 2014          | Quantitative study | Jiangxi   | Rural | Village Clinic          | To assess village doctors' job satisfaction during the reforms and to explore factors affecting job satisfaction.                                                                  | Low job satisfaction. The top three items leading to dissatisfaction were pay and the amount of work that had to be done, opportunities for job promotion and work conditions. | Marriage, income, intention to leave, satisfaction with learning and training, social status, relationship with patients and satisfaction with the new healthcare reforms were significantly associated with job satisfaction. | Low          |
| Lin <i>et al.</i> , 2015   | 2013.9-2014.4 | Quantitative study | Guangdong | Urban | Community Health Centre | To explore the impact of workplace violence on job performance and quality of life of community healthcare workers in China, especially the relationship of these three variables. | Workplace violence among community healthcare workers is prevalent in China.                                                                                                   | The workplace violence had negative effects on the job performance and quality of life of CHCs' workers.                                                                                                                       | Low          |



| Study [Citation]           | Study period  | Study design       | Province                                               | Area  | Institution                                     | Objective                                                                                                                                                                                | Key motivation conclusions                                                                                                                                                                                                                     | Influencing factors                                                                                                                                                                                                                                             | Risk of bias |
|----------------------------|---------------|--------------------|--------------------------------------------------------|-------|-------------------------------------------------|------------------------------------------------------------------------------------------------------------------------------------------------------------------------------------------|------------------------------------------------------------------------------------------------------------------------------------------------------------------------------------------------------------------------------------------------|-----------------------------------------------------------------------------------------------------------------------------------------------------------------------------------------------------------------------------------------------------------------|--------------|
| Zhang <i>et al.</i> , 2015 | 2013.8-2014.1 | Qualitative Study  | Jiangsu, Henan, Jiangxi, Heilongjiang, Sichuan, Gansu. | Rural | Village Clinic                                  | To investigate the village doctors' income structure and analyze how these health policies influenced it.                                                                                | The health-care reform policies have had lasting impacts on village doctors' income structure since the policies' implementation in 2009.                                                                                                      | Several policies such as the National Essential Medicines System, Integrated management, National Basic Public Health Services, New Rural Cooperative Medical Scheme had major impact on village doctors.                                                       | Moderate     |
| Wu <i>et al.</i> , 2014    | 2012          | Quantitative study | Zhejiang                                               | Both  | Community Health Centre; Township Health Centre | To explore the factors influencing doctors' job satisfaction and morale in China, in the context of the ongoing health system reforms and the deteriorating doctor-patient relationship. | Low job satisfaction. Primary care doctors were the least dissatisfied with the income and opportunities for promotion. Patients were becoming more aggressive in their demands and there was an increasing trend of violence against doctors. | Doctors in the provincial hospital appeared to be the most dissatisfied group, and primary care physicians were most satisfied with their work and the causes of dissatisfaction fall into three main areas: low income, heavy workload and patient aggression. | Low          |

1  
2  
3  
4  
5  
6  
7  
8  
9  
10  
11  
12  
13  
14  
15  
16  
17  
18  
19  
20  
21  
22  
23  
24  
25  
26  
27  
28  
29  
30  
31  
32  
33  
34  
35  
36  
37  
38  
39  
40  
41  
42  
43  
44  
45  
46

| Study [Citation]          | Study period | Study design       | Province     | Area  | Institution             | Objective                                                                                                                                                                                | Key motivation conclusions                                                                                                                                                                                                             | Influencing factors                                                                                                                                                                                                                                                                                                   | Risk of bias |
|---------------------------|--------------|--------------------|--------------|-------|-------------------------|------------------------------------------------------------------------------------------------------------------------------------------------------------------------------------------|----------------------------------------------------------------------------------------------------------------------------------------------------------------------------------------------------------------------------------------|-----------------------------------------------------------------------------------------------------------------------------------------------------------------------------------------------------------------------------------------------------------------------------------------------------------------------|--------------|
| Li <i>et al.</i> , 2014   | 2012         | Quantitative study | Heilongjiang | Urban | Community Health Centre | To assess the determinants of job satisfaction in community health workers in one Chinese province.                                                                                      | Overall job satisfaction was higher than extrinsic job satisfaction and lower than intrinsic job satisfaction. All desired workplace characteristics were higher than the associated actual workplace characteristics.                 | The main determinants of job satisfaction were occupation, years worked in health service institution, and five subscales representing the gap between desired and actual workplace characteristics, which were system and policy; fringe benefits; working relationship; professional development; and remuneration. | Low          |
| Fang <i>et al.</i> , 2014 | 2012.07-08   | Quantitative study | Hubei        | Rural | Village Clinic          | To analyzes the factors that influence the turnover intention of village doctors by investigating village clinic workers in rural areas, particularly in Xiangyang City, Hubei Province. | Village doctors were most dissatisfied with my pay and the amount of work I do, the chances for advancement on this job, and the work conditions. Highlight the influence of job satisfaction on turnover intention of village doctors | Income satisfaction, the way organization policies are put into practice, my pay and the amount of work I do, the chances for advancement on this job and the work conditions were significantly related to the turnover intention of village doctors.                                                                | Low          |

| Study [Citation]          | Study period | Study design      | Province         | Area  | Institution            | Objective                                                                                                                                                         | Key motivation conclusions                                                                                                                                                                                                                                                                                                                                                                                                                                                                                                                    | Influencing factors                                                                                                                                                                                                             | Risk of bias |
|---------------------------|--------------|-------------------|------------------|-------|------------------------|-------------------------------------------------------------------------------------------------------------------------------------------------------------------|-----------------------------------------------------------------------------------------------------------------------------------------------------------------------------------------------------------------------------------------------------------------------------------------------------------------------------------------------------------------------------------------------------------------------------------------------------------------------------------------------------------------------------------------------|---------------------------------------------------------------------------------------------------------------------------------------------------------------------------------------------------------------------------------|--------------|
| Zhou <i>et al.</i> , 2014 | 2013.1-3     | Qualitative Study | Zhejiang, Yunnan | Rural | Township Health Centre | To explore the impacts of these reforms on health workers and service users at township level, which has been the major target of the first phase of the reforms. | Some elements of the reforms may actually be undermining primary care. While the new health insurance system was popular among service-users, it was criticized for contributing to fast-growing medical costs, and for an imbalance of benefits between outpatient and inpatient services. Salary reform has guaranteed health workers' income, but greatly reduced their incentives. The essential drug list removed perverse incentives to overprescribe, but led to falls in income for health workers, and loss of autonomy for doctors. | The health workers' intention was mostly blamed on the loss of income and incentives and in the larger hospitals, on the essential drug list, and the way it limits clinical autonomy and the provision of specialist services. | Low          |

1  
2  
3  
4  
5  
6  
7  
8  
9  
10  
11  
12  
13  
14  
15  
16  
17  
18  
19  
20  
21  
22  
23  
24  
25  
26  
27  
28  
29  
30  
31  
32  
33  
34  
35  
36  
37  
38  
39  
40  
41  
42  
43  
44  
45  
46

| Study [Citation]         | Study period | Study design       | Province | Area | Institution                                                              | Objective                                                                                  | Key motivation conclusions                                                                                                                                                                                                                                                                                                                                                                                                                                                                          | Influencing factors                                                                                                                                            | Risk of bias |
|--------------------------|--------------|--------------------|----------|------|--------------------------------------------------------------------------|--------------------------------------------------------------------------------------------|-----------------------------------------------------------------------------------------------------------------------------------------------------------------------------------------------------------------------------------------------------------------------------------------------------------------------------------------------------------------------------------------------------------------------------------------------------------------------------------------------------|----------------------------------------------------------------------------------------------------------------------------------------------------------------|--------------|
| Liu <i>et al.</i> , 2014 | 2009-2010    | Mixed method study | Anhui    | Both | Township Health Centre; Village Clinic; Community Health Centre/ Station | To conduct an initial assessment of the effects of specific parts of the reforms in Anhui. | The reform of primary healthcare institutions in Anhui has improved the personnel structures surrounding frontline healthcare workers, increased their incomes, improved work efficiency, and changed the compensation patterns of primary healthcare institutions, improved hardware, reduced drug prices, and, to some extent, improved the diagnosis and treatment structure. However, the reforms have not radically changed the behavior of medical workers or the visit patterns of patients. | Two problems emerged from the reforms. First, the enthusiasm of medical staff decreased, and second, the supply of drugs could not adequately meet the demand. | Moderate     |

| Study [Citation]         | Study period | Study design       | Province                                                  | Area  | Institution             | Objective                                                                                                                                              | Key motivation conclusions                                                                                                                                                                                                                             | Influencing factors                                                                                                                                                                                                                                                                      | Risk of bias |
|--------------------------|--------------|--------------------|-----------------------------------------------------------|-------|-------------------------|--------------------------------------------------------------------------------------------------------------------------------------------------------|--------------------------------------------------------------------------------------------------------------------------------------------------------------------------------------------------------------------------------------------------------|------------------------------------------------------------------------------------------------------------------------------------------------------------------------------------------------------------------------------------------------------------------------------------------|--------------|
| Luo <i>et al.</i> , 2014 | maybe 2012   | Quantitative study | Hubei ,<br>Guizhou,<br>Hebei ,<br>Guangdong ,<br>Zhejiang | Urban | Community Health Centre | To analyze and determine the main related factors that influence work passion of CHS workers by investigating CHS workers from five Chinese provinces. | Low passion for current work.<br>Workers were most dissatisfied with the balance between remuneration and workload, job promotion opportunities and most dissatisfied with the balance between remuneration and workload, job promotion opportunities. | The related factors that influence CHS workers' work passion are socio-demographic factors such as age, and years of employment, and other work-related factors such as learning and training opportunities, compensation packages, work stress, and personal development opportunities. | Moderate     |

1  
2  
3  
4  
5  
6  
7  
8  
9  
10  
11  
12  
13  
14  
15  
16  
17  
18  
19  
20  
21  
22  
23  
24  
25  
26  
27  
28  
29  
30  
31  
32  
33  
34  
35  
36  
37  
38  
39  
40  
41  
42  
43  
44  
45  
46

| Study [Citation]          | Study period   | Study design       | Province | Area  | Institution             | Objective                                                                                                                                                                                                                                   | Key motivation conclusions                                                                                                                                                                                | Influencing factors                                                                                                                                                                                                                                                                                                                                                                      | Risk of bias |
|---------------------------|----------------|--------------------|----------|-------|-------------------------|---------------------------------------------------------------------------------------------------------------------------------------------------------------------------------------------------------------------------------------------|-----------------------------------------------------------------------------------------------------------------------------------------------------------------------------------------------------------|------------------------------------------------------------------------------------------------------------------------------------------------------------------------------------------------------------------------------------------------------------------------------------------------------------------------------------------------------------------------------------------|--------------|
| Ding <i>et al.</i> , 2013 | 2009 v.s. 2012 | Quantitative study | Anhui    | Urban | Community Health Centre | To compare the job satisfaction (JS) of community health workers (CHWs) before and after the local comprehensive medical care reform (LCMR) in Anhui Province to provide evidence for improving the LCMR policy to increase the JS of CHWs. | After two years' implementation of the LCMR, CHWs' total JS have a small improvement. CHWs have lower satisfaction in the dimensions of pay, promotion and benefits dimensions before and after the LCMR. | The average scores of total JS and satisfaction with pay, contingent rewards, operating procedures and communication in the effect evaluation survey were statistically significantly higher than those of the baseline survey. The average score of satisfaction with promotion in the effect evaluation survey was statistically significantly lower than that in the baseline survey. | Low          |

For peer review only

| Study [Citation]          | Study period | Study design       | Province                                       | Area  | Institution                                                              | Objective                                                                                                                                                                                                     | Key motivation conclusions                                                                                                                                                                                                                     | Influencing factors                                                                                                                                                                                                                                                                                                  | Risk of bias |
|---------------------------|--------------|--------------------|------------------------------------------------|-------|--------------------------------------------------------------------------|---------------------------------------------------------------------------------------------------------------------------------------------------------------------------------------------------------------|------------------------------------------------------------------------------------------------------------------------------------------------------------------------------------------------------------------------------------------------|----------------------------------------------------------------------------------------------------------------------------------------------------------------------------------------------------------------------------------------------------------------------------------------------------------------------|--------------|
| Hung <i>et al.</i> , 2013 | 2011         | Quantitative study | Jilin, Shandong, Anhui, Chongqing, Ningxia     | Both  | Township Health Centre; Village Clinic; Community Health Centre/ Station | To provide an overview of major performance motivating factors for primary care providers (PCPs) in China and examine associations between these factors and individual and practice setting characteristics. | There were greater needs for improvement in rural than urban settings, especially in living environment. Types of PCPs were associated with needs for improvement in different factors. There were more needs from nurses and village doctors. | The most important motivating factors for PCPs to improve performance were professional development, training opportunities, living environment, benefits, working conditions and income.                                                                                                                            | Low          |
| Sun <i>et al.</i> , 2013  | Maybe 2012   | Quantitative study | Zhejiang, Guangdong, Guizhou, Hebei, and Hubei | Urban | Community Health Centre                                                  | To ascertain the key factors that influence the CHS worker turnover intention to increase their work satisfaction and stability.                                                                              | 38.7 % community health workers intended to quit. CHS workers were less satisfied with the balance between payment and work quantity, promotion opportunity, and working conditions.                                                           | The influencing factors that result in turnover intention are socio-demographic factors such as age, post of duty, professional title, and working seniority, and other work-related factors such as pay packets, learning and training opportunities, promotion and personal development space, and working stress. |              |

1  
2  
3  
4  
5  
6  
7  
8  
9  
10  
11  
12  
13  
14  
15  
16  
17  
18  
19  
20  
21  
22  
23  
24  
25  
26  
27  
28  
29  
30  
31  
32  
33  
34  
35  
36  
37  
38  
39  
40  
41  
42  
43  
44  
45  
46

| Study [Citation]          | Study period | Study design       | Province       | Area  | Institution                            | Objective                                                                                                                              | Key motivation conclusions                                                                                                                                                                                                                                                                                                                                                                                  | Influencing factors                                                                                                                                                                                                                                                                                                                                                                | Risk of bias |
|---------------------------|--------------|--------------------|----------------|-------|----------------------------------------|----------------------------------------------------------------------------------------------------------------------------------------|-------------------------------------------------------------------------------------------------------------------------------------------------------------------------------------------------------------------------------------------------------------------------------------------------------------------------------------------------------------------------------------------------------------|------------------------------------------------------------------------------------------------------------------------------------------------------------------------------------------------------------------------------------------------------------------------------------------------------------------------------------------------------------------------------------|--------------|
| Ding <i>et al.</i> , 2013 | 2011.3-6     | Quantitative study | Hubei, Jiangxi | Rural | Township Health Centre; Village Clinic | To improve the early detection of epidemics in rural China by integrating syndromic surveillance with the existing case report system. | Village doctors prioritize medical services but they do their best to manage their time to include public health services. The willingness of township health centre directors and village doctors to provide public health services has improved since the introduction of the package and a minimum subsidy, but village doctors do not find the subsidy to be sufficient remuneration for their efforts. | Factors to consider in future activities to improve the quality and extent of public health services provided by village doctors include actual and potential sources of village doctor income (i.e. medical services, social pension and other government support), the relationship between village clinics and township health centres and the amount of public health subsidy. | Moderate     |

For peer review only



| Study [Citation]         | Study period    | Study design       | Province                                                                             | Area  | Institution                                                             | Objective                                                                                                                                                                         | Key motivation conclusions                                                                                                                                                                                                                                            | Influencing factors                                                                                                                                                                                                                                                | Risk of bias |
|--------------------------|-----------------|--------------------|--------------------------------------------------------------------------------------|-------|-------------------------------------------------------------------------|-----------------------------------------------------------------------------------------------------------------------------------------------------------------------------------|-----------------------------------------------------------------------------------------------------------------------------------------------------------------------------------------------------------------------------------------------------------------------|--------------------------------------------------------------------------------------------------------------------------------------------------------------------------------------------------------------------------------------------------------------------|--------------|
| Li <i>et al.</i> , 2013  | 2009.12-2010.12 | Quantitative study | Beijing, Jiangsu, Zhejiang, Hainan, Guangxi, Shanxi, Jiangxi, Guizhou, Yunnan, Gansu | Rural | Township Health Centre; Village Clinic                                  | To analyze the educational status and future training needs of China's rural doctors and provide a basis to improve their future training.                                        | Rural health professionals in China who have relatively low healthcare education should be focused on. Rural doctors the training status and needs of China's rural doctors are still disjointed in terms of the training time, training method and training content. | Rural doctors wanted to extend the training time, preferred to practice-focused training (on-site guidance from senior doctors, clinical further education), and had greater desire for clinical skills, preventive healthcare and medication knowledge education. | Low          |
| Shi <i>et al.</i> , 2014 | 2011            | Quantitative study | 5 provinces representing Eastern, Central, and Western China                         | Both  | Township Health Centre; Village Clinic; Community Health Centre/Station | To provide a snapshot of the current state of primary care workforce (PCW) serving China's grassroots communities and examine the factors associated with their job satisfaction. | Low job satisfaction PCW are least satisfied with their income level (only 8.6% are either satisfied or very satisfied), benefits (12.8%), and professional development (19.5%).                                                                                      | Lower income and higher workload are the two major contributing factors toward job dissatisfaction.                                                                                                                                                                | Moderate     |

1  
2  
3  
4  
5  
6  
7  
8  
9  
10  
11  
12  
13  
14  
15  
16  
17  
18  
19  
20  
21  
22  
23  
24  
25  
26  
27  
28  
29  
30  
31  
32  
33  
34  
35  
36  
37  
38  
39  
40  
41  
42  
43  
44  
45  
46

| Study [Citation]          | Study period     | Study design       | Province | Area  | Institution             | Objective                                                                                                                                                                                        | Key motivation conclusions                                                                                                                         | Influencing factors                                                                                                                                                                                                                                                                                                   | Risk of bias |
|---------------------------|------------------|--------------------|----------|-------|-------------------------|--------------------------------------------------------------------------------------------------------------------------------------------------------------------------------------------------|----------------------------------------------------------------------------------------------------------------------------------------------------|-----------------------------------------------------------------------------------------------------------------------------------------------------------------------------------------------------------------------------------------------------------------------------------------------------------------------|--------------|
| Ge <i>et al.</i> , 2011   | 2009.12 -2010.2  | Quantitative study | Liaoning | Urban | Community Health Centre | To clarify the level of job satisfaction of Chinese community health workers between a metropolitan (Shenyang) and a small city (Benxi) in Liaoning province and explore its associated factors. | A moderate level of job satisfactions. Community health workers in a metropolitan had lower job satisfaction as compared to those in a small city. | Three significant predictors of intrinsic and extrinsic job satisfactions were the two dimensions (social support and decision latitude) of stress and cynicism of burnout.                                                                                                                                           | Low          |
| Zhao <i>et al.</i> , 2011 | 2008.12 - 2009.2 | Qualitative study  | Beijing  | Urban | Community Health Centre | To understand the advancements in and barriers to the implementation of measures to improve basic public health services in an urban Chinese community.                                          | The number of practitioners and their low levels of skill were insufficient to provide adequate services for community residents.                  | Due to the broad scope of basic public health services and limited financial incentives, providers felt that they were under great stress and often complained that community members for whom they were responsible did not trust them as these clinicians had lower levels of knowledge and skill than specialists. | Moderate     |

| Study [Citation]         | Study period | Study design       | Province        | Area  | Institution            | Objective                                                                                                                                                                                                                | Key motivation conclusions                                                                                                                                                                                 | Influencing factors                                                                                                                                                                             | Risk of bias |
|--------------------------|--------------|--------------------|-----------------|-------|------------------------|--------------------------------------------------------------------------------------------------------------------------------------------------------------------------------------------------------------------------|------------------------------------------------------------------------------------------------------------------------------------------------------------------------------------------------------------|-------------------------------------------------------------------------------------------------------------------------------------------------------------------------------------------------|--------------|
| Liu <i>et al.</i> , 2010 | 2007         | Quantitative study | Anhui, Xinjiang | Rural | Township Health Centre | To measure job satisfaction level of THC employees in poor rural China and to identify relevant features in order to provide policy advice on human resource development of health service institutions in poor regions. | Moderate job satisfactions in poor areas. Job satisfaction scores reflecting job significance, job competency and team work were highest, while work conditions and atmosphere and job reward were lowest. | Township health centers employees are more satisfied with the work significance and cooperation with colleagues, while less satisfied with work conditions, reward and promotion opportunities. | Low          |

1  
2  
3  
4  
5  
6  
7  
8  
9  
10  
11  
12  
13  
14  
15  
16  
17  
18  
19  
20  
21  
22  
23  
24  
25  
26  
27  
28  
29  
30  
31  
32  
33  
34  
35  
36  
37  
38  
39  
40  
41  
42  
43  
44  
45  
46

| Study [Citation]              | Study period | Study design      | Province | Area  | Institution                            | Objective                                                                                                                                                                                         | Key motivation conclusions                                                                                                                                                                  | Influencing factors                                                                                                                                                                                                                                                                  | Risk of bias |
|-------------------------------|--------------|-------------------|----------|-------|----------------------------------------|---------------------------------------------------------------------------------------------------------------------------------------------------------------------------------------------------|---------------------------------------------------------------------------------------------------------------------------------------------------------------------------------------------|--------------------------------------------------------------------------------------------------------------------------------------------------------------------------------------------------------------------------------------------------------------------------------------|--------------|
| Zhou <i>et al.</i> , 2015 Feb | 2013         | Qualitative Study | Jiangxi  | Rural | Township Health Centre; Village Clinic | To explore the perspectives of health providers on the contract service policy, and investigate the demand side’s attitude toward the public health services delivered under the contract policy. | The contract service actually promoted the supply side to provide more public health services to the villagers and contracted patients felt satisfied with the doctor-patient relationship. | Most health providers complained about the heavy workload, insufficient remuneration, staff shortage, lack of official identity and ineffective performance appraisal, in addition to contempt from some villagers and supervisors after the implementation of the contract service. | Moderate     |

For peer review only

| Study [Citation]          | Study period | Study design       | Province | Area  | Institution                            | Objective                                                                                                            | Key motivation conclusions                                                                                                                                                                                                | Influencing factors                                                                                                                                                                                                                                                                                                   | Risk of bias |
|---------------------------|--------------|--------------------|----------|-------|----------------------------------------|----------------------------------------------------------------------------------------------------------------------|---------------------------------------------------------------------------------------------------------------------------------------------------------------------------------------------------------------------------|-----------------------------------------------------------------------------------------------------------------------------------------------------------------------------------------------------------------------------------------------------------------------------------------------------------------------|--------------|
| Chen <i>et al.</i> , 2015 | 2012.5-7     | Mixed method study | Jiangsu  | Rural | Township Health Centre; Village Clinic | To reveal the challenges of village doctors' survival and training in economically developed areas in eastern China. | The main challenges in Changzhou include an insufficient amount of village doctors, difficulties in obtaining professional qualification for village doctors, low salaries and benefits, and difficulties in recruitment. | The gap between expected and actual income is the primary factor affecting the attractiveness of a career as a village doctor. Changes to training have influenced the stability of village doctor teams. Declining attachment of young people to their hometown village has contributed to recruitment difficulties. | Moderate     |
| Wang <i>et al.</i> , 2013 | 2009.9-11    | Quantitative study | Beijing  | Rural | Village Clinic                         | To explore the reasons for the poor recruitment and to propose possible strategies to improve the situation.         | Rural doctors were generally older than average and considered the training strategy to be inadequate in in China.                                                                                                        | In general, the initiatives identified by rural doctors as being of most value in the recruitment of doctors were those targeting retirement pension and income.                                                                                                                                                      | Moderate     |

1  
2  
3  
4  
5  
6  
7  
8  
9  
10  
11  
12  
13  
14  
15  
16  
17  
18  
19  
20  
21  
22  
23  
24  
25  
26  
27  
28  
29  
30  
31  
32  
33  
34  
35  
36  
37  
38  
39  
40  
41  
42  
43  
44  
45  
46

| Study [Citation]        | Study period | Study design       | Province                   | Area  | Institution    | Objective                                                                                                                       | Key motivation conclusions                                                                                                                                                                             | Influencing factors                                                                                                                                                                                                                                                                                                                                                                                | Risk of bias |
|-------------------------|--------------|--------------------|----------------------------|-------|----------------|---------------------------------------------------------------------------------------------------------------------------------|--------------------------------------------------------------------------------------------------------------------------------------------------------------------------------------------------------|----------------------------------------------------------------------------------------------------------------------------------------------------------------------------------------------------------------------------------------------------------------------------------------------------------------------------------------------------------------------------------------------------|--------------|
| Li <i>et al.</i> , 2017 | 2014-4       | Mixed method study | Shandong, Guangxi, Shaanxi | Rural | Village Clinic | To describe village doctors' job satisfaction under the context of health sector reform and investigate the associated factors. | Low job satisfaction. Village doctors who earned the top level of monthly income felt more satisfied, while on the county level, those who lived in counties with the highest GDP felt less satisfied. | From interviews, most workers believed that age, income, and integrated management had a positive influence on the job satisfaction, while pension plan and basic public health care policies exhibited negative effects. Also, the increasing in availability of healthcare and health resources along with local economic development had negative effects on village doctors' job satisfaction. | Low          |

For peer review only

| Study [Citation]           | Study period   | Study design       | Province                           | Area  | Institution             | Objective                                                                                                                                                          | Key motivation conclusions                                                                                                                                                                                   | Influencing factors                                                                                                                                                                                                                     | Risk of bias |
|----------------------------|----------------|--------------------|------------------------------------|-------|-------------------------|--------------------------------------------------------------------------------------------------------------------------------------------------------------------|--------------------------------------------------------------------------------------------------------------------------------------------------------------------------------------------------------------|-----------------------------------------------------------------------------------------------------------------------------------------------------------------------------------------------------------------------------------------|--------------|
| Zhang <i>et al.</i> , 2017 | 2013           | Quantitative study | Shanghai, Shaanxi, Shandong, Anhui | Urban | Community Health Centre | To examine the mediation effect of job satisfaction on the relationship between person-organization fit (P-O fit) and turnover intention based on data from China. | The effect of P-O fit on turnover intention was partially mediated through job satisfaction.                                                                                                                 | P-O fit was directly related to job satisfaction and inversely related to turnover intention.                                                                                                                                           | Low          |
| Li <i>et al.</i> , 2014    | 2013.3.1-10.31 | Quantitative study | Heilongjiang                       | Urban | Community Health Centre | To examine levels of work stress and motivation and their contribution to job satisfaction among community health workers in Heilongjiang Province, China.         | Levels of overall motivation perception and scores on the career development, responsibility and recognition motivation subscales were higher in satisfied respondents relative to dissatisfied respondents. | The main determinants of job satisfaction were occupation; age; title; income; the career development, and wages and benefits subscales of work stress; and the recognition, responsibility and financial subscales of work motivation. | Low          |

1  
2  
3  
4  
5  
6  
7  
8  
9  
10  
11  
12  
13  
14  
15  
16  
17  
18  
19  
20  
21  
22  
23  
24  
25  
26  
27  
28  
29  
30  
31  
32  
33  
34  
35  
36  
37  
38  
39  
40  
41  
42  
43  
44  
45  
46

| Study [Citation]          | Study period | Study design       | Province                 | Area  | Institution                                     | Objective                                                                                                              | Key motivation conclusions                                                                                                                                                                                                                      | Influencing factors                                                                                                            | Risk of bias |
|---------------------------|--------------|--------------------|--------------------------|-------|-------------------------------------------------|------------------------------------------------------------------------------------------------------------------------|-------------------------------------------------------------------------------------------------------------------------------------------------------------------------------------------------------------------------------------------------|--------------------------------------------------------------------------------------------------------------------------------|--------------|
| Meng <i>et al.</i> , 2009 | 2006         | Qualitative Study  | 10 provinces             | Both  | Township Health Centre; Community Health Centre | To analyze the mobility of health workers in township and community health centres.                                    | Increased rate of workers leaving township and community health centres between 2000 and 2005, with the majority of the mobile health workers moving to higher-level health facilities; very few moving to other rural township health centres. | The main reasons for leaving were low salaries, limited opportunities for professional development and poor living conditions. | Moderate     |
| Wang <i>et al.</i> , 2017 | 2013         | Quantitative study | Shandong, Anhui, Shaanxi | Rural | Township Health Centre                          | To investigate the association between the latent clusters and health-care staff's personal and professional features. | The minority of health-care staff belong to the "satisfied class". Three among four subgroups are not satisfied with income, benefit, training, and career development.                                                                         | Low job satisfaction was associated with specialty, training opportunity, and income inequality.                               | Low          |



| Study [Citation]  | Study period | Study design      | Province | Area  | Institution            | Objective                                                                             | Key motivation conclusions                                                                                                                                                                                                                                    | Influencing factors                                                                                                                         | Risk of bias |
|-------------------|--------------|-------------------|----------|-------|------------------------|---------------------------------------------------------------------------------------|---------------------------------------------------------------------------------------------------------------------------------------------------------------------------------------------------------------------------------------------------------------|---------------------------------------------------------------------------------------------------------------------------------------------|--------------|
| Chen et al., 2017 | After 2009   | Qualitative study | Guangxi  | Rural | Township Health Centre | To understand the level of job satisfaction as felt by primary health care providers. | Increasing the incomes and fringe benefits of healthcare workers, improving their work conditions, and providing training and continuing education opportunities would help rural clinics retain doctors and eliminate the current unsatisfactory conditions. | The main concerns related to job satisfaction included working conditions, financial rewards, and the doctor's relationships with patients. | Moderate     |

1  
2  
3  
4  
5  
6  
7  
8  
9  
10  
11  
12  
13  
14  
15  
16  
17  
18  
19  
20  
21  
22  
23  
24  
25  
26  
27  
28  
29  
30  
31  
32  
33  
34  
35  
36  
37  
38  
39  
40  
41  
42  
43  
44  
45  
46

| Study [Citation] | Study period | Study design       | Province  | Area | Institution                                                              | Objective                                                                                                                                                                                                                                       | Key motivation conclusions                                                                                                                                                                                                                                  | Influencing factors                                                                                                                                                                                                                                                                    | Risk of bias |
|------------------|--------------|--------------------|-----------|------|--------------------------------------------------------------------------|-------------------------------------------------------------------------------------------------------------------------------------------------------------------------------------------------------------------------------------------------|-------------------------------------------------------------------------------------------------------------------------------------------------------------------------------------------------------------------------------------------------------------|----------------------------------------------------------------------------------------------------------------------------------------------------------------------------------------------------------------------------------------------------------------------------------------|--------------|
| Lu et al., 2016  | 2013         | Quantitative study | Guangdong | Both | Township Health Centre; Village Clinic; Community Health Centre/ Station | To explore job satisfaction among healthcare staff in Guangdong following the health system reforms in 2009, and to investigate the association between job satisfaction and work stress, work–family conflict and doctor–patient relationship. | The overall job satisfaction exceeded slightly dissatisfied and approached slightly satisfied. Measures to enhance job satisfaction include the reduction of workload, increase of welfare, maintaining moderate stress and balancing work–family conflict. | The sociodemographic variables including occupation, educational background, professional status, years of service, annual income and night shift, work stress, work–family conflict and doctor–patient relationship frequency significantly influenced the level of job satisfaction. | Low          |

For peer review only

| Study [Citation]  | Study period | Study design       | Province                                   | Area  | Institution                                     | Objective                                                                                                                                                                        | Key motivation conclusions                                                                                                                                                                                                                          | Influencing factors                                                                                                                                                                     | Risk of bias |
|-------------------|--------------|--------------------|--------------------------------------------|-------|-------------------------------------------------|----------------------------------------------------------------------------------------------------------------------------------------------------------------------------------|-----------------------------------------------------------------------------------------------------------------------------------------------------------------------------------------------------------------------------------------------------|-----------------------------------------------------------------------------------------------------------------------------------------------------------------------------------------|--------------|
| Song et al., 2015 | 2011         | Quantitative study | Jilin, Shandong, Anhui, Chongqing, Shaanxi | Both  | Township Health Centre; Community Health Centre | To find out which job attributes affect Chinese primary care providers' choice of job and whether there are any differences in these job preferences between doctors and nurses. | Policymakers need to improve primary care providers' income, benefits and working conditions to fulfil their basic needs, invest in infrastructure and strengthen training programmes in order to raise the community's confidence in the services. | Though income was important, Chinese primary care providers also had strong preferences for sufficient welfare benefits, sufficient essential equipment and respect from the community. | Low          |
| Mo et al., 2017   | 2014         | Quantitative study | Guangxi                                    | Rural | Township Health Centre                          | To explore the current health training status of nurses working in rural Chinese township health centers and to ascertain their perceived needs.                                 | A decentralized degree-linked training program in which medical universities and city hospitals collaborate would be an appropriate mode of delivery.                                                                                               | Mismatch between current health training initiatives and desired programs in terms of training setting, content, and delivery mode                                                      | Moderate     |

1  
2  
3  
4  
5  
6  
7  
8  
9  
10  
11  
12  
13  
14  
15  
16  
17  
18  
19  
20  
21  
22  
23  
24  
25  
26  
27  
28  
29  
30  
31  
32  
33  
34  
35  
36  
37  
38  
39  
40  
41  
42  
43  
44  
45  
46

| Study [Citation]   | Study period | Study design       | Province                             | Area  | Institution                      | Objective                                                                                                                   | Key motivation conclusions                                                                                                                              | Influencing factors                                                                                                                                                                                                                 | Risk of bias |
|--------------------|--------------|--------------------|--------------------------------------|-------|----------------------------------|-----------------------------------------------------------------------------------------------------------------------------|---------------------------------------------------------------------------------------------------------------------------------------------------------|-------------------------------------------------------------------------------------------------------------------------------------------------------------------------------------------------------------------------------------|--------------|
| Zhang et al., 2017 | 2013         | Qualitative Study  | Shandong                             | Urban | Community Health Centre/ Station | To analyze how health reform of CHS led to changing job features for primary health providers.                              | The new model of primary health care significantly affected the nature of primary health work and triggered a range of PHC providers' coping processes. | Health workers perceived their job as less intensive than hospital medical work but often more trivial, characterized by heavy workload, blurred job description, unsatisfactory income, and a lack of professional development.    | Moderate     |
| Zhang et al., 2017 | 2014         | Quantitative study | Zhejiang, Jiangxi, Shaanxi, Xinjiang | Urban | Community Health Centre          | To investigate the perceptions of primary care workers about the impacts of the national essential medicines policy (NEMP). | The NEMP has significant impacts (as perceived by the health workers) on health services delivery in primary care settings.                             | The impacts of the NEMP vary by region, professional practice and the income level of health workers. It is important to maintain support from physicians through income subsidies (to compensate for potential loss) and training. | Moderate     |

| Study [Citation]  | Study period | Study design       | Province                          | Area  | Institution    | Objective                                                                                                                                           | Key motivation conclusions                                                                                                                                                              | Influencing factors                                                                                                                                                                                                                                                                                 | Risk of bias |
|-------------------|--------------|--------------------|-----------------------------------|-------|----------------|-----------------------------------------------------------------------------------------------------------------------------------------------------|-----------------------------------------------------------------------------------------------------------------------------------------------------------------------------------------|-----------------------------------------------------------------------------------------------------------------------------------------------------------------------------------------------------------------------------------------------------------------------------------------------------|--------------|
| Feng et al., 2017 | 2014         | Quantitative study | Qinghai, Inner Mongolia, Xinjiang | Rural | Village Clinic | To examine the satisfaction of village doctors with the Township and Village Health Services Integration Management (TVHSIM).                       | Low satisfaction with the TVHSIM. A well-rounded social insurance model for village doctors is urgently needed and enhancing essential medical training should be carefully considered. | Social insurance, essential medical knowledge, year of practice significantly influenced satisfaction of village doctors on human resources management, drug and medical device management, and financing management.                                                                               | Low          |
| Li et al., 2016   | 2014         | Quantitative study | Shandong, Guangxi, Shaanxi        | Rural | Village Clinic | To identify factors associated with village doctors' basic public health services provision and to formulate targeted interventions in rural China. | There is considerable room for improvement regarding the factors associated with village doctors' basic public health services provision.                                               | Increasing public health care subsidies received by individual village doctors, availability and attendance of training opportunities, and integrated management and NCMS contracting of village clinics are important factors in increasing basic public health services provision in rural areas. | Low          |

1  
2  
3  
4  
5  
6  
7  
8  
9  
10  
11  
12  
13  
14  
15  
16  
17  
18  
19  
20  
21  
22  
23  
24  
25  
26  
27  
28  
29  
30  
31  
32  
33  
34  
35  
36  
37  
38  
39  
40  
41  
42  
43  
44  
45  
46

| <b>Study [Citation]</b> | <b>Study period</b> | <b>Study design</b> | <b>Province</b> | <b>Area</b> | <b>Institution</b>         | <b>Objective</b>                                                                                                                           | <b>Key motivation conclusions</b>                                                                                                          | <b>Influencing factors</b>                                                                                                                                                                                                                  | <b>Risk of bias</b> |
|-------------------------|---------------------|---------------------|-----------------|-------------|----------------------------|--------------------------------------------------------------------------------------------------------------------------------------------|--------------------------------------------------------------------------------------------------------------------------------------------|---------------------------------------------------------------------------------------------------------------------------------------------------------------------------------------------------------------------------------------------|---------------------|
| Song et al., 2016       | 2011                | Quantitative study  | Ningxia         | Both        | Primary healthcare centers | To examine current understanding and opinions of China’s National Essential Medicine System (NEMS) of primary care providers and patients. | High level of satisfaction towards NEMS among primary care providers, which is a reflection of the improvements in the health care system. | Overall there was a link between knowledge about NEMS and satisfaction with the program: the providers with greater knowledge of NEMS, reported higher satisfaction.                                                                        | Moderate            |
| Li et al., 2015         | 2012                | Mixed method study  | Jiangsu         | Rural       | Village Clinic             | To identify specific factors of and potential solutions to the shortage in village doctors.                                                | The shortage in village doctors presents a major obstacle toward the realization of China’s policy of public health service equalization.  | Many factors associated with the shortage of village doctors were payment related including low salaries and bonuses, heavy workload, few opportunities for continuing education, unattractive pension plans and poor working environments. | Moderate            |

4. A logical diagram of motivating factors influencing PCW's performance

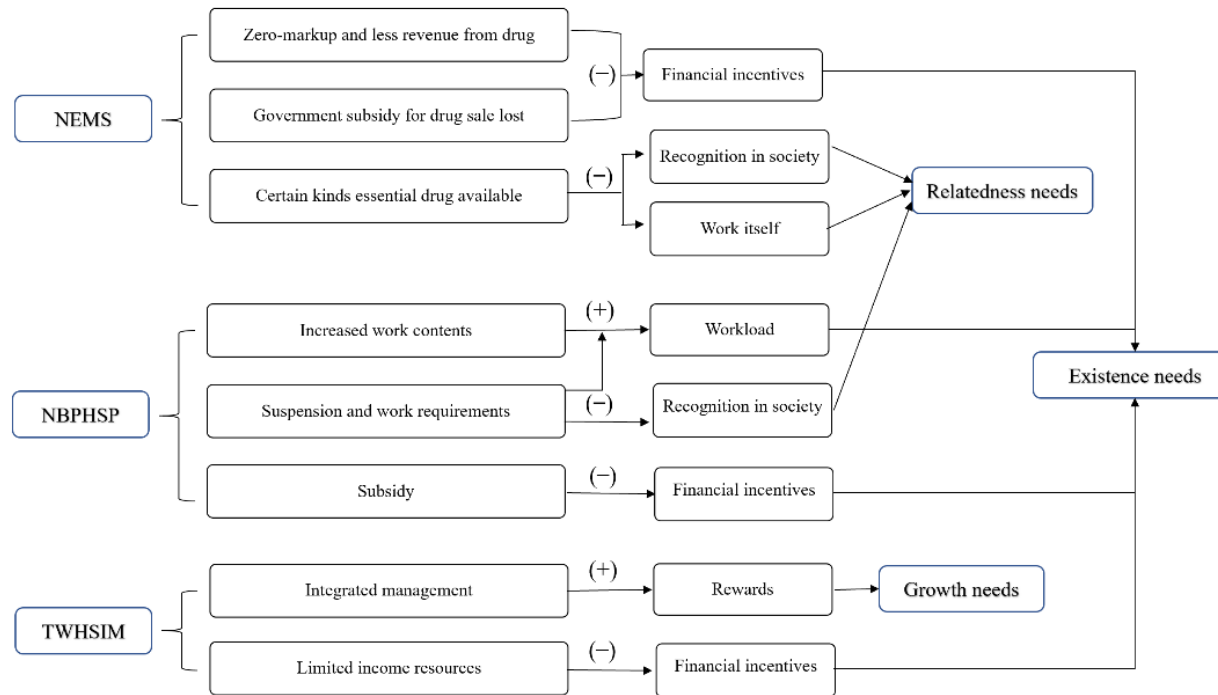

### 5. Overall job satisfaction score among primary care workers

| Study [Citation]          | Study period | Province/city                              | Area  | Sample size | Measurement of scales | Measurement of overall satisfaction | Job satisfaction score | Standard deviation |
|---------------------------|--------------|--------------------------------------------|-------|-------------|-----------------------|-------------------------------------|------------------------|--------------------|
| Liu <i>et al.</i> , 2010  | 2007         | Anhui                                      | rural | 77          | Likert 5 point        | Sum of dimension                    | 3.76*                  | -                  |
| Liu <i>et al.</i> , 2010  | 2007         | Xinjiang                                   | rural | 95          | Likert 5 point        | Sum of dimension                    | 4.49*                  | -                  |
| Ding <i>et al.</i> , 2013 | 2009         | Anhui                                      | urban | 765         | Likert 5 point        | Sum of dimension                    | 3.06                   | 0.497              |
| Ge <i>et al.</i> , 2011   | 2009-2010    | Shenyang City                              | urban | 1010        | Likert 5 point        | Sum of dimension                    | 3.36*                  | -                  |
| Ge <i>et al.</i> , 2011   | 2009-2010    | Benxi City                                 | urban | 684         | Likert 5 point        | Sum of dimension                    | 3.50*                  | -                  |
| Shi <i>et al.</i> , 2014  | 2011         | 5 provinces                                | both  | 863         | Likert 5 point        | Sum of dimension                    | 3.43                   | 0.77               |
| Hung <i>et al.</i> , 2013 | 2011         | Jilin, Anhui, Shandong, Chongqing, Ningxia | both  | 823         | Likert 5 point        | Sum of dimension                    | 3.39                   | -                  |
| Wu <i>et al.</i> , 2014   | 2012         | Zhejiang                                   | both  | 111         | Likert 5 point        | Sum of dimension                    | 3.23                   | 0.06               |
| Li <i>et al.</i> , 2014   | 2012         | Heilongjiang                               | urban | 448         | Likert 5 point        | Sum of dimension                    | 3.69                   | -                  |
| Ding <i>et al.</i> , 2013 | 2012         | Anhui                                      | urban | 495         | Likert 5 point        | Sum of dimension                    | 3.13                   | 0.643              |
| Luo <i>et al.</i> , 2014  | 2012         | Hubei, Hebei, Guizhou, Guangdong, Zhejiang | urban | 3220        | Likert 5 point        | Sum of dimension                    | 3.37                   | -                  |



|                    |      |                                            |       |      |                |                  |       |      |
|--------------------|------|--------------------------------------------|-------|------|----------------|------------------|-------|------|
| Sun et al., 2013   | 2013 | Zhejiang, Guangdong, Guizhou, Hebei, Hubei | urban | 3212 | Likert 5 point | Sum of dimension | 3.44  | -    |
| Fang et al., 2014  | 2012 | Hubei                                      | rural | 1889 | Likert 5 point | Sum of dimension | 2.57  | -    |
| Zhang et al., 2017 | 2013 | Shanghai, Shaanxi, Shandong, Anhui         | urban | 656  | Likert 5 point | Standalone item  | 3.55  | 0.74 |
| Li et al., 2014    | 2013 | Heilongjiang                               | urban | 930  | 4 point        | Sum of dimension | 3.11  | 0.68 |
| Zhang et al., 2016 | 2014 | Jiangxi                                    | rural | 935  | Likert 5 point | Standalone item  | 1.82  | 0.63 |
| Li et al., 2017    | 2014 | Shandong, Guangxi, Shaanxi                 | rural | 1221 | 4 point        | Standalone item  | 2.43* | -    |
| Lu et al., 2016    | 2013 | Guangdong                                  | both  | 5845 | Likert 6 point | Sum of dimension | 3.99  | 0.99 |
| Wang et al., 2017  | 2013 | Shandong, Anhui, Shaanxi                   | rural | 603  | Likert 5 point | Sum of dimension | 3.37  | -    |

---

\* We converted these scores from the sum of percentage scores into 5-grade score: Overall satisfaction = summed score/maximum total score × 5



# PRISMA 2009 Checklist

| Section/topic                      | #  | Checklist item                                                                                                                                                                                                                                                                                              | Reported on page # |
|------------------------------------|----|-------------------------------------------------------------------------------------------------------------------------------------------------------------------------------------------------------------------------------------------------------------------------------------------------------------|--------------------|
| <b>TITLE</b>                       |    |                                                                                                                                                                                                                                                                                                             |                    |
| Title                              | 1  | Identify the report as a systematic review, meta-analysis, or both.                                                                                                                                                                                                                                         | 1                  |
| <b>ABSTRACT</b>                    |    |                                                                                                                                                                                                                                                                                                             |                    |
| Structured summary                 | 2  | Provide a structured summary including, as applicable: background; objectives; data sources; study eligibility criteria, participants, and interventions; study appraisal and synthesis methods; results; limitations; conclusions and implications of key findings; systematic review registration number. | 2-3                |
| <b>INTRODUCTION</b>                |    |                                                                                                                                                                                                                                                                                                             |                    |
| Rationale                          | 3  | Describe the rationale for the review in the context of what is already known.                                                                                                                                                                                                                              | 3-4                |
| Objectives                         | 4  | Provide an explicit statement of questions being addressed with reference to participants, interventions, comparisons, outcomes, and study design (PICOS).                                                                                                                                                  | 5                  |
| <b>METHODS</b>                     |    |                                                                                                                                                                                                                                                                                                             |                    |
| Protocol and registration          | 5  | Indicate if a review protocol exists, if and where it can be accessed (e.g., Web address), and, if available, provide registration information including registration number.                                                                                                                               | 5                  |
| Eligibility criteria               | 6  | Specify study characteristics (e.g., PICOS, length of follow-up) and report characteristics (e.g., years considered, language, publication status) used as criteria for eligibility, giving rationale.                                                                                                      | 5                  |
| Information sources                | 7  | Describe all information sources (e.g., databases with dates of coverage, contact with study authors to identify additional studies) in the search and date last searched.                                                                                                                                  | 5                  |
| Search                             | 8  | Present full electronic search strategy for at least one database, including any limits used, such that it could be repeated.                                                                                                                                                                               | 5                  |
| Study selection                    | 9  | State the process for selecting studies (i.e., screening, eligibility, included in systematic review, and, if applicable, included in the meta-analysis).                                                                                                                                                   | 5                  |
| Data collection process            | 10 | Describe method of data extraction from reports (e.g., piloted forms, independently, in duplicate) and any processes for obtaining and confirming data from investigators.                                                                                                                                  | 6                  |
| Data items                         | 11 | List and define all variables for which data were sought (e.g., PICOS, funding sources) and any assumptions and simplifications made.                                                                                                                                                                       | 7                  |
| Risk of bias in individual studies | 12 | Describe methods used for assessing risk of bias of individual studies (including specification of whether this was done at the study or outcome level), and how this information is to be used in any data synthesis.                                                                                      | N/A                |
| Summary measures                   | 13 | State the principal summary measures (e.g., risk ratio, difference in means).                                                                                                                                                                                                                               | 7                  |
| Synthesis of results               | 14 | Describe the methods of handling data and combining results of studies, if done, including measures of consistency (e.g., $I^2$ ) for each meta-analysis.                                                                                                                                                   | 7                  |

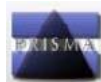

# PRISMA 2009 Checklist

| Section/topic                 | #  | Checklist item                                                                                                                                                                                           | Reported on page #     |
|-------------------------------|----|----------------------------------------------------------------------------------------------------------------------------------------------------------------------------------------------------------|------------------------|
| Risk of bias across studies   | 15 | Specify any assessment of risk of bias that may affect the cumulative evidence (e.g., publication bias, selective reporting within studies).                                                             | N/A                    |
| Additional analyses           | 16 | Describe methods of additional analyses (e.g., sensitivity or subgroup analyses, meta-regression), if done, indicating which were pre-specified.                                                         | N/A                    |
| <b>RESULTS</b>                |    |                                                                                                                                                                                                          |                        |
| Study selection               | 17 | Give numbers of studies screened, assessed for eligibility, and included in the review, with reasons for exclusions at each stage, ideally with a flow diagram.                                          | 7                      |
| Study characteristics         | 18 | For each study, present characteristics for which data were extracted (e.g., study size, PICOS, follow-up period) and provide the citations.                                                             | Supplementary Material |
| Risk of bias within studies   | 19 | Present data on risk of bias of each study and, if available, any outcome level assessment (see item 12).                                                                                                | N/A                    |
| Results of individual studies | 20 | For all outcomes considered (benefits or harms), present, for each study: (a) simple summary data for each intervention group (b) effect estimates and confidence intervals, ideally with a forest plot. | 8-14                   |
| Synthesis of results          | 21 | Present results of each meta-analysis done, including confidence intervals and measures of consistency.                                                                                                  | 14-15                  |
| Risk of bias across studies   | 22 | Present results of any assessment of risk of bias across studies (see Item 15).                                                                                                                          | N/A                    |
| Additional analysis           | 23 | Give results of additional analyses, if done (e.g., sensitivity or subgroup analyses, meta-regression [see Item 16]).                                                                                    | N/A                    |
| <b>DISCUSSION</b>             |    |                                                                                                                                                                                                          |                        |
| Summary of evidence           | 24 | Summarize the main findings including the strength of evidence for each main outcome; consider their relevance to key groups (e.g., healthcare providers, users, and policy makers).                     | 15-19                  |
| Limitations                   | 25 | Discuss limitations at study and outcome level (e.g., risk of bias), and at review-level (e.g., incomplete retrieval of identified research, reporting bias).                                            | 19-20                  |
| Conclusions                   | 26 | Provide a general interpretation of the results in the context of other evidence, and implications for future research.                                                                                  | 20                     |
| <b>FUNDING</b>                |    |                                                                                                                                                                                                          |                        |
| Funding                       | 27 | Describe sources of funding for the systematic review and other support (e.g., supply of data); role of funders for the systematic review.                                                               | 21                     |

From: Moher D, Liberati A, Tetzlaff J, Altman DG, The PRISMA Group (2009). Preferred Reporting Items for Systematic Reviews and Meta-Analyses: The PRISMA Statement. PLoS Med 6(6): e1000097. doi:10.1371/journal.pmed1000097

For more information, visit: [www.prisma-statement.org](http://www.prisma-statement.org).
